# Supplementary material
Source: PubMed Central journal article supplement (PMC6485381)
Supplement: NIHMS77608-supplement-Supplementary_note.pdf [file NIHMS77608-supplement-Supplementary_note.pdf]

# Prediction of AML in healthy individuals

Grace Collord & Moritz Gerstung

Fri Feb 16 16:34:37 2018

- 1 Preliminaries
  - 1.1 Libraries
- 2 AML incidence data
- 3 Discovery cohort
  - 3.1 Data
- 4 Validation cohort
  - 4.1 Data
- 5 Expected AML incidence
  - 5.1 Validation cohort
  - 5.2 Discovery cohort
- 6 Combined data
- 7 Coxph model fits
  - 7.1 Discovery cohort
    - 7.1.1 Non-adjusted
    - 7.1.2 Adjusted
  - 7.2 Validation cohort
    - 7.2.1 Non-adjusted
    - 7.2.2 Adjusted
  - 7.3 Cross-validation
    - 7.3.1 Non-adjusted
    - 7.3.2 Adjusted
  - 7.4 Combined
    - 7.4.1 Non-adjusted
    - 7.4.2 Adjusted
    - 7.4.3 Bootstrap
    - 7.4.4 Forest plot
    - 7.4.5 Dichotomous variables
    - 7.4.6 Bootstrap adjustment
    - 7.4.7 LOOCV
      - 7.4.7.1 Individual Predictions (non-adjusted)
      - 7.4.7.2 Jackknife variance
    - 7.4.8 Multiple bootstraps
    - 7.4.9 Individual Predictions with corrected baseline
    - 7.4.10 Some simulations
    - 7.4.11 Simple models
      - 7.4.11.1 Presence of any mutation
      - 7.4.11.2 Number of mutations + vaf
      - 7.4.11.3 Number of mutations + cumulative vaf
- 8 Logistic regression
  - 8.1 Combined
  - 8.2 Discovery cohort
  - 8.3 Validation cohort
  - 8.4 Bootstrap CIs
  - 8.5 Forest plot
  - 8.6 AUC
- 9 Tabulate results
- 10 Clinical/Demographic model
  - 10.1 Validation cohort
  - 10.2 Expected AML incidence
  - 10.3 Combined data
  - 10.4 Coxph model fits
    - 10.4.1 Discovery cohort
      - 10.4.1.1 Raw
    - 10.4.2 Validation cohort
      - 10.4.2.1 Raw
      - 10.4.2.2 Adjusted
- 11 Model excluding controls without mutations
  - 11.1 Validation cohort
  - 11.2 Expected AML incidence
  - 11.3 Combined data
  - 11.4 Coxph model fits
    - 11.4.1 DC
      - 11.4.1.1 Raw
      - 11.4.1.2 Adjusted
    - 11.4.2 Validation cohort
      - 11.4.2.1 Raw
      - 11.4.2.2 Adjusted
- 12 CoxPH model excluding all samples without ARCH-PD
  - 12.1 Discovery cohort
  - 12.2 Validation cohort
  - 12.3 Expected AML incidence
  - 12.4 Combined data
  - 12.5 Coxph model fits
    - 12.5.1 Toronto
      - 12.5.1.1 Raw
      - 12.5.1.2 Adjusted
    - 12.5.2 Validation cohort
      - 12.5.2.1 Raw
      - 12.5.2.2 Adjusted
- 13 Session

## 1 Preliminaries

### 1.1 Libraries

```
library(CoxHD)
```

```
## Loading required package: survival
```

```
## Loading required package: parallel
```

```
## Loading required package: RColorBrewer
```

```
library(survAUC)  
library(survivalROC)  
library(glmnet)
```

```
## Loading required package: Matrix
```

```
## Loading required package: foreach
```

```
## Loaded glmnet 2.0-13
```

```
library(RColorBrewer)  
  
set1 <- RColorBrewer::brewer.pal(8, "Set1")
```

Helper functions

```
superSet <- function(x, s, fill=NA){  
  i <- intersect(colnames(x), s)  
  n <- setdiff(s, colnames(x))  
  y <- x[,i]  
  if(length(n) > 0)  
    y <- cbind(y, matrix(fill, ncol=length(n), dimnames=list(NULL, n)))[,s]  
  return(y)  
}
```

## 2 AML incidence data

Use known AML incidence to correct bias using weighted controls. The expected incidence of AML was calculated from the UK office of national statistics, available at <http://www.cancerresearchuk.org/health-professional/cancer-statistics/statistics-by-cancer-type/leukaemia-aml/incidence> (<http://www.cancerresearchuk.org/health-professional/cancer-statistics/statistics-by-cancer-type/leukaemia-aml/incidence>). Spline function to interpolate Male denoted by 1 and female by 0

```
age_incidence <- read.table("aml_age_incidence.txt", header=TRUE, sep="\t")  
head(age_incidence)
```

| Age.Range<br><fctr> | Male.Cases<br><int> | Female.Cases<br><int> | Male.Rates<br><dbl> | Female.Rates<br><dbl> |
|---------------------|---------------------|-----------------------|---------------------|-----------------------|
| 1 0 to 04           | 18                  | 12                    | 0.9                 | 0.6                   |
| 2 05 to 09          | 10                  | 10                    | 0.5                 | 0.5                   |
| 3 10 to 14          | 8                   | 10                    | 0.4                 | 0.6                   |
| 4 15 to 19          | 15                  | 14                    | 0.7                 | 0.8                   |
| 5 20 to 24          | 21                  | 18                    | 1.0                 | 0.8                   |
| 6 25 to 29          | 22                  | 20                    | 1.0                 | 0.9                   |

6 rows

```
aml_inc <- function(gender, x){  
  if(gender==1)  
    splinefun(x=c(seq(0,90,5)), y=c(cumsum(age_incidence$Male.Rates/100000)*5)  
  , method="mono")(x)  
  else  
    splinefun(x=c(seq(0,90,5)), y=c(cumsum(age_incidence$Female.Rates/100000)*  
5), method="mono")(x)  
}
```

All cause mortality from the office of national statistics (<https://www.ons.gov.uk/> (<https://www.ons.gov.uk/>)).

```
all_cause_mortality <- read.table("all_cause_mortality.txt", sep="\t", skip=1, header=TRUE)  
head(all_cause_mortality)
```

| x<br><int> | mx<br><dbl> | qx<br><dbl> | lx<br><dbl> | dx<br><dbl> | ex<br><dbl> | X<br><lg> | mx.1<br><dbl> | qx.1<br><dbl> |
|------------|-------------|-------------|-------------|-------------|-------------|-----------|---------------|---------------|
| 1 0        | 0.004234    | 0.004225    | 100000.0    | 422.5       | 79.17       | NA        | 0.003521      | 0.003515      |
| 2 1        | 0.000306    | 0.000306    | 99577.5     | 30.5        | 78.51       | NA        | 0.000246      | 0.000246      |
| 3 2        | 0.000163    | 0.000163    | 99547.1     | 16.2        | 77.53       | NA        | 0.000137      | 0.000137      |
| 4 3        | 0.000127    | 0.000127    | 99530.8     | 12.6        | 76.54       | NA        | 0.000105      | 0.000105      |
| 5 4        | 0.000090    | 0.000090    | 99518.2     | 8.9         | 75.55       | NA        | 0.000081      | 0.000081      |
| 6 5        | 0.000092    | 0.000092    | 99509.3     | 9.2         | 74.56       | NA        | 0.000067      | 0.000067      |

6 rows | 1-10 of 13 columns

```

all_surv <- function(gender, age1, age2){
  if(gender==1)
    s <- all_cause_mortality$lx
  else
    s <- all_cause_mortality$lx.1
  f <- function(x) exp(splinefun(all_cause_mortality$x, log(s), method="mono")(x
))
  f(age2) / f(age1)
}

```

Function combining both

```

aml_inc_or <- Vectorize(function(gender, age1, age2) sum(diff(aml_inc(gender, seq(
age1,age2,1)))*all_surv(gender, age1, seq(age1,age2-1,1)) ), c("gender","age1","a
ge2"))

```

## 3 Discovery cohort

### 3.1 Data

4 (of 95) cases that were sampled within 6 months of AML diagnosis are excluded to avoid skewing model towards significance

```

f = "./arch_data/DC_vaf_matrix_414ctrl_91aml.csv"
torontoData <- read.csv(f)

torontoData$gender <- ifelse(torontoData$Sex == "male", 1,
  ifelse(torontoData$Sex == "female", 0, torontoData$Sex))

torontoData$gender <- as.numeric(torontoData$gender)
colnames(torontoData)

```

```

## [1] "Sample" "ASXL1" "BCOR" "CALR" "CBL" "DNMT3A"
"IDH1" "IDH2"
## [9] "JAK2" "KDM6A" "KIT" "KMT2C" "KRAS" "NF1"
"NRAS" "PHF6"
## [17] "PTPN11" "RUNX1" "SF3B1" "SRSF2" "TET2" "TP53"
"U2AF1" "Diagnosis"
## [25] "fu_years" "age" "Sex" "no_drivers" "gender"

```

Manually standardize

```

torontoData <- torontoData[!duplicated(torontoData),]

gene_vars <- c("CALR", "NRAS", "DNMT3A", "SF3B1", "IDH1", "KIT", "TET2", "RAD21",
"JAK2", "CBL", "KRAS", "PTPN11", "IDH2", "TP53", "NF1", "SRSF2", "CEBPA", "ASXL1",
"RUNX1", "U2AF1", "BCOR", "KDM6A", "PHF6", "KMT2C", "KMT2D")

torontoX <- torontoData[, colnames(torontoData) %in% c(gene_vars, "age", "gender")
]

torontoX <- as.data.frame(torontoX)

```

Only include genes in model if mutated in >2 samples

```

thr <- 2
torontoX <- torontoX[,colSums(torontoX != 0)>=thr]

torontoGroups <- factor(names(torontoX) %in% c("age", "gender")+1, level=1:2, label
s=c("Genes", "Demographics"))

torontoX$age <- torontoX$age/10
names(torontoX)[which(names(torontoX)=="age")] <- "age_10"
g <- torontoGroups == "Genes"
torontoX[,g] <- torontoX[,g]*10
names(torontoX)[g] <- paste(names(torontoX)[g], "0.1", sep="_")

torontoSurv <- Surv(time = torontoData$fu_years, event = torontoData$Diagnosis=="A
ML")
plot(survfit(torontoSurv~ 1))

```

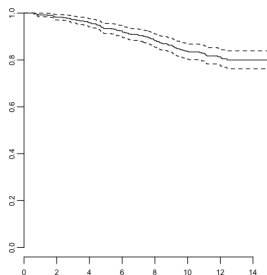

## 4 Validation cohort

### 4.1 Data

```
f = "./arch_data/VC_vaf_matrix_no_duplicates_262ctrl_29aml.csv"
sangerData <- read.csv(f)
colnames(sangerData)
```

```
## [1] "Sample" "ASXL1" "BCOR" "CBL" "CEBPA" "DNM
T3A" "IDH1" "IDH2"
## [9] "JAK2" "KMT2C" "KMT2D" "KRAS" "NF1" "NRA
S" "PTPN11" "RAD21"
## [17] "SF3B1" "SRSF2" "TET2" "TP53" "U2AF1" "Ind
ividual" "DOBFuzz" "hcdat"
## [25] "endpt_age" "Age_at_dx" "Diagnosis" "ever_smoked" "age" "gen
der" "systol" "diastol"
## [33] "bmi" "cholestl" "triglyc" "hdl" "ldl" "lym
" "mcv" "rdw"
## [41] "wbc" "rbc" "hct" "plt" "hgb" "dod
" "dead" "dodx"
## [49] "prev_dm" "prev_mi" "prev_cva" "no_drivers"
```

```
head(sangerData[, c("Sample", "gender")]) #male=1, female=0
```

| Sample<br><fctr> | gender<br><int> |
|------------------|-----------------|
| 1 PD29762b       | 0               |
| 2 PD29764b       | 0               |
| 3 PD29792b       | 0               |
| 4 PD29804c       | 0               |
| 5 PD29810c       | 1               |
| 6 PD29836b       | 0               |

6 rows

NB all dates are jittered

```
sangerData$hcdat <- as.Date(sangerData$hcdat)
sangerData$dodx <- as.Date(sangerData$dodx)

sangerPatients <- sub("[a-z]+$", "", sangerData$Sample)
o <- order(sangerPatients, as.numeric(sangerData$hcdat))

sangerData <- sangerData[o,]
sangerPatients <- sangerPatients[o]

clinical_vars <- c("systol", "diastol", "bmi", "cholestl", "triglyc", "hdl", "ldl",
"lym", "mcv", "rdw", "wbc", "plt", "hgb")
sangerX <- sangerData[, colnames(sangerData) %in% c(gene_vars, "age", "gender", clin
ical_vars)]
sangerX <- as.data.frame(sangerX)

sangerX <- sangerX[, colSums(sangerX != 0, na.rm=TRUE) >= thr]
sangerGroups <- factor(grepl("[a-z]", colnames(sangerX))*2, levels=0:2, labels=c(
"Genes", "Demographics", "Blood"))
sangerGroups[names(sangerX) %in% c("age", "gender")] <- "Demographics"
table(sangerGroups)
```

```
## sangerGroups
## Genes Demographics Blood
## 15 2 13
```

```
g <- sangerGroups=="Genes"
sangerX[g] <- sangerX[g] * 10
names(sangerX)[g] <- paste(names(sangerX[g]), "0.1", sep="_")
y <- StandardizeMagnitude(sangerX[!g])
sangerX <- cbind(sangerX[g], y)

poorMansImpute <- function(x) {x[is.na(x)] <- mean(x, na.rm=TRUE); return(x)}
sangerX <- as.data.frame(sapply(sangerX, poorMansImpute))

foo <- split(sangerData[, c("Diagnosis", "hcdat", "dodx")], sangerPatients)

bar <- do.call("rbind", lapply(foo, function(x){
y <- x
n <- nrow(y)
y[-n, "Diagnosis"] <- "Control"
start <- as.numeric(y$hcdat - y$hcdat[1])/365.25
end <- c(as.numeric(y$hcdat - y$hcdat[1])[-1])/365.25, as.nu
meric(y$dodx[n] - y$hcdat[1])/365.25)
return(data.frame(Diagnosis=y[, "Diagnosis"], start=start, end=
end))
}))

bar[1:6, ]
```

| Diagnosis<br><fctr> | start<br><dbl> | end<br><dbl> |
|---------------------|----------------|--------------|
|---------------------|----------------|--------------|

|           |         |   |           |
|-----------|---------|---|-----------|
| PD29762   | AML     | 0 | 9.754962  |
| PD29764   | AML     | 0 | 10.360027 |
| PD29792   | AML     | 0 | 14.108145 |
| PD29804   | Control | 0 | 5.138946  |
| PD29810   | Control | 0 | 18.573580 |
| PD29836.1 | Control | 0 | 2.414784  |

6 rows

```
sangerPatientsSplit <- unlist(sapply(names(foo), function(n) rep(n, nrow(foo[[n]]))
))

sangerSurv <- Surv(time = bar$start, time2 = bar$end, event = bar$Diagnosis!="Control",
origin = 0)
plot(survfit(sangerSurv ~ 1), ylab="AML-free fraction", xlab="Time [yr]")
```

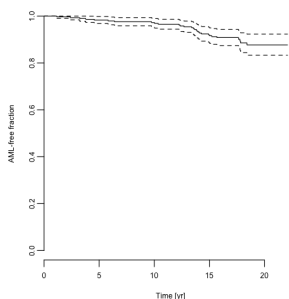

## 5 Expected AML incidence

### 5.1 Validation cohort

```
head(sangerSurv)
```

```
## [1] (0, 9.754962] (0,10.360027] (0,14.108145] (0, 5.138946+] (0,18.573580+]
(0, 2.414784+]
```

```
w <- c(which(sangerSurv[,1]==0)[-1]-1, nrow(sangerSurv))
head(sangerSurv[w,])
```

```
## [1] (0.000000, 9.754962] (0.000000,10.360027] (0.000000,14.108145] (0.000000
, 5.138946+] (0.000000,18.573580+]
## [6] (2.414784,10.023272]
```

```
sangerSurv2 <- Surv(sangerSurv[w,2], sangerSurv[w,3])
```

```
expected_rate_sanger_cr <- mean(aml_inc_cr(sangerX[w,"gender"],sangerX[w,"age_10"]
*10, sangerX[w,"age_10"]*10+ pmax(1,sangerSurv2[,1]))[!sangerSurv2[,2]])
```

```
n_total_sanger <- sum(sangerSurv2[,2])/expected_rate_sanger_cr
n_total_sanger
```

```
## [1] 10406.64
```

### 5.2 Discovery cohort

```
expected_rate_toronto_cr <- mean(aml_inc_cr(torontoX[, "gender"],torontoX[, "age_10"]
]*10, torontoX[, "age_10"]*10+ pmax(1,torontoSurv[,1]))[!torontoSurv[,2]])
```

```
n_total_toronto <- sum(torontoSurv[,2])/expected_rate_toronto_cr
n_total_toronto
```

```
## [1] 72377.73
```

## 6 Combined data

Survival

```
allSurv <- rbind(sangerSurv, Surv(rep(0, nrow(torontoSurv)), torontoSurv[,1], toro
ntoSurv[,2]))
allSurv <- Surv(allSurv[,1], allSurv[,2], allSurv[,3])
```

Data matrix

```
cohort <- c(rep("Sanger", nrow(sangerX)), rep("Toronto", nrow(torontoX)))
i <- c(sort(setdiff(gene_vars, "CALR")), "age", "gender")
allX <- rbind(superSet(sangerData, i, fill=0), superSet(torontoData, i, fill=0))
allX <- allX[,colSums(allX>0)>=thr]
allX <- cbind(allX, cohort=cohort=="Sanger") + 0
allGroups <- factor(grepl("[A-Z]",colnames(allX))+0, levels=1:0, labels=c("Genes",
"Demographics"))
```

```
g <- allGroups=="Genes"
allX <- cbind(10*allX[,g], StandardizeMagnitude(allX[,!g]))
colnames(allX)[g] <- paste(colnames(allX)[g], "0.1", sep="_")
control <- c(sangerData$Diagnosis=="Control", torontoData$Diagnosis=="Control")
```

## Weights

```
weights <- rep(1, nrow(allX))
weights[cohort=="Sanger" & control] <- n_total_sanger/sum(cohort=="Sanger" & control & allSurv[,1]==0)
weights[cohort=="Toronto" & control] <- n_total_toronto/sum(cohort=="Toronto" & control)

n_total <- n_total_sanger + n_total_toronto
n_total
```

```
## [1] 82784.38
```

## 7 Coxph model fits

```
sigma0 <- 0.1
nu <- 1
which.mu <- "Genes"
```

### 7.1 Discovery cohort

#### 7.1.1 Non-adjusted

```
fitToronto <- CoxRFX(torontoX, torontoSurv, groups=torontoGroups, which.mu=which.mu, nu=nu, sigma0=sigma0)
waldToronto <- WaldTest(fitToronto)
```

```
##          group   coef  coef-mu   sd     z  df  p.value sig
## ASXL1_0.1  Genes  0.6715  3.40e-02 0.1169  5.745  1 9.19e-09 ***
## CALR_0.1   Genes  0.6168 -2.07e-02 0.0717  8.603  1 7.76e-18 ***
## CBL_0.1    Genes  0.5158 -1.22e-01 0.1311  3.935  1 8.30e-05 ***
## DNMT3A_0.1 Genes  0.5860 -5.15e-02 0.1017  5.761  1 8.36e-09 ***
## IDH1_0.1   Genes  0.6818  4.43e-02 0.1269  5.373  1 7.74e-08 ***
## IDH2_0.1   Genes  0.5153 -1.22e-01 0.1159  4.446  1 8.74e-06 ***
## JAK2_0.1   Genes  0.6967  5.92e-02 0.1249  5.580  1 2.40e-08 ***
## KDM6A_0.1  Genes  0.6375  2.36e-05 0.0581  10.982  1 4.67e-28 ***
## KMT2C_0.1  Genes  0.6602  2.27e-02 0.0618  10.689  1 1.14e-26 ***
## KRAS_0.1   Genes  0.6350 -2.46e-03 0.0581  10.932  1 8.12e-28 ***
## NF1_0.1    Genes  0.6359 -1.61e-03 0.0581  10.947  1 6.86e-28 ***
## PHF6_0.1   Genes  0.6429  5.40e-03 0.0586  10.978  1 4.87e-28 ***
## PTPN11_0.1 Genes  0.6546  1.71e-02 0.0583  11.224  1 3.11e-29 ***
## RUNX1_0.1  Genes  0.3926 -2.45e-01 0.0927  4.236  1 2.27e-05 ***
## SF3B1_0.1  Genes  0.7605  1.23e-01 0.1045  7.274  1 3.49e-13 ***
## SRSF2_0.1  Genes  0.4847 -1.53e-01 0.0944  5.134  1 2.83e-07 ***
## TET2_0.1   Genes  0.6127 -2.48e-02 0.1300  4.712  1 2.46e-06 ***
## TP53_0.1   Genes  0.8595  2.22e-01 0.0875  9.823  1 8.99e-23 ***
## U2AF1_0.1  Genes  0.8524  2.15e-01 0.0785  10.860  1 1.79e-27 ***
## age_10    Demographics -0.0387 -3.87e-02 0.0943 -0.410  1 6.82e-01
## gender    Demographics -0.0434 -4.34e-02 0.1069 -0.406  1 6.85e-01
```

```
survConcordance(fitToronto$surv ~ fitToronto$linear.predictors)
```

```
## Call:
## survConcordance(formula = fitToronto$surv ~ fitToronto$linear.predictors)
##
## n = 505
## Concordance = 0.7426378 se = 0.03079247
## concordant discordant tied.risk tied.time std(c-d)
## 28925.000 10024.000 0.000 1.000 2398.672
```

#### 7.1.2 Adjusted

```
fitWeightedToronto <- CoxRFX(torontoX, torontoSurv, torontoGroups, which.mu=which.mu, sigma0=sigma0, nu=nu, weights=weights[cohort=="Toronto"])
waldWeightedToronto <- WaldTest(fitWeightedToronto)
```

```
##
## ASXL1_0.1      Genes  1.9481  0.0184  0.1452  13.415  1 4.92e-41 ***
## CALR_0.1      Genes  0.8664 -1.0633  0.7205  1.202  1 2.29e-01
## CBL_0.1       Genes  0.3846 -1.5451  0.3618  1.063  1 2.88e-01
## DNMT3A_0.1    Genes  0.7091 -1.2206  0.1236  5.736  1 9.70e-09 ***
## IDH1_0.1     Genes  2.3976  0.4679  0.3353  7.151  1 8.63e-13 ***
## IDH2_0.1     Genes  0.8112 -1.1185  0.2286  3.548  1 3.88e-04 ***
## JAK2_0.1     Genes  1.9253 -0.0044  0.1819  10.586  1 3.45e-26 ***
## KDM6A_0.1    Genes  1.9404  0.0107  0.1355  14.323  1 1.56e-46 ***
## KMT2C_0.1    Genes  2.4139  0.4841  0.6457  3.739  1 1.85e-04 ***
## KRAS_0.1     Genes  1.8253 -0.1044  0.1565  11.665  1 1.93e-31 ***
## NF1_0.1     Genes  1.8627 -0.0670  0.1522  12.238  1 1.94e-34 ***
## PHF6_0.1     Genes  2.1738  0.2441  0.1301  16.706  1 1.19e-62 ***
## PTPN11_0.1   Genes  2.5509  0.6212  0.2150  11.867  1 1.76e-32 ***
## RUNX1_0.1    Genes  0.7839 -1.1458  0.1361  5.761  1 8.38e-09 ***
## SF3B1_0.1    Genes  3.1354  1.2057  0.3087  10.156  1 3.11e-24 ***
## SRSF2_0.1    Genes  1.3985 -0.5312  0.1706  8.196  1 2.49e-16 ***
## TET2_0.1     Genes  0.6793 -1.2504  0.2014  3.373  1 7.43e-04 ***
## TP53_0.1     Genes  4.8882  2.9585  0.4224  11.572  1 5.69e-31 ***
## U2AF1_0.1    Genes  3.9699  2.0402  0.3601  11.024  1 2.94e-28 ***
## age_10       Demographics -0.0869 -0.0869  0.0996  -0.872  1 3.83e-01
## gender       Demographics -0.0443 -0.0443  0.1112  -0.399  1 6.90e-01
```

```
survConcordance(fitWeightedToronto$urv ~ fitWeightedToronto$linear.predictors, weights=weights[cohort=="Toronto"])
```

```
## Call:
## survConcordance(formula = fitWeightedToronto$urv ~ fitWeightedToronto$linear.predictors,
## weights = weights[cohort == "Toronto"])
##
## n = 505
## Concordance = 0.7739557 se = 0.03055735
## concordant discordant tied.risk tied.time std(c-d)
## 4719299.0 1378335.7 0.0 1.0 372655.1
```

Uno's estimator of cumulative/dynamic AUC

```
a <- AUC.uno(torontoSurv, torontoSurv, fitWeightedToronto$linear.predictors, times = seq(0,12, 0.1))
round(a$aiauc, digits = 3)
```

```
## [1] 0.761
```

```
png("./figures/DC.adj.coxph.auc.uno.png", width = 14, height = 14, units = "cm", res = 800)
par(mar = c(4, 4, 4, 2) + 0.1, mgp=c(2.7,0.7,0), bty="L", tcl = -0.2, las = 1, cex .lab = 1.1)
plot(a$times, a$auc, xlab="Time (years)", ylab="AUC", pch=16, col="grey80", ylim = c(0,1.0))
lines(a$times, predict(loess(a$auc ~ a$times, span=0.25)))
abline(h=a$aiauc, lty = 3, lwd = 1)
mtext("Adjusted Cox PH model DC", font= 2, side = 3, cex = 1, line = 0.5)
legend("bottomright", bty = "n", cex = 1.2, legend = paste("AUC = ",round(a$aiauc,2)))
dev.off()
```

```
## pdf
## 2
```

Time-dependent ROC AUC

```
r <- survivalROC(Stime = torontoSurv[,1], status=torontoSurv[,2], marker=fitWeightedToronto$linear.predictors-colMeans(fitWeightedToronto$Z) %>% fitWeightedToronto$coefficients, predict.time = 10, method="NNE", span=0.001)
round(r$aAUC, digits = 3)
```

```
## [1] 0.783
```

```
png("./figures/DC.adj.coxph.roct.png", width = 14, height = 14, units = "cm", res = 800)
par(mar = c(4, 4, 4, 2) + 0.1, mgp=c(2.7,0.7,0), bty="L", tcl = -0.2, las = 1, cex .lab = 1.1)
plot(r$FP, r$TP, type='s',
xlab="False Positive Rate", ylab="True Positive Rate",
col = "black")
mtext("Adjusted Cox PH model DC", font= 2, side = 3, cex = 1, line = 0.5)
abline(a = 0, b = 1, col = "grey70", lty = 1, lwd = 1)
legend("bottomright", bty = "n", cex = 1.2, legend = paste("AUC = ",round(r$aAUC,2)))
dev.off()
```

```
## pdf
## 2
```

## 7.2 Validation cohort

### 7.2.1 Non-adjusted

```
fitSanger <- CoxRFX(sangerX, sangerSurv, groups=sangerGroups, which.mu=which.mu, n
u=nu, sigma0=sigma0)
waldSanger <- WaldTest(fitSanger)
```

```
##           group      coef  coef-mu      sd      z df  p.value sig
## ASXL1_0.1    Genes  0.76929  0.138331  0.11468  6.7084  1 1.97e-11 ***
## CBL_0.1      Genes  0.62044 -0.010519  0.09149  6.7814  1 1.19e-11 ***
## DNMT3A_0.1   Genes  0.51590 -0.115058  0.11678  4.4176  1 9.98e-06 ***
## JAK2_0.1     Genes  0.58502 -0.045941  0.10315  5.6716  1 1.42e-08 ***
## KMT2C_0.1    Genes  0.64589  0.014930  0.08616  7.4961  1 6.57e-14 ***
## KMT2D_0.1    Genes  0.50507 -0.125896  0.15209  3.3209  1 8.97e-04 ***
## KRAS_0.1     Genes  0.63604  0.005083  0.08495  7.4876  1 7.02e-14 ***
## NF1_0.1      Genes  0.62556 -0.005397  0.08610  7.2657  1 3.71e-13 ***
## NRAS_0.1     Genes  0.63025 -0.000712  0.08492  7.4214  1 1.16e-13 ***
## RAD21_0.1    Genes  0.62875 -0.002212  0.08524  7.3763  1 1.63e-13 ***
## SF3B1_0.1    Genes  0.62728 -0.003678  0.08572  7.3181  1 2.52e-13 ***
## SRSF2_0.1    Genes  0.58180 -0.049163  0.12680  4.5883  1 4.47e-06 ***
## TET2_0.1     Genes  0.69969  0.068723  0.11185  6.2555  1 3.96e-10 ***
## TP53_0.1     Genes  0.69326  0.062294  0.08559  8.0998  1 5.51e-16 ***
## U2AF1_0.1    Genes  0.70018  0.069214  0.08556  8.1832  1 2.76e-16 ***
## age_10       Demographics 0.10777  0.107774  0.12063  0.8934  1 3.72e-01
## gender       Demographics 0.00589  0.005894  0.10667  0.0553  1 9.56e-01
## systol_100   Blood  0.03002  0.030016  0.04429  0.6777  1 4.98e-01
## diastol_100  Blood  0.04718  0.047181  0.02863  1.6478  1 9.94e-02 .
## bmi_10       Blood  0.14183  0.141832  0.07973  1.7790  1 7.52e-02 .
## cholestl_10  Blood  0.00525  0.005246  0.01501  0.3496  1 7.27e-01
## triglyc      Blood  0.00450  0.004496  0.10599  0.0424  1 9.66e-01
## hdl          Blood -0.09452 -0.094522  0.08059 -1.1729  1 2.41e-01
## ldl          Blood  0.11424  0.114236  0.11019  1.0367  1 3.00e-01
## lym          Blood  0.10961  0.109610  0.10081  1.0872  1 2.77e-01
## mcv_100      Blood -0.01645 -0.016447  0.00817 -2.0136  1 4.41e-02 *
## rdw_10       Blood  0.06116  0.061157  0.01972  3.1015  1 1.93e-03 **
## wbc_10       Blood  0.01499  0.014994  0.04138  0.3623  1 7.17e-01
## plt_100      Blood  0.06837  0.068369  0.09739  0.7020  1 4.83e-01
## hgb_10       Blood  0.04890  0.048900  0.02466  1.9826  1 4.74e-02 *
```

```
survConcordance(sangerSurv ~ fitSanger$linear.predictors)
```

```
## Call:
## survConcordance(formula = sangerSurv ~ fitSanger$linear.predictors)
##
## n = 445
## Concordance = 0.793915 se = 0.05514512
## concordant discordant tied.risk tied.time std(c-d)
## 5532.0000 1436.0000 0.0000 0.0000 768.5024
```

## 7.2.2 Adjusted

```
fitWeightedSanger <- CoxRFX(sangerX, sangerSurv, sangerGroups, which.mu=which.mu,
sigma0=sigma0, nu=nu, weights=weights[cohort=="Sanger"])
waldWeightedSanger <- WaldTest(fitWeightedSanger)
```

```
##           group      coef  coef-mu      sd      z df  p.value sig
## ASXL1_0.1    Genes  2.93589  0.95179  0.45155  6.5018  1 7.93e-11 ***
## CBL_0.1      Genes  0.89451 -1.08959  1.25454  0.7130  1 4.76e-01
## DNMT3A_0.1   Genes  0.80635 -1.17775  0.22686  3.5544  1 3.79e-04 ***
## JAK2_0.1     Genes -0.33650 -2.32060  0.95076 -0.3539  1 7.23e-01
## KMT2C_0.1    Genes  2.07422  0.09012  1.10633  1.8749  1 6.08e-02 .
## KMT2D_0.1    Genes  0.05067 -1.93343  0.81191  0.0624  1 9.50e-01
## KRAS_0.1     Genes  2.45194  0.46784  0.41069  5.9702  1 2.37e-09 ***
## NF1_0.1      Genes  1.54402 -0.44008  0.90581  1.7046  1 8.83e-02 .
## NRAS_0.1     Genes  1.92976 -0.05434  0.37569  5.1366  1 2.80e-07 ***
## RAD21_0.1    Genes  1.75445 -0.22966  0.66215  2.6496  1 8.06e-03 **
## SF3B1_0.1    Genes  1.56640 -0.41770  0.99531  1.5738  1 1.16e-01
## SRSF2_0.1    Genes  1.51230 -0.47181  0.27893  5.4217  1 5.90e-08 ***
## TET2_0.1     Genes  1.31638 -0.66772  0.13659  9.6374  1 5.56e-22 ***
## TP53_0.1     Genes  4.92658  2.94248  0.92037  5.3528  1 8.66e-08 ***
## U2AF1_0.1    Genes  6.33456  4.35046  0.76145  8.3191  1 8.86e-17 ***
## age_10       Demographics 0.03788  0.03788  0.11866  0.3193  1 7.50e-01
## gender       Demographics -0.01411 -0.01411  0.10079 -0.1400  1 8.89e-01
## systol_100   Blood  0.01712  0.01712  0.04486  0.3816  1 7.03e-01
## diastol_100  Blood  0.03900  0.03900  0.02964  1.3156  1 1.88e-01
## bmi_10       Blood  0.15297  0.15297  0.08406  1.8198  1 6.88e-02 .
## cholestl_10  Blood  0.00238  0.00238  0.01544  0.1542  1 8.77e-01
## triglyc      Blood -0.03451 -0.03451  0.11758 -0.2935  1 7.69e-01
## hdl          Blood -0.12128 -0.12128  0.08447 -1.4357  1 1.51e-01
## ldl          Blood  0.13215  0.13215  0.11436  1.1555  1 2.48e-01
## lym          Blood  0.07976  0.07976  0.10326  0.7724  1 4.40e-01
## mcv_100      Blood -0.02401 -0.02401  0.00786 -3.0529  1 2.27e-03 **
## rdw_10       Blood  0.06721  0.06721  0.01666  4.0355  1 5.45e-05 ***
## wbc_10       Blood  0.00757  0.00757  0.04834  0.1567  1 8.76e-01
## plt_100      Blood  0.08415  0.08415  0.09986  0.8427  1 3.99e-01
## hgb_10       Blood  0.03718  0.03718  0.02437  1.5255  1 1.27e-01
```

```
survConcordance(sangerSurv ~ fitWeightedSanger$linear.predictors, weights=weights[
cohort=="Sanger"])
```

```
## Call:
## survConcordance(formula = sangerSurv ~ fitWeightedSanger$linear.predictors,
## weights = weights[cohort == "Sanger"])
##
## n = 445
## Concordance = 0.8351691 se = 0.05475847
## concordant discordant tied.risk tied.time std(c-d)
## 218019.86 43028.90 0.00 0.00 28589.26
```



```
w <- c(which(sangerSurv[,1]==0)[-1]-1, nrow(sangerSurv)) #get right censored survival data for each individual
s <- Surv(sangerSurv[w,2], sangerSurv[w,3]) ##adjust according to dimensions of survival object
a <- AUC.uno(s, s, fitWeightedSanger$linear.predictors[w], times = c(0, 22, 0.1))
round(a$iauc, digits = 3)
```

```
## [1] 0.811
```

Time-dependent ROC AUC

```
r <- survivalROC(Stime = s[,1], status=s[,2], marker=fitWeightedSanger$linear.predictors[w]-colMeans(fitWeightedSanger$Z[w,]) %*% fitWeightedSanger$coefficients, predict.time = 10, method="NNE", span=0.001)
round(r$AUC, digits = 3)
```

```
## [1] 0.737
```

```
png("./figures/VC.ajd.coxph.roct.png", width = 14, height = 14, units = "cm", res = 500)
par(mar = c(4, 4, 4, 2) + 0.1, mgp=c(2.7,0.7,0), bty="L", tcl=-0.2, las = 1, cex .lab = 1.1)
plot(r$FP, r$TP, type='s',
     xlab="False Positive Rate", ylab="True Positive Rate",
     col = "black")
mtext("Adjusted Cox PH VC", font= 2, side = 3, cex = 1, line = 0.5)
abline(a = 0, b = 1, col = "grey70", lty = 1, lwd = 1)
legend("bottomright", bty = "n", cex = 1.2, legend = paste("AUC = ",round(r$AUC,2)
))
dev.off()
```

```
## pdf
## 2
```

```
i <- intersect(rownames(waldWeightedSanger), rownames(waldWeightedToronto))
plot( waldWeightedToronto[i,"coef"], waldWeightedSanger[i, "coef"], xlab="Coef Discovery (adjusted)", ylab="Coef Validation (adjusted)", pch=19, cex=1)
segments(waldWeightedToronto[i,"coef"] - 2*waldWeightedToronto[i,"sd"], waldWeightedSanger[i, "coef"],
         waldWeightedSanger[i, "coef"], waldWeightedToronto[i,"coef"] + 2*waldWeightedToronto[i,"sd"],
         waldWeightedSanger[i, "coef"], col="grey" )
segments(waldWeightedToronto[i,"coef"], waldWeightedSanger[i, "coef"]- 2*waldWeightedSanger[i,"sd"],
         waldWeightedSanger[i,"sd"], waldWeightedToronto[i,"coef"],
         waldWeightedSanger[i, "coef"] + 2*waldWeightedSanger[i,"sd"], col="grey")
text(labels=sub("_."+",", i), waldWeightedToronto[i,"coef"], waldWeightedSanger[i, "coef"],
     pos=2, adj=c(0,1))
abline(0,1)
```

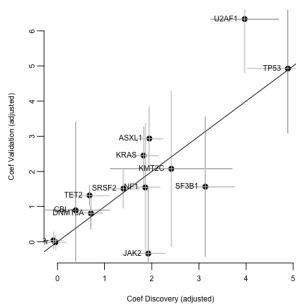

```
plot( waldToronto[i,"coef"], waldSanger[i, "coef"], xlab="Coef Discovery (raw)", ylab="Coef Validation (raw)", pch=19, cex=1, ylim=c(0,5),xlim=c(0,5))
segments(waldToronto[i,"coef"] - 2*waldToronto[i,"sd"], waldSanger[i, "coef"],
         waldSanger[i, "coef"], waldToronto[i,"coef"] + 2*waldToronto[i,"sd"],
         waldSanger[i, "coef"], col="grey" )
segments(waldToronto[i,"coef"], waldSanger[i, "coef"]- 2*waldSanger[i,"sd"],
         waldSanger[i,"sd"], waldToronto[i,"coef"],
         waldSanger[i, "coef"] + 2*waldSanger[i,"sd"], col="grey")
text(labels=sub("_."+",", i), waldToronto[i,"coef"], waldSanger[i, "coef"],
     pos=2, adj=c(0,1))
abline(0,1)
```

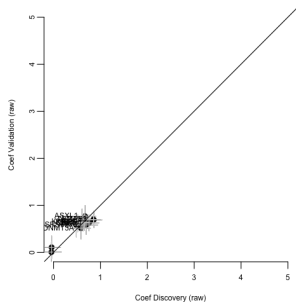

## 7.3 Cross-validation

### 7.3.1 Non-adjusted

```
sangerImp <- torontoX[1:nrow(sangerX),]
sangerImp[,] <- NA
i <- intersect(names(sangerX),colnames(torontoX))
sangerImp[,i] <- sangerX[,i]
j <- setdiff(names(torontoX)[torontoGroups=="Genes"], names(sangerX))
sangerImp[,j] <- 0
```

DC fit, VC data

```
pS <- PredictRiskMissing(fitToronto, sangerImp)
survConcordance(sangerSurv ~ pS[,1])
```

```
## Call:
## survConcordance(formula = sangerSurv ~ pS[, 1])
##
## n= 445
## Concordance= 0.7963548 se= 0.05514445
## concordant discordant tied.risk tied.time std(c-d)
## 5545.000 1415.000 8.000 0.000 768.493
```

```
w <- c(which(sangerSurv[,1]==0)[-1]-1, nrow(sangerSurv))
s <- Surv(sangerSurv[w,2], sangerSurv[w,3])
t <- seq(0,10,0.1)
a <- AUC.uno(torontoSurv, s, pS[w,1], times=t)
plot(a$times, a$auc, xlab="Time [yr]", ylab="AUC", pch=16, col='grey')
lines(a$times, predict(loess(a$auc ~ a$times, span=0.25)))
abline(h=a$iauc)
```

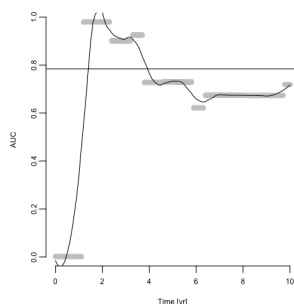

```
torontoImp <- sangerX[1:nrow(torontoX),]
torontoImp[,] <- NA
i <- intersect(names(sangerX),colnames(torontoX))
torontoImp[,i] <- torontoX[,i]
j <- setdiff(names(sangerX)[sangerGroups=="Genes"], names(torontoX))
torontoImp[,j] <- 0
```

VC fit, DC data

```
pT <- PredictRiskMissing(fitSanger, torontoImp)
survConcordance(torontoSurv ~ pT[,1])
```

```
## Call:
## survConcordance(formula = torontoSurv ~ pT[, 1])
##
## n= 505
## Concordance= 0.6992477 se= 0.03079247
## concordant discordant tied.risk tied.time std(c-d)
## 27235.000 11714.000 0.000 1.000 2398.672
```

```
t <- seq(0,22,0.1)
a <- AUC.uno(s, torontoSurv, pT[,1], times=t)
plot(a$times, a$auc, xlab="Time [yr]", ylab="AUC", pch=16, col='grey')
lines(a$times, predict(loess(a$auc ~ a$times, span=0.25)))
abline(h=a$iauc)
```

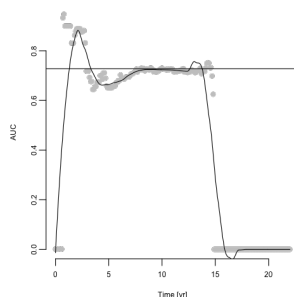

```
sangerM <- sangerX
sangerM[,sangerGroups=="Blood"] <- NA
p <- PredictRiskMissing(fitSanger, sangerM)
survConcordance(sangerSurv ~ p[,1])
```

```
## Call:
## survConcordance(formula = sangerSurv ~ p[, 1])
##
## n= 445
## Concordance= 0.8069747 se= 0.05514449
## concordant discordant tied.risk tied.time std(c-d)
## 5619.0000 1341.0000 8.0000 0.0000 768.4936
```

```

plot(waldToronto[i,"coef"], waldSanger[i,"coef"], xlab="Coef Toronto", ylab="Coef Sanger", xlim=c(-0.5,2), ylim=c(-0.5,2))
text(labels=i,waldToronto[i,"coef"], waldSanger[i,"coef"], pos=3)
segments(x0=waldToronto[i,"coef"], x1=waldToronto[i,"coef"], y0= waldSanger[i,"coef"]-1.96*waldSanger[i,"sd"], y1=waldSanger[i,"coef"]+1.96*waldSanger[i,"sd"])
segments(x0=waldToronto[i,"coef"]-1.96*waldToronto[i,"sd"], x1=waldToronto[i,"coef"]+1.96*waldToronto[i,"sd"], y0= waldSanger[i,"coef"], y1=waldSanger[i,"coef"])
abline(0,1)
abline(h=0, lty=3)
abline(v=0, lty=3)

```

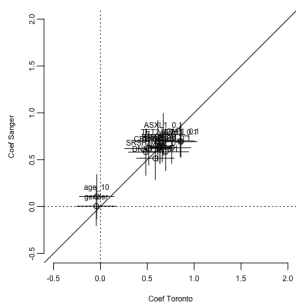

## 7.3.2 Adjusted

DC fit, VC data

```

pS <- PredictRiskMissing(fitWeightedToronto, sangerImp)
survConcordance(sangerSurv ~ pS[,1], weights=weights[cohort=="Sanger"])

```

```

## Call:
## survConcordance(formula = sangerSurv ~ pS[, 1], weights = weights[cohort ==
## "Sanger"])
##
## n= 445
## Concordance= 0.821456 se= 0.05475772
## concordant discordant tied.risk tied.time std(c-d)
## 214281.1753 46449.8206 317.7601 0.0000 28588.8682

```

```

m <- as.numeric(colSums(fitWeightedToronto$Z * weights[cohort=="Toronto"])/sum(weights[cohort=="Toronto"])) %*% coef(fitWeightedToronto)
plot(survfit(sangerSurv ~ exp(pS[,1]-as.numeric(m))>50, weights=weights[cohort=="Sanger"]), col=set1[2:1], ylab="AML-free survival", xlab='Years after 1st sample')
legend("bottomleft", c("HR < 50", "HR > 50"), lty=1, col=set1[2:1])

```

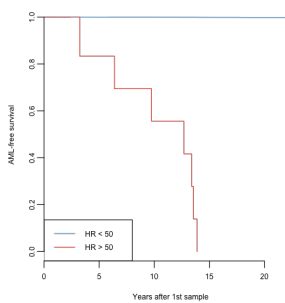

```

w <- c(which(sangerSurv[,1]==0)[-1]-1, nrow(sangerSurv))
s <- Surv(sangerSurv[w,2], sangerSurv[w,3])
t <- seq(0,10,0.1)
a <- AUC.uno(torontoSurv, s, pS[w,1], times=t)
plot(a$times, a$auc, xlab="Time [yr]", ylab="AUC", pch=16, col='grey')
lines(a$times, predict(loess(a$auc ~ a$times, span=0.25)))
abline(h=a$iauc)

```

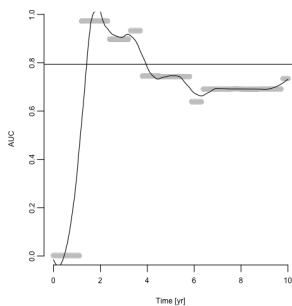

```
png("./figures/DCfit.VCdata.adj.coxph.auc.uno.png", width = 14, height = 14, units
= "cm", res = 500)
par(mar = c(4, 4, 4, 2) + 0.1, mgp=c(2.7,0.7,0), bty="L", tcl =-0.2, las = 1, cex
.lab = 1.1)
plot(a$times, a$auc, xlab="Time (years)", ylab="AUC", pch=16, col="grey80", ylim =
c(0,1.0))
lines(a$times, predict(loess(a$auc ~ a$times, span=0.25)))
abline(h=a$aiauc, lty = 3, lwd = 1)
mtext("DC fit, VC data", font = 2, side = 3, cex = 1, line = 0.5)
legend("bottomright", bty = "n", cex = 1.2, legend = paste("AUC = ",round(a$aiauc,2
)))
dev.off()
```

```
## pdf
## 2
```

VC fit, DC data

```
pT <- PredictRiskMissing(fitWeightedSanger, torontoImp)
survConcordance(torontoSurv ~ pT[,1], weights=weights[cohort=="Toronto"])
```

```
## Call:
## survConcordance(formula = torontoSurv ~ pT[, 1], weights = weights[cohort ==
## "Toronto"])
##
## n = 505
## Concordance= 0.7202544 se= 0.03055735
## concordant discordant tied.risk tied.time std(c-d)
## 4391848.0 1705786.7 0.0 1.0 372655.1
```

```
m <- as.numeric(colSums(fitWeightedSanger$Z * weights[cohort=="Sanger"])/sum(weigh
ts[cohort=="Sanger"])) %*% coef(fitWeightedSanger)
plot(survfit(torontoSurv ~ exp(pT[,1]-as.numeric(m))>200, weights=weights[cohort==
"Toronto"]), col=set1[2:1], ylab="AML-free survival", xlab="Years after 1st sample
')
legend("bottomleft", c("HR < 200", "HR > 200"), lty=1, col=set1[2:1])
```

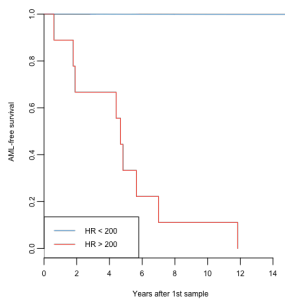

```
t <- seq(0,22,0.1)
a <- AUC.uno(s, torontoSurv, pT[,1], times=t)
plot(a$times, a$auc, xlab="Time [yr]", ylab="AUC", pch=16, col='grey')
lines(a$times, predict(loess(a$auc ~ a$times, span=0.25)))
abline(h=a$aiauc)
```

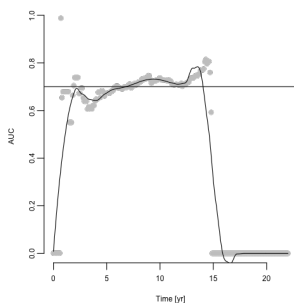

```
png("./figures/VCfit.DCdata.adj.coxph.auc.uno.png", width = 14, height = 14, units
= "cm", res = 500)
par(mar = c(4, 4, 4, 2) + 0.1, mgp=c(2.7,0.7,0), bty="L", tcl =-0.2, las = 1, cex
.lab = 1.1)
plot(a$times, a$auc, xlab="Time (years)", ylab="AUC", pch=16, col="grey80", ylim =
c(0,1.0))
lines(a$times, predict(loess(a$auc ~ a$times, span=0.25)))
abline(h=a$aiauc, lty = 3, lwd = 1)
mtext("VC fit, DC data", font = 2, side = 3, cex = 1, line = 0.5)
legend("bottomright", bty = "n", cex = 1.2, legend = paste("AUC = ",round(a$aiauc,2
)))#dev.off()
dev.off()
```

```
## pdf
## 2
```

## 7.4 Combined

### 7.4.1 Non-adjusted

```
fitAll <- CoxRFX(allX, allSurv, allGroups, which.mu=which.mu, sigma0=sigma0, nu=nu
)
fitAll
```

```
## Means:
##           mean   sd   z   p.val sig
## Genes      0.79 0.068 12 3.9e-31 ***
## Demographics 0.00 0.000  0    NA
##
## Variances - p-values only indicative:
##           sigma2 chisq df   p.val sig
## Genes      0.19   25 9.2 2.7e-03 **
## Demographics 0.48   25 2.7 1.2e-05 ***
##
## Partial log hazard:
##           Cov[g,g] Sum(Cov[,g])   MSE
## Genes      0.40      0.41 0.012
## Demographics 0.45      0.46 0.032
## TOTAL      NaN      0.88 0.044
```

```
WaldTest(fitAll, uncentered=FALSE)
```

```
##           group   coef coef-mu   sd     z df  p.value sig
## ASXL1_0.1     Genes -0.042129 -0.8326 0.12580 -0.3349 1 7.38e-01
## BCOR_0.1      Genes  0.018602 -0.7719 0.00792  2.3484 1 1.89e-02 *
## CBL_0.1       Genes -0.313214 -1.1037 0.20346 -1.5394 1 1.24e-01
## DNMT3A_0.1    Genes -0.233727 -1.0242 0.10840 -2.1561 1 3.11e-02 *
## IDH1_0.1      Genes  0.021937 -0.7685 0.20020  0.1096 1 9.13e-01
## IDH2_0.1      Genes -0.278283 -1.0687 0.15309 -1.8177 1 6.91e-02 .
## JAK2_0.1      Genes -0.030573 -0.8210 0.14841 -0.2060 1 8.37e-01
## KDM6A_0.1     Genes  0.000538 -0.7899 0.00638  0.0843 1 9.33e-01
## KMT2C_0.1     Genes  0.068877 -0.7216 0.08598  0.8011 1 4.23e-01
## KMT2D_0.1     Genes -0.391241 -1.1817 0.20457 -1.9125 1 5.58e-02 .
## KRAS_0.1      Genes  0.006235 -0.7842 0.01271  0.4907 1 6.24e-01
## NF1_0.1       Genes -0.020208 -0.8107 0.03223 -0.6270 1 5.31e-01
## NRAS_0.1      Genes  0.034555 -0.7559 0.01285  2.6887 1 7.17e-03 **
## PHF6_0.1      Genes  0.016466 -0.7740 0.01532  1.0749 1 2.82e-01
## PTPN11_0.1    Genes  0.360022 -0.4304 0.20817  1.7295 1 8.37e-02 .
## RAD21_0.1     Genes -0.006662 -0.7971 0.01823 -0.3654 1 7.15e-01
## RUNX1_0.1     Genes -0.399568 -1.1900 0.11410 -3.5019 1 4.62e-04 ***
## SF3B1_0.1     Genes  0.239576 -0.5509 0.20922  1.1451 1 2.52e-01
## SRSF2_0.1     Genes -0.290822 -1.0813 0.13577 -2.1420 1 3.22e-02 *
## TET2_0.1      Genes -0.158347 -0.9488 0.10442 -1.5165 1 1.29e-01
## TP53_0.1      Genes  0.686128 -0.1043 0.19933  3.4423 1 5.77e-04 ***
## U2AF1_0.1     Genes  0.711837 -0.0786 0.19998  3.5595 1 3.72e-04 ***
## age_10        Demographics -0.034319 -0.0343 0.10560 -0.3250 1 7.45e-01
## gender         Demographics -0.096757 -0.0968 0.18251 -0.5302 1 5.96e-01
## cohort         Demographics -1.297202 -1.2972 0.24120 -5.3781 1 7.53e-08 ***
## mu.Genes       NA  0.790457    NA    NA    NA 1    NA
## mu.Demographics NA  0.000000    NA    NA    NA 1    NA
```

```
survConcordance(allSurv ~ fitAll$linear.predictors)
```

```
## Call:
## survConcordance(formula = allSurv ~ fitAll$linear.predictors)
##
## n= 950
## Concordance= 0.8059859 se= 0.02746324
## concordant discordant tied.risk tied.time std(c-d)
## 61799.000 14873.000 8.000 1.000 4211.763
```

```
w <- c(which(allSurv[,1]==0)[-1]-1, nrow(allSurv))
s <- Surv(allSurv[w,2], allSurv[w,3])
t <- seq(0,22,0.1)
a <- AUC.uno(s, s, fitAll$linear.predictors[w], times=t)
plot(a$times, a$auc, xlab="Time [yr]", ylab="AUC", pch=16, col='grey')
lines(a$times, predict(loess(a$auc ~ a$times, span=0.25)))
abline(h=a$iauc)
```

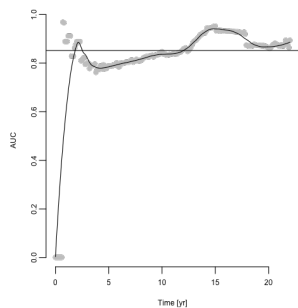

```
r <- survivalROC(Stime = s[,1], status=s[,2], marker=fitAll$linear.predictors[w]-c
olMeans(fitAll$Z[w,]) %*% fitAll$coefficients, predict.time = 10, method="NNE", sp
an=0.001)
plot(r$FPR, r$TP, type='s', xlab="FPR", ylab="TPR")
```

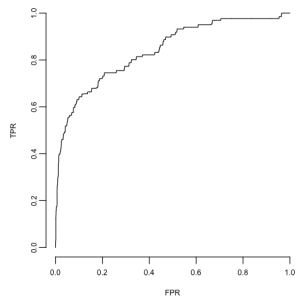

```
round(r$AUC, 3)
```

```
## [1] 0.84
```

## 7.4.2 Adjusted

```
fitWeighted <- CoxRFX(allX, allSurv, allGroups, which.mu=which.mu, sigma0=sigma0,
nu=nu, weights=weights)
waldWeighted <- WaldTest(fitWeighted)
```

```
##          group   coef coef-mu   sd      z df  p-value sig
## ASXL1_0.1   Genes  1.9907  0.0666 0.1328 14.985 1 9.18e-51 ***
## BCOR_0.1    Genes  2.1375  0.2134 0.1144 18.677 1 7.57e-78 ***
## CBL_0.1     Genes  0.3984 -1.5256 0.3634  1.096 1 2.73e-01
## DNMT3A_0.1  Genes  0.6589 -1.2652 0.1112  5.926 1 3.10e-09 ***
## IDH1_0.1    Genes  2.4306  0.5065 0.3313  7.337 1 2.18e-13 ***
## IDH2_0.1    Genes  0.8422 -1.0818 0.2181  3.862 1 1.13e-04 ***
## JAK2_0.1    Genes  1.8770 -0.0471 0.1954  9.607 1 7.44e-22 ***
## KDM6A_0.1   Genes  1.9370  0.0129 0.1241 15.607 1 6.51e-55 ***
## KMT2C_0.1   Genes  2.3674  0.4434 0.7114  3.328 1 8.75e-04 ***
## KMT2D_0.1   Genes  0.1632 -1.7609 0.4835  0.338 1 7.36e-01
## KRAS_0.1    Genes  1.9831  0.0590 0.1706 11.622 1 3.20e-31 ***
## NF1_0.1     Genes  1.5839 -0.3402 0.4410  3.592 1 3.29e-04 ***
## NRAS_0.1    Genes  2.3167  0.3926 0.1248 18.569 1 5.76e-77 ***
## PHF6_0.1    Genes  2.2266  0.3025 0.1241 17.937 1 6.04e-72 ***
## PTPN11_0.1  Genes  2.1631  0.2390 0.3107  6.962 1 3.35e-12 ***
## RAD21_0.1   Genes  1.8365 -0.0876 0.2512  7.311 1 2.65e-13 ***
## RUNX1_0.1   Genes  0.8106 -1.1134 0.1329  6.098 1 1.08e-09 ***
## SF3B1_0.1   Genes  3.1070  1.1829 0.3114  9.977 1 1.92e-23 ***
## SRSF2_0.1   Genes  1.3684 -0.5557 0.1491  9.176 1 4.47e-20 ***
## TET2_0.1    Genes  0.9527 -0.9714 0.1172  8.126 1 4.45e-16 ***
## TP53_0.1    Genes  5.0534  3.1293 0.3907 12.934 1 2.88e-38 ***
## U2AF1_0.1   Genes  4.1247  2.2006 0.3300 12.498 1 7.67e-36 ***
## age_10     Demographics -0.0962 -0.0962 0.0863 -1.114 1 2.65e-01
## gender     Demographics -0.0522 -0.0522 0.1044 -0.499 1 6.17e-01
## cohort     Demographics  0.0499  0.0499 0.0973  0.512 1 6.08e-01
```

```
survConcordance(fitWeighted$surv ~ fitWeighted$linear.predictor, weights=weights)
```

```
## Call:
## survConcordance(formula = fitWeighted$surv ~ fitWeighted$linear.predictor,
## weights = weights)
##
## n = 950
## Concordance= 0.7778849 se= 0.02802535
## concordant discordant tied.risk tied.time std(c-d)
## 6313552.2348 1802641.1313 317.7601 1.0000 454936.0746
```

### Dynamic/cumulative AUC

```
w <- c(which(allSurv[,1]==0)[-1]-1, nrow(allSurv))
survAll2 <- Surv(allSurv[w,2], allSurv[w,3])
t <- seq(0,22,0.1)
a <- AUC.uno(survAll2, survAll2, fitWeighted$linear.predictor[w], times=t)
plot(a$times, a$auc, xlab="Time [yr]", ylab="AUC", pch=16, col='grey')
lines(a$times, predict(loess(a$auc ~ a$times, span=0.25)))
abline(h=a$iauc)
```

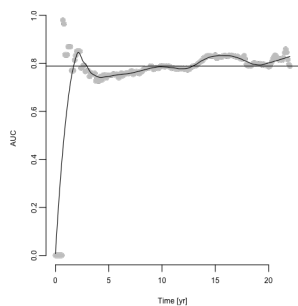

```
round(a$aiauc, 3)
```

```
## [1] 0.789
```

```
png("./figures/combined.adj.coxph.auc.uno.png", width = 14, height = 14, units = "
cm", res = 500)
par(mar = c(4, 4, 4, 2) + 0.1, mgp=c(2.7,0.7,0), bty="L", tcl =-0.2, las = 1, cex
.lab = 1.1)
plot(a$times, a$auc, xlab="Time (years)", ylab="AUC", pch=16, col="grey80", ylim =
c(0,1.0))
lines(a$times, predict(loess(a$auc ~ a$times, span=0.25)))
abline(h=a$aiauc, lty = 3, lwd = 1)
mtext("Combined adjusted Cox PH", font= 2, side = 3, cex = 1, line = 0.5)
legend("bottomright", bty = "n", cex = 1.2, legend = paste("AUC = ",round(a$aiauc,2
)))
dev.off()
```

```
## pdf
## 2
```

#### Time-depenent ROC

```
r <- survivalROC(stime = survAll2[,1], status=survAll2[,2], marker=fitWeighted$lin
ear.predictors[w]-colMeans(fitWeighted$Z[w,]) %*% fitWeighted$coefficients, predic
t.time = 10, method="NNE", span=0.001)
round(r$aAUC, 3)
```

```
## [1] 0.791
```

```
png("./figures/Combined.adj.coxph.roct.png", width = 14, height = 14, units = "cm"
, res = 500)
par(mar = c(4, 4, 4, 2) + 0.1, mgp=c(2.7,0.7,0), bty="L", tcl =-0.2, las = 1, cex
.lab = 1.1)
plot(r$FP, r$TP, type='s',
xlab="False Positive Rate", ylab="True Positive Rate",
col = "black")
mtext("Combined adjusted Cox PH", font= 2, side = 3, cex = 1, line = 0.5)
abline(a = 0, b = 1, col = "grey70", lty = 1, lwd = 1)
legend("bottomright", bty = "n", cex = 1.2, legend = paste("AUC = ",round(r$aAUC,2
)))
dev.off()
```

```
## pdf
## 2
```

### 7.4.3 Bootstrap

```
coefWeightedBoot <- sapply(1:100, function(foo){
  set.seed(foo)
  b <- unique(sample(1:nrow(allX), replace=TRUE))
  fitWeighted <- CoxRFX(allX[b,], allSurv[b,], allGroups, which.mu=which
.mu, sigma0=sigma0, nu=5, weights=weights[b])
  c(coef(fitWeighted), 'mu.Genes'=fitWeighted$mu["Genes"])
})
```

```
concBoots <- sapply(1:100, function(foo){
  set.seed(foo)
  b <- unique(sample(1:nrow(allX), replace=TRUE))
  oob <- !1:nrow(allX) %in% b
  c(inb=as.numeric(survConcordance(allSurv[b,]- as.matrix(allX)[b,]) %*%
coefWeightedBoot[-26,foo], weights=weights[b])$concordance),
  oob=as.numeric(survConcordance(allSurv[oob,]- as.matrix(allX)[
oob,]) %*% coefWeightedBoot[-26,foo],weights=weights[oob])$concordance),
  auc = AUC.uno(survAll2[oob[w,],], survAll2[oob[w,],], as.matrix(
allX)[w,][oob[w,],]) %*% coefWeightedBoot[-26,foo], times=t)$iauc
})
apply(concBoots,1,quantile)
```

```
##          inb          oob          auc
## 0%    0.7127155 0.6414249 0.6163769
## 25%    0.7623231 0.7282023 0.7333587
## 50%    0.7757864 0.7643297 0.7833229
## 75%    0.7985773 0.7875492 0.8223659
## 100%   0.8519811 0.8713292 0.8805585
```

### 7.4.4 Forest plot

Figure 2

```

png("./figures/Combined.adj.coxph.boostrapped.forest.png", width = 18.5, height =
19, units = "cm", res = 800)
par(bty="n", mar=c(3,6,3,15)+.5, mgp=c(2,0.5,0), xpd=FALSE, tcl=-.25)
c <- c(waldWeighted[-25, "coef"], "mu"=fitWeighted$mu["Genes"]); names(c)[1:24] <-
rownames(waldWeighted)[-25]
o <- c(23:24,1:22,25)
s <- c(rep(1,2), rep(.5, 23))
c <- exp(c*c(rep(0.5,22), c(1,1),0.5))

ci <- apply(coefWeightedBoot,1,quantile, c(0.025,0.975))[,,-25] * rep(c(rep(0.5,22)
, c(1,1),0.5), each=2)
y <- rev(seq_along(c))
plot(c[o], y, xlab="Hazard ratio", log='x', ylab='', xaxt = "n", yaxt="n", pch=NA,
xlim=c(0.5,50))
atx <- axTicks(1)
axis(1,at=atx,labels=atx)
abline(h=y, col="#EEEEEE", lty=1)
abline(v=1, lty=1, col="grey")
abline(v=c("mu.Genes"), col=mg14::colTrans("#57B2AB"), lty=1)
segments(exp(ci[1,o]), y, exp(ci[2,o]),y)
points(c[o], y, xlab="Relative risk", bg=set1[3], cex=2, pch=c(rep(21,24), 23))
m <- match(names(c)[o],rownames(waldWeightedToronto))[-25]
points(exp(c(waldWeightedToronto$coef[m], fitWeightedToronto$mu["Genes"])*s), y,bg
=set1[4], pch=c(rep(21,24), 23), cex=1)
m <- match(names(c)[o],rownames(waldWeightedSanger))[-25]
points(exp(c(waldWeightedSanger$coef[m], fitWeightedSanger$mu["Genes"])*s), y,bg=s
et1[5], pch=c(rep(21,24), 23), cex=1)
mtext(side=2, sub("mu.Genes","Av. gene", sub("_."+",", sub("age", "Age", sub("gend
er", "Gender", names(c)[o]))), at=y, las=2, font=c(1,1,rep(3,22),1))
r <- sapply(split(as.data.frame(allX>0), control), colMeans)
f <- sapply(split(allX, control), apply, 2, function(x) mean(x[x>0]))
par(xpd=NA)
points(rep(100,22),y[3:24], cex=sqrt(r[o[3:24],2]*10), pch=21, bg=set1[2])
points(rep(100*1.5,22), y[3:24], cex=sqrt(r[o[3:24],1]*10), pch=21, bg=set1[1])
points(rep(360,22),y[3:24], cex=sqrt(f[o[3:24],2]), pch=21, bg=set1[2])
points(rep(360*1.5,22), y[3:24], cex=sqrt(f[o[3:24],1]), pch=21, bg=set1[1])
legend(x=0.5, y=28, pch=21, pt.bg=set1[c(4,5,3)], c("DC","VC","Combined"), bty="n"
, ncol=3, text.width=0.35)
text(y=24, x=100, "      Recurrence")
text(y=24, x=360*1.5, "VAF")
axis(1, at=c(100,100*1.5), c("Control ", "Pre-AML "), las=2, line=-1)
axis(1, at=c(360,360*1.5), c("Control ", "Pre-AML "), las=2, line=-1)
dev.off()

```

```

## pdf
## 2

```

## 7.4.5 Dichotomous variables

```

allXDich <- allX
allXDich[allGroups=="Genes"] <- (allXDich[allGroups=="Genes"] > 0) + 0
fitWeightedDich <- CoxRFX(allXDich, allSurv, allGroups, which.mu=which.mu, sigma0=
sigma0, nu=nu, weights=weights)

WaldTest(fitWeightedDich)

```

```

##          group      coef coef-mu      sd      z df p.value sig
## ASXL1_0.1    Genes  1.3797 -0.3942 0.3175  4.3456 1 1.39e-05 ***
## BCOR_0.1     Genes  2.5308  0.7570 0.8406  3.0106 1 2.61e-03  **
## CBL_0.1      Genes  0.3932 -1.3806 0.4991  0.7879 1 4.31e-01
## DNMT3A_0.1   Genes  0.7794 -0.9944 0.2049  3.8048 1 1.42e-04 ***
## IDH1_0.1     Genes  2.0403  0.2665 0.5817  3.5073 1 4.53e-04 ***
## IDH2_0.1     Genes  3.9907  2.2169 0.5363  7.4414 1 9.96e-14 ***
## JAK2_0.1     Genes  3.2315  1.4577 0.3911  8.2629 1 1.42e-16 ***
## KDM6A_0.1    Genes  0.7396 -1.0343 0.7822  0.9456 1 3.44e-01
## KMT2C_0.1    Genes -0.4630 -2.2368 0.5910 -0.7834 1 4.33e-01
## KMT2D_0.1    Genes  0.8142 -0.9597 0.9409  0.8653 1 3.87e-01
## KRAS_0.1     Genes -0.0209 -1.7948 0.7030 -0.0298 1 9.76e-01
## NF1_0.1      Genes -1.1385 -2.9124 0.8236 -1.3824 1 1.67e-01
## NRAS_0.1     Genes  1.6320 -0.1419 0.7812  2.0891 1 3.67e-02  *
## PHF6_0.1     Genes  4.0915  2.3176 0.7069  5.7883 1 7.11e-09 ***
## PTPN11_0.1   Genes  2.2597  0.4859 0.6548  3.4510 1 5.59e-04 ***
## RAD21_0.1    Genes  1.0923 -0.6816 0.9283  1.1767 1 2.39e-01
## RUNX1_0.1    Genes  2.6557  0.8818 0.5738  4.6284 1 3.69e-06 ***
## SF3B1_0.1    Genes  0.0815 -1.6924 0.6027  0.1352 1 8.92e-01
## SRSF2_0.1    Genes  4.2431  2.4693 0.3084 13.7566 1 4.65e-43 ***
## TET2_0.1     Genes  0.9715 -0.8023 0.2351  4.1328 1 3.58e-05 ***
## TP53_0.1     Genes  2.0033  0.2295 0.4168  4.8067 1 1.53e-06 ***
## U2AF1_0.1    Genes  5.7172  3.9433 0.4178 13.6831 1 1.28e-42 ***
## age_10      Demographics -0.3024 -0.3024 0.0958 -3.1571 1 1.59e-03  **
## gender      Demographics -0.0512 -0.0512 0.1362 -0.3759 1 7.07e-01
## cohort      Demographics  0.2569  0.2569 0.1435  1.7896 1 7.35e-02  .

```

```

survConcordance(allSurv ~ fitWeightedDich$linear.predictors, weights=weights)

```

```

## Call:
## survConcordance(formula = allSurv ~ fitWeightedDich$linear.predictors,
## weights = weights)
##
## n = 950
## Concordance = 0.764251 se = 0.02802535
## concordant discordant tied.risk tied.time std(c-d)
## 6202805.3608 1913213.1798 492.5856 1.0000 454936.0734

```

## 7.4.6 Bootstrap adjustment

To compare to the weighted CoxRFX models



```

set.seed(42)

p <- c(rep(n_total_sanger, sum(cohort=="Sanger" & control)), rep(n_total_toronto,
sum(cohort=="Toronto" & control)))
b42 <- c(sample(which(control), size=round(n_total) - sum(!control), prob=p, repla
ce=TRUE), which(!control))

fitBoot <- CoxRFX(allX[b42,], allSurv[b42,], allGroups, which.mu=which.mu, sigma0=
sigma0, nu=nu)

set.seed(42)
b <- c(sample(which( sangerData$Diagnosis=="Control"), size=round(n_total_sanger)
- sum(sangerData$Diagnosis!="Control"), replace=TRUE), which(sangerData$Diagnosis!
=="Control"))

fitBootSanger <- CoxRFX(sangerX[b,], sangerSurv[b,], sangerGroups, which.mu=which.
mu, sigma0=sigma0, nu=nu)

survConcordance(fitBootSanger$surv ~ fitBootSanger$linear.predictors)

```

```

## Call:
## survConcordance(formula = fitBootSanger$surv ~ fitBootSanger$linear.predictors)
##
## n= 10407
## Concordance= 0.8334695 se= 0.05475909
## concordant discordant tied.risk tied.time std(c-d)
## 140833.0 28139.0 0.0 0.0 18505.5

```

```
waldBootSanger <- WaldTest(fitBootSanger)
```

```

##          group      coef coef-mu      sd      z df p.value sig
## ASXL1_0.1 Genes 2.75130 0.85036 0.44987 6.1157 1 9.61e-10 ***
## CBL_0.1 Genes 0.90179 -0.99914 1.17452 0.7678 1 4.43e-01
## DNMT3A_0.1 Genes 0.75840 -1.14254 0.22408 3.3845 1 7.13e-04 ***
## JAK2_0.1 Genes -0.20568 -2.10662 0.92220 -0.2230 1 8.24e-01
## KMT2C_0.1 Genes 2.16912 0.26819 0.96833 2.2401 1 2.51e-02 *
## KMT2D_0.1 Genes 0.06618 -1.83475 0.76576 0.0864 1 9.31e-01
## KRAS_0.1 Genes 2.31066 0.40972 0.38106 6.0638 1 1.33e-09 ***
## NF1_0.1 Genes 1.57512 -0.32581 0.77819 2.0241 1 4.30e-02 *
## NRAS_0.1 Genes 1.84937 -0.05157 0.35761 5.1715 1 2.32e-07 ***
## RAD21_0.1 Genes 1.70593 -0.19501 0.58727 2.9049 1 3.67e-03 **
## SF3B1_0.1 Genes 1.54550 -0.35544 0.87032 1.7758 1 7.58e-02 .
## SRSF2_0.1 Genes 1.40565 -0.49529 0.27962 5.0271 1 4.98e-07 ***
## TET2_0.1 Genes 1.25279 -0.64815 0.13571 9.2317 1 2.66e-20 ***
## TP53_0.1 Genes 4.63845 2.73751 0.89272 5.1959 1 2.04e-07 ***
## U2AF1_0.1 Genes 5.78946 3.88853 0.73724 7.8528 1 4.07e-15 ***
## age_10 Demographics 0.04278 0.04278 0.11873 0.3603 1 7.19e-01
## gender Demographics -0.01852 -0.01852 0.10088 -0.1836 1 8.54e-01
## systol_100 Blood 0.02344 0.02344 0.04556 0.5145 1 6.07e-01
## diastol_100 Blood 0.04133 0.04133 0.03020 1.3686 1 1.71e-01
## bmi_10 Blood 0.14916 0.14916 0.08426 1.7702 1 7.67e-02 .
## cholestl_10 Blood 0.00303 0.00303 0.01547 0.1958 1 8.45e-01
## triglyc Blood -0.02770 -0.02770 0.11803 -0.2347 1 8.14e-01
## hdl Blood -0.12117 -0.12117 0.08479 -1.4291 1 1.53e-01
## ldl Blood 0.13479 0.13479 0.11448 1.1775 1 2.39e-01
## lym Blood 0.08408 0.08408 0.10435 0.8057 1 4.20e-01
## mcv_100 Blood -0.02485 -0.02485 0.00798 -3.1160 1 1.83e-03 **
## rdw_10 Blood 0.06629 0.06629 0.01703 3.8934 1 9.88e-05 ***
## wbc_10 Blood 0.01199 0.01199 0.04735 0.2532 1 8.00e-01
## plt_100 Blood 0.09163 0.09163 0.10006 0.9158 1 3.60e-01
## hgb_10 Blood 0.03986 0.03986 0.02497 1.5960 1 1.10e-01

```

```

set.seed(42)
b <- c(sample(which( torontoData$Diagnosis=="Control"), size=round(n_total_toronto)
) - sum(torontoData$Diagnosis!="Control"), replace=TRUE), which(torontoData$Diagno
sis!="Control"))

fitBootToronto <- CoxRFX(torontoX[b,], torontoSurv[b,], torontoGroups, which.mu=wh
ich.mu, sigma0=sigma0, nu=nu)

survConcordance(fitBootToronto$surv ~ fitBootToronto$linear.predictors)

```

```

## Call:
## survConcordance(formula = fitBootToronto$surv ~ fitBootToronto$linear.predictor
s)
##
## n= 72378
## Concordance= 0.7750173 se= 0.03055346
## concordant discordant tied.risk tied.time std(c-d)
## 4722585.0 1370937.0 0.0 1.0 372356.4

```

```
waldWeightedToronto <- WaldTest(fitBootToronto)
```

| ##            | group        | coef    | coef-mu  | sd     | z      | df | p.value  | sig |
|---------------|--------------|---------|----------|--------|--------|----|----------|-----|
| ## ASXL1_0.1  | Genes        | 1.9494  | 0.01801  | 0.1451 | 13.430 | 1  | 4.03e-41 | *** |
| ## CALR_0.1   | Genes        | 0.9415  | -0.98990 | 0.7233 | 1.302  | 1  | 1.93e-01 |     |
| ## CBL_0.1    | Genes        | 0.3663  | -1.56509 | 0.3604 | 1.016  | 1  | 3.09e-01 |     |
| ## DNMT3A_0.1 | Genes        | 0.7358  | -1.19559 | 0.1243 | 5.921  | 1  | 3.20e-09 | *** |
| ## IDH1_0.1   | Genes        | 2.3973  | 0.46594  | 0.3355 | 7.145  | 1  | 8.98e-13 | *** |
| ## IDH2_0.1   | Genes        | 0.8078  | -1.12360 | 0.2283 | 3.538  | 1  | 4.03e-04 | *** |
| ## JAK2_0.1   | Genes        | 1.9240  | -0.00738 | 0.1822 | 10.562 | 1  | 4.49e-26 | *** |
| ## KDM6A_0.1  | Genes        | 1.9436  | 0.01219  | 0.1340 | 14.506 | 1  | 1.12e-47 | *** |
| ## KMT2C_0.1  | Genes        | 2.4194  | 0.48806  | 0.6410 | 3.774  | 1  | 1.60e-04 | *** |
| ## KRAS_0.1   | Genes        | 1.8282  | -0.10316 | 0.1559 | 11.725 | 1  | 9.46e-32 | *** |
| ## NF1_0.1    | Genes        | 1.8677  | -0.06366 | 0.1512 | 12.353 | 1  | 4.69e-35 | *** |
| ## PHF6_0.1   | Genes        | 2.1755  | 0.24415  | 0.1302 | 16.711 | 1  | 1.08e-62 | *** |
| ## PTPN11_0.1 | Genes        | 2.5369  | 0.60555  | 0.2217 | 11.445 | 1  | 2.49e-30 | *** |
| ## RUNX1_0.1  | Genes        | 0.7795  | -1.15181 | 0.1359 | 5.738  | 1  | 9.57e-09 | *** |
| ## SF3B1_0.1  | Genes        | 3.1337  | 1.20231  | 0.3091 | 10.138 | 1  | 3.76e-24 | *** |
| ## SRSF2_0.1  | Genes        | 1.4023  | -0.52910 | 0.1703 | 8.235  | 1  | 1.80e-16 | *** |
| ## TET2_0.1   | Genes        | 0.6503  | -1.28104 | 0.2012 | 3.232  | 1  | 1.23e-03 | **  |
| ## TP53_0.1   | Genes        | 4.8664  | 2.93502  | 0.4220 | 11.532 | 1  | 9.14e-31 | *** |
| ## U2AF1_0.1  | Genes        | 3.9705  | 2.03910  | 0.3601 | 11.025 | 1  | 2.89e-28 | *** |
| ## age_10     | Demographics | -0.0891 | -0.08907 | 0.0998 | -0.892 | 1  | 3.72e-01 |     |
| ## gender     | Demographics | -0.0449 | -0.04493 | 0.1114 | -0.403 | 1  | 6.87e-01 |     |

#### Compare results

```

i <- intersect(rownames(waldBootSanger), rownames(waldWeightedToronto))
plot( waldWeightedToronto[i,"coef"], waldBootSanger[i, "coef"], xlab="Coef Discovery (adjusted)", ylab="Coef Validation (adjusted)", pch=19, cex=1)#sqrt(colMeans(rbind(sangerX[,i], torontoX[,i])>0)*100))
segments(waldWeightedToronto[i,"coef"] - 2*waldWeightedToronto[i,"sd"], waldBootSanger[i, "coef"], waldWeightedToronto[i,"coef"] + 2*waldWeightedToronto[i,"sd"], waldBootSanger[i, "coef"], col="grey")
segments(waldWeightedToronto[i,"coef"], waldBootSanger[i, "coef"]- 2*waldBootSanger[i,"sd"], waldWeightedToronto[i,"coef"], waldBootSanger[i, "coef"] +2*waldBootSanger[i,"sd"], col="grey")
text(labels=sub("_.+", "", i), waldWeightedToronto[i,"coef"], waldBootSanger[i, "coef"], pos=2, adj=c(0,1))
abline(0,1)

```

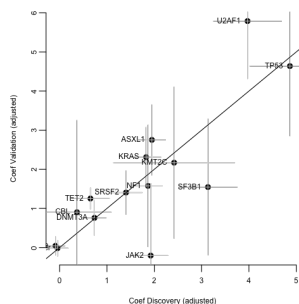

```

plot( waldToronto[i,"coef"], waldSanger[i, "coef"], xlab="Coef Discovery (raw)", ylab="Coef Validation (raw)", pch=19, cex=1, ylim=c(0,5), xlim=c(0,5)#sqrt(colMeans(rbind(sangerX[,i], torontoX[,i])>0)*100))
segments(waldToronto[i,"coef"] - 2*waldToronto[i,"sd"], waldSanger[i, "coef"], waldToronto[i,"coef"] + 2*waldToronto[i,"sd"], waldSanger[i, "coef"], col="grey")
segments(waldToronto[i,"coef"], waldSanger[i, "coef"]- 2*waldSanger[i,"sd"], waldToronto[i,"coef"], waldSanger[i, "coef"] +2*waldSanger[i,"sd"], col="grey")
text(labels=sub("_.+", "", i), waldToronto[i,"coef"], waldSanger[i, "coef"], pos=2, adj=c(0,1))
abline(0,1)

```

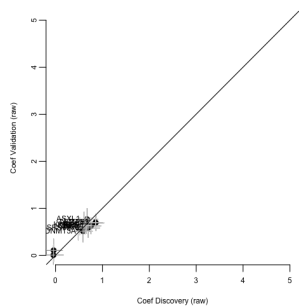

### 7.4.7 LOOCV

```

samples <- factor(c(as.character(sangerData$Individual), as.character(torontoData$Sample)))

```

```

looAll <- do.call("rbind",mclapply(levels(samples), function(l){
  i <- samples!=l
  f <-< CoxRFX(allX[i,], allSurv[i,], allGroups, which.mu=which.
mu, sigma0=sigma0, nu=nu)
  p <- as.matrix(allX[!i,,drop=FALSE]) %*% f$coefficients
  r <- cbind(matrix(f$coefficients, nrow=length(p), ncol=length(
f$coefficients), byrow=TRUE), linear.predictor=p)
  colnames(r) <- c(names(f$coefficients), "linear.predictor")
  as.data.frame(r)
}, mc.cores=4))
looAll <- looAll[order(order(samples)),]
pp <- looAll$linear.predictor

c <- rbind(
  `Toronto (fit)`=as.data.frame(survConcordance(torontoSurv ~ fitToronto$lin
ear.predictors)[c("concordance", "std.err")]),
  `Toronto (val)`=as.data.frame(survConcordance(sangerSurv ~ pS[,1])[c("conc
ordance", "std.err")]),
  `Sanger (fit)`=as.data.frame(survConcordance(sangerSurv ~ fitSanger$linear
.predictors)[c("concordance", "std.err")]),
  `Sanger (val)`=as.data.frame(survConcordance(torontoSurv ~ pT[,1])[c("conc
ordance", "std.err")]),
  `Combined (fit)`=as.data.frame(survConcordance(allSurv ~ fitAll$linear.pre
dictors)[c("concordance", "std.err")]),
  `Combined (val)`=as.data.frame(survConcordance(allSurv ~ pp)[c("concordanc
e", "std.err")]))

c

```

|                | concordance<br><dbl> | std.err<br><dbl> |
|----------------|----------------------|------------------|
| Toronto (fit)  | 0.7426378            | 0.03079247       |
| Toronto (val)  | 0.8069747            | 0.05514445       |
| Sanger (fit)   | 0.7939150            | 0.05514512       |
| Sanger (val)   | 0.7000180            | 0.03079247       |
| Combined (fit) | 0.8059859            | 0.02746324       |
| Combined (val) | 0.7847548            | 0.02746328       |

6 rows

```

par(mar=c(5,3,1,1), mgp=c(2,.5,0))
b <- barplot(c$concordance-0.5, ylab="Concordance", col=rev(RColorBrewer::brewer.p
al(6,"Paired")), ylim=c(0.5,0.88), offset=0.5)
mg14::rotatedLabel(x=b, labels=rownames(c))
segments(b,c$concordance+c$std.err,b,c$concordance-c$std.err)

```

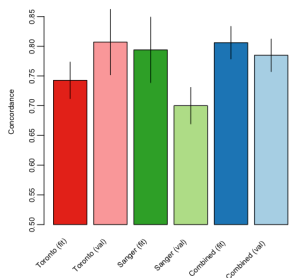

```

w <- c(which(allSurv[,1]==0)[-1]-1, nrow(allSurv))
survAll2 <- Surv(allSurv[w,2], allSurv[w,3])
t <- seq(0,22,0.1)
a <- AUC.uno(survAll2, survAll2, looAll$linear.predictor[w], times=t)
plot(a$times, a$auc, xlab="Time [yr]", ylab="AUC", pch=16, col='grey')
lines(a$times, predict(loess(a$auc ~ a$times, span=0.25)))
abline(h=a$iauc)

```

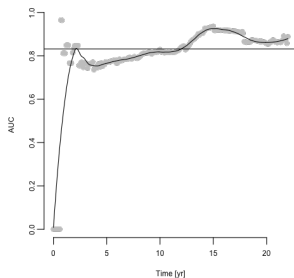

```
round(a$iauc, 3)
```

```
## [1] 0.832
```

```

r <- survivalROC(stime = survAll2[,1], status=survAll2[,2], marker=looAll$linear.p
redictor[w], predict.time = 10, method="NNE", span=0.001)#0.25*nrow(s)^(-0.20)
plot(r$FPR, r$TP, type='s', xlab="FPR", ylab="TPR")

```

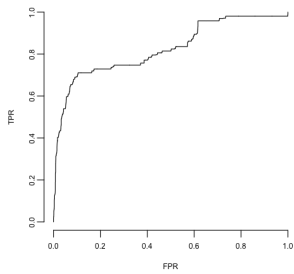

```
round(r$AUC, 3)
```

```
## [1] 0.825
```

#### 7.4.7.1 Individual Predictions (non-adjusted)

```
plot(survfit(allSurv~1), conf.int=FALSE, xlab='Time after first sample [yr]', ylab='Predicted AML-free fraction', col='white', bty='L', yaxs='i', ylim=c(0,1.01))
d <- data.frame(t=NULL, s=NULL, pch=NULL, col=character())
for(i in unique(samples)){
  km <- exp(predict(smooth.spline(log(summary(survfit(allSurv[samples!=i, ])-1), t
imes=t)$surv), df=10))$y)
  lo <- colMeans(fitAllSZ[samples!=i, drop=FALSE]) %*% as.numeric(looAll[samples
==i, ][1, colnames(fitAllSZ)])
  kmi <- function(km, s, lp, lo){
    .kmi <- function(km, sj, lpj, lo) km[t >= sj[,1] & t <= sj[,2]]^exp(lpj-lo
)
    k0 <- 1
    for(j in 1:nrow(s)) {
      k <- .kmi(km, s[j, ], lp[j], lo)
      k <- k * k0/k[1]
      w <- t >= s[j,1] & t <= s[j,2]
      k0 <- k[length(k)]
      c <- if(s[nrow(s),3]==1) set1[1] else set1[2]
      #if(c==set1[1]) next
      lines(t[w], k, col=mg14::colTrans(c), type='l')
      p <- if(s[j,3]==1) 19 else 1
      #points(t[w][length(k)], k[length(k)], col=c, pch=p)
      d <-- rbind(d, data.frame(t=t[w][length(k)], s=k[length(k)], pch=p, co
l=c))
    }
  }
  kmi(km, allSurv[samples==i, ], looAll$linear.predictor[samples==i, ], lo)
}
points(d$t, d$s, pch=d$pch, col=as.character(d$col))
legend("bottomright", pch=c(1,1,19), col=c(set1[2], set1[1], set1[1]), legend=c("C
ontrol", "Progressor (pre-AML)", "Progressor (AML)", bty='n')
```

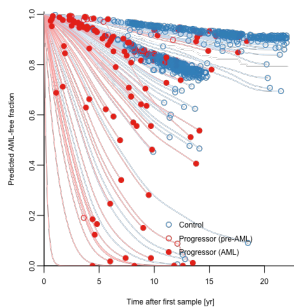

#### 7.4.7.2 Jackknife variance

```
i <- !duplicated(samples)
coef.jack <- colMeans(looAll[i,-ncol(looAll)])
var.jack <- rowSums((t(looAll[i,-ncol(looAll)]) - coef.jack)^2) * (sum(i)-1)/sum(i)

p.jack <- pchisq(coef.jack^2/var.jack,1, lower.tail=FALSE)

data.frame(coef.jack, p.jack, sig=mg14::sig2star(p.jack), n=colSums(allX[i,]>0))
```

|            | coef.jack<br><dbl> | p.jack sig<br><dbl> <fctr> | n<br><dbl> |
|------------|--------------------|----------------------------|------------|
| ASXL1_0.1  | 0.74835623         | 1.277998e-05 ***           | 26         |
| BCOR_0.1   | 0.80859507         | 2.311062e-04 ***           | 1          |
| CBL_0.1    | 0.47795378         | 3.123703e-01               | 12         |
| DNMT3A_0.1 | 0.55685260         | 7.358773e-06 ***           | 194        |
| IDH1_0.1   | 0.81211760         | 5.586147e-10 ***           | 3          |
| IDH2_0.1   | 0.51251777         | 1.351015e-01               | 6          |
| JAK2_0.1   | 0.75979214         | 3.181470e-08 ***           | 10         |
| KDM6A_0.1  | 0.79059980         | 7.666406e-05 ***           | 3          |
| KMT2C_0.1  | 0.85878619         | 5.304616e-04 ***           | 6          |
| KMT2D_0.1  | 0.40005469         | 3.584861e-01               | 1          |

1-10 of 25 rows      Previous 1 2 3 Next

## 7.4.8 Multiple bootstraps

```
save(file="boot.RData", control, allX, allSurv, sigma0, nu, which.mu, allGroups, n_total, cohort, p)
```

```
fitBoots <- simplify2array(mclapply(1:100, function(foo){
  set.seed(foo)
  w <- which(control)
  s <- sample(seq_along(which(control)), replace=TRUE)
  b <- c(sample(which(control)[s], size=round(n_total) - sum(!control), prob=p[s], replace=TRUE), sample(which(!control), replace=TRUE))
  fitBoot <- CoxRFX(allX[b,], allSurv[b,], allGroups, which.mu=w, which.mu=which.mu, sigma0=sigma0, nu=nu)
  fitBoot$coefficients
}, mc.cores=4))
save(fitBoots, file="fitBoots.RData")
```

```
load('fitBoots.RData')
```

```
WaldTest(fitBoot)
```

```
##          group      coef coef-mu      sd      z df  p-value sig
## ASXL1_0.1 Genes  1.9782  0.0682  0.1330 14.873  1 4.90e-50 ***
## BCOR_0.1  Genes  2.1204  0.2104  0.1157 18.319  1 5.81e-75 ***
## CBL_0.1   Genes  0.3747 -1.5352  0.3614  1.037  1 3.00e-01
## DNMT3A_0.1 Genes  0.6499 -1.2600  0.1133  5.735  1 9.77e-09 ***
## IDH1_0.1  Genes  2.4215  0.5116  0.3299  7.341  1 2.12e-13 ***
## IDH2_0.1  Genes  0.8614 -1.0486  0.2191  3.931  1 8.47e-05 ***
## JAK2_0.1  Genes  1.8708 -0.0391  0.1956  9.562  1 1.15e-21 ***
## KDM6A_0.1 Genes  1.9211  0.0112  0.1251 15.363  1 2.92e-53 ***
## KMT2C_0.1 Genes  2.3935  0.4836  0.7067  3.387  1 7.07e-04 ***
## KMT2D_0.1 Genes  0.1309 -1.7790  0.4810  0.272  1 7.86e-01
## KRAS_0.1  Genes  1.9602  0.0503  0.1717 11.415  1 3.53e-30 ***
## NF1_0.1   Genes  1.5704 -0.3396  0.4386  3.580  1 3.43e-04 ***
## NRAS_0.1  Genes  2.3060  0.3960  0.1213 19.014  1 1.31e-80 ***
## PHF6_0.1  Genes  2.2127  0.3028  0.1241 17.835  1 3.80e-71 ***
## PTPN11_0.1 Genes  2.1333  0.2233  0.3110  6.860  1 6.86e-12 ***
## RAD21_0.1  Genes  1.8285 -0.0815  0.2524  7.244  1 4.36e-13 ***
## RUNX1_0.1  Genes  0.8075 -1.1025  0.1325  6.095  1 1.10e-09 ***
## SF3B1_0.1  Genes  3.0963  1.1863  0.3107  9.967  1 2.13e-23 ***
## SRSF2_0.1  Genes  1.3408 -0.5692  0.1503  8.923  1 4.55e-19 ***
## TET2_0.1  Genes  0.9202 -0.9897  0.1179  7.807  1 5.85e-15 ***
## TP53_0.1  Genes  5.0203  3.1104  0.3921 12.803  1 1.57e-37 ***
## U2AF1_0.1  Genes  4.0999  2.1900  0.3306 12.402  1 2.54e-35 ***
## age_10   Demographics -0.0761 -0.0761  0.0912 -0.835  1 4.04e-01
## gender   Demographics -0.0530 -0.0530  0.1157 -0.458  1 6.47e-01
## cohort   Demographics  0.1992  0.1992  0.1103  1.806  1 7.09e-02 .
```

```
boxplot(t(fitBoots), ylim=c(-1,20))
points(fitBoot$coefficients, pch="*", col='red')
```

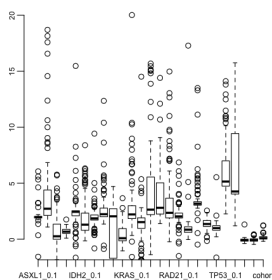

Concordance on out of bag samples

```

concBoots <- sapply(1:100, function(foo){
  set.seed(foo)
  w <- which(control)
  s <- sample(seq_along(which(control)), replace=TRUE)
  b <- c(sample(which(control)[s], size=round(n_total) - sum(!control),
  prob=p[s], replace=TRUE), sample(which(!control), replace=TRUE))
  oob <- 1:nrow(allX) %in% b
  oos <- c(sample(which(oob & control), size=round(n_total) - sum(!control),
  replace=TRUE), sample(which(oob&!control), size=sum(!control), replace=TRUE))
  c(inb=as.numeric(survConcordance(allSurv[b,]- as.matrix(allX)[b,] %>%
  fitBoots[,foo])$concordance),
  oob=as.numeric(survConcordance(allSurv[oob,]- as.matrix(allX)[
  oob,] %>% fitBoots[,foo])$concordance),
  oos=as.numeric(survConcordance(allSurv[oos,]- as.matrix(allX)[
  oos,] %>% fitBoots[,foo])$concordance)
  )
})

```

```

looAllWeighted <- do.call("rbind",mclapply(levels(samples), function(l){
  i <- samples!=l
  f <-< CoxRFX(allX[i,], allSurv[i,], allGroups, which.mu=which.
  mu, sigma0=sigma0, nu=nu, weights=weights[i])
  p <- as.matrix(allX[!i,drop=FALSE]) %>% f$coefficients
  r <- cbind(matrix(f$coefficients, nrow=length(p), ncol=length(
  f$coefficients), byrow=TRUE), linear.predictor=p)
  colnames(r) <- c(names(f$coefficients), "linear.predictor")
  as.data.frame(r)
  }, mc.cores=4))
looAllWeighted <- looAllWeighted[order(order(samples)),]
pp <- looAllWeighted$linear.predictor
survConcordance(allSurv ~ pp, weights=weights)

```

```

## Call:
## survConcordance(formula = allSurv ~ pp, weights = weights)
##
## n= 950
## Concordance= 0.7561883 se= 0.02802535
## concordant discordant tied.risk tied.time std(c-d)
## 6137610.4 1978900.7 0.0 1.0 454936.2

```

```

h <- exp(looAllWeighted$linear.predictor) > 100
plot(survfit(allSurv ~ h, weights=weights), col=set1[2:1], ylab="AML-free survival",
  xlab="Time after first sample")
f <- sum(h*weights)/sum(weights) *100
legend("bottomleft", lty=1, col=set1[2:1], paste(c("low risk", "high risk"), "n -",
  round(c(100-f,f), 2), "%"))

```

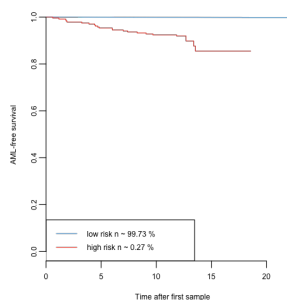

## 7.4.9 Individual Predictions with corrected baseline

```

plot(survfit(allSurv~1), conf.int=FALSE, xlab='Time after first sample [yr]', ylab=
  'Predicted AML-free fraction', col='white', bty='L', yaxs='i', ylim=c(0,1.01))
d <- data.frame(t=NULL, s=NULL, pch=NULL, col=character())
for(i in unique(samples)){
  km <- exp(predict(smooth.spline(log(summary(survfit(allSurv[samples!=i,]-1, we
  ights=weights[samples!=i]), times=t)$surv, df=10))$y)
  l0 <- colSums(fitAllZ[samples!=i,drop=FALSE] * weights[samples!=i]) %>% as.n
  umeric(looAllWeighted[samples==i,][1,colnames(fitAllZ)]) / sum(weights[samples!=i
  ])
  kmi <- function(km, s, lp, l0){
    .kmi <- function(km, sj, lpj, l0) km[t >= sj[,1] & t <= sj[,2]]^exp(lpj-l0)
  }
  k0 <- 1
  for(j in 1:nrow(s)) {
    k <- .kmi(km, s[j,], lp[j], l0)
    k <- k * k0/k[1]
    w <- t >= s[j,1] & t <= s[j,2]
    k0 <- k[length(k)]
    c <- if(s[nrow(s),3]==1) set1[1] else set1[2]
    lines(t[w], k, col=mg14::colTrans(c), type='l')
    p <- if(s[j,3]==1) 19 else 1
    d <<- rbind(d, data.frame(t=t[w][length(k)], s=k[length(k)], pch=p, co
    l=c))
  }
  kmi(km, allSurv[samples==i,], looAllWeighted$linear.predictor[samples==i, l0)
}
points(d$t, d$s, pch=d$pch, col=as.character(d$col))
legend("bottomright", pch=c(1,19), col=c(set1[2], set1[1]), legend=c("C
  ontrol", "Progressor (pre-AML)", "Progressor (AML)", bty='n')

```

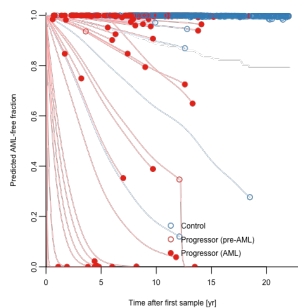

#### Calibration

```
p10 <- km[t==10]^exp(logAllWeighted$linear.predictor)
c <- cut(p10, c(0,0.4,0.95,0.99,1))
table(c)
```

```
## c
## (0,0.4] (0.4,0.95] (0.95,0.99] (0.99,1]
##      11      16      12      908
```

```
s <- summary(survfit(allSurv~c, weights=weights), times=10)
m <- sapply(split(p10,c), mean)
plot(m, s$surv, xlab="AML-free (predicted)", ylab="AML-free (observed)", xlim=c(0,1), ylim=c(0,1))
segments(m,s$lower,m,s$upper)
abline(0,1)
```

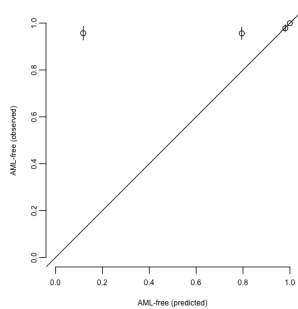

#### Hazard

```
boxplot(exp(fitBoot$linear.predictors) ~ factor(1-control[b42], labels=c("Control", "AML")), log='y', ylab="Hazard ratio", pch=19, staplewex=0, lty=1, boxwex=0.5)
```

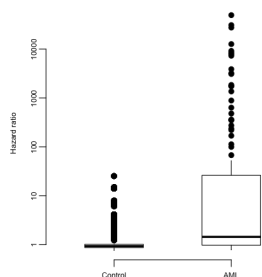

### 7.4.10 Some simulations

```
bX <- sapply(1:50, function(foo){
  set.seed(foo)
  X <- rbind(apply(allX[control,], 2, sample, n_total-sum(!control), rep
lace=TRUE), apply(allX[!control,], 2, sample) )
  lambda0 <- 5e-4
  r <- X$%coef(fitBoot)
  t <- rexp(n_total, lambda0 * exp(r))
  tmax <- 13 + runif(n_total, 0,1)
  s <- Surv(pmin(t,tmax), t < tmax)
  cases <- which(s[,2]==1)
  controls1 <- sample(which(s[,2]==0), size=1*length(cases))
  controls4 <- sample(which(s[,2]==0), size=sum(control))
  cbind(controls_inc=colMeans(X[controls4,allGroups=="Genes"]>0), AML_in
c=colMeans(X[cases,allGroups=="Genes"]>0), controls_vaf=apply(X[controls4,allGroup
s=="Genes"], 2, function(x) mean(x[x>0])), AML_vaf=apply(X[cases,allGroups=="Genes"
], 2, function(x) mean(x[x>0])))
}, simplify='array')
```

Expected vs observed driver frequency

```
png("./figures/driver.freq.simulation.png", width = 15, height = 14, units = "cm",
res = 500)
par(mar = c(5, 4, 1.5, 0.5) + 0.1, mgp=c(2,0.4,0), las=1, tcl=-0.2)
plot(-rowMeans(bX[, 'controls_inc',]), type='h', ylim=c(-.5,1)/2.5, lwd=8, xaxt='n'
, yaxt = 'n', ylab="Control - Driver frequency (%) - Pre-AML", xlab="", col=se
t1[2])
atx <- axTicks(2)
axis(2,at=atx,labels= c(20, 10, 0, 10, 20, 30, 40))
points(x=1:22+.5,-colMeans(allX[control,allGroups=="Genes"]>0), type='h', lwd=8, c
ol=set1[1])
points(rowMeans(bX[, "AML_inc",]), type='h', lwd=8, col=set1[2])
points(x=1:22+.5,colMeans(allX[!control,allGroups=="Genes"]>0), type='h', lwd=8, c
ol=set1[1])
mtext(side=1, at=1:22,sub("_."+",",colnames(allX)[allGroups=="Genes"]), las=2, fon
t=3, line=0.7)
legend("topright", fill=set1[2:1], c("Expected","Observed"), cex = 0.8)
abline(h=0)
dev.off()
```

```
## pdf
## 2
```

Expected vs observed driver VAF

```
avgVaf <- function(x) mean(x[x>0])

png("./figures/driver.vaf.simulation.png", width = 15, height = 14, units = "cm",
res = 500)
par(mar = c(5, 4, 1.5, 0.5) + 0.1, mgp=c(2,0.4,0), las=1, tcl=-0.2)
plot(-apply(bX[, 'controls_vaf',],1,avgVaf)*10, type='h', ylim=c(-40,50), lwd=8, xa
xt='n', yaxt = 'n', ylab="Control - Driver VAF (%) - Pre-AML", xlab="", col=se
t1[2])
atx <- axTicks(2)
axis(2,at=atx,labels= c(40, 20,0, 20, 40))
points(x=1:22+.5,-apply(allX[control,allGroups=="Genes"],2,avgVaf)*10, type='h', 1
wd=8, col=set1[1])
points(apply(bX[, "AML_vaf",],1,avgVaf)*10, type='h', lwd=8, col=set1[2])
points(x=1:22+.5,apply(allX[!control,allGroups=="Genes"],2,avgVaf)*10, type='h', 1
wd=8, col=set1[1])
mtext(side=1, at=1:22,sub("_."+",",colnames(allX)[allGroups=="Genes"]), las=2, fon
t=3, line = 0.6)
legend("bottomleft", fill=set1[2:1], c("Expected","Observed"), cex = 0.8)
abline(h=0)
dev.off()
```

```
## pdf
## 2
```

## 7.4.11 Simple models

```
samples <- factor(c(as.character(sangerData$Individual), as.character(torontoData$
Sample)))
```

max vaf:

```
v <- apply(allX[,allGroups=="Genes"], 1, max)*10
```

cumulative vaf

```
c <- apply(allX[,allGroups=="Genes"], 1, sum)*10
```

number of mutations

```
m <- rowSums(allX[,allGroups=="Genes"]>0)
```

any mutation

```
a <- as.integer(m>0)
```

### 7.4.11.1 Presence of any mutation

```
d <- data.frame(a)
summary(f <- coxph(allSurv ~ ., data=d ))
```

```
## Call:
## coxph(formula = allSurv ~ ., data = d)
##
## n= 950, number of events= 120
##
##      coef exp(coef) se(coef)      z Pr(>|z|)
## a 1.5144  4.5468  0.2046  7.402 1.35e-13 ***
## ---
## Signif. codes:  0 '***' 0.001 '**' 0.01 '*' 0.05 '.' 0.1 ' ' 1
##
##      exp(coef) exp(-coef) lower .95 upper .95
## a  4.547      0.2199      3.045      6.79
##
## Concordance= 0.672 (se = 0.023 )
## Rsquare= 0.064 (max possible= 0.801 )
## Likelihood ratio test= 63.31 on 1 df,  p=1.776e-15
## Wald test = 54.78 on 1 df,  p=1.347e-13
## Score (logrank) test = 66.02 on 1 df,  p=4.441e-16
```



```

los <- do.call("rbind",mclapply(levels(samples), function(l){
  i <- samples!=l
  f <- coxph(allSurv ~ ., data=d, subset=i)
  p <- as.matrix(d[i,i]) %*% f$coefficients
  r <- cbind(matrix(f$coefficients, nrow=length(p), ncol=length(f$coefficients), b
yrow=TRUE), linear.predictor=p)
  colnames(r) <- c(names(f$coefficients), "linear.predictor")
  as.data.frame(r)
}, mc.cores=4))
psAnyMt <- los[order(order(samples)),]

survConcordance(allSurv ~ psAnyMt$linear.predictor)

```

```

## Call:
## survConcordance(formula = allSurv ~ psAnyMt$linear.predictor)
##
## n= 950
## Concordance= 0.5431925 se= 0.02388586
## concordant discordant tied.risk tied.time std(c-d)
## 34829.000 28205.000 13646.000 1.000 3663.136

```

#### Dynamic/cumulative AUC

```

w <- c(which(allSurv[,1]==0)[-1]-1, nrow(allSurv))
survAll2 <- Surv(allSurv[w,2], allSurv[w,3])
t <- seq(0,22,0.1)
allX2 <- allX[w, ]

auc.uno <- AUC.uno(survAll2, survAll2, psAnyMt$linear.predictor[w], times=t)

plot(auc.uno$times, auc.uno$auc, xlab="Time (years)", ylab="AUC", pch=16, col="grey80", ylim = c(0,1.0))
lines(auc.uno$times, predict(loess(auc.uno$auc ~ auc.uno$times, span=0.25)))
abline(h=auc.uno$iauc, lty = 3, lwd = 1)
legend("bottomright", bty = "n", cex = 1.2, legend = paste("AUC = ",round(auc.uno$iauc,2)))

```

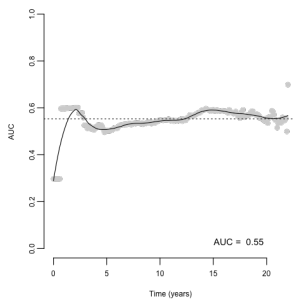

```
AnyMt.a <- auc.uno
```

#### Presence of any mutation + vaf

```

d <- data.frame(a,v)
summary(f <- coxph(allSurv ~ ., data=d ))

```

```

## Call:
## coxph(formula = allSurv ~ ., data = d)
##
## n= 950, number of events= 120
##
##      coef exp(coef) se(coef)      z Pr(>|z|)
## a 1.025548  2.788622 0.223677  4.585 4.54e-06 ***
## v 0.050613  1.051915 0.005605  9.030 < 2e-16 ***
## ---
## Signif. codes:  0 '***' 0.001 '**' 0.01 '*' 0.05 '.' 0.1 ' ' 1
##
##      exp(coef) exp(-coef) lower .95 upper .95
## a      2.789      0.3586      1.799      4.323
## v      1.052      0.9506      1.040      1.064
##
## Concordance= 0.737 (se = 0.024 )
## Rsquare= 0.119 (max possible= 0.801 )
## Likelihood ratio test= 120.5 on 2 df,  p=0
## Wald test = 161.8 on 2 df,  p=0
## Score (logrank) test = 263.9 on 2 df,  p=0

```

```

los <- do.call("rbind",mclapply(levels(samples), function(l){
  i <- samples!=l
  f <- coxph(allSurv ~ ., data=d, subset=i)
  p <- as.matrix(d[!i,]) %*% f$coefficients
  r <- cbind(matrix(f$coefficients, nrow=length(p), ncol=length(f$coefficients), b
yrow=TRUE), linear.predictor=p)
  colnames(r) <- c(names(f$coefficients), "linear.predictor")
  as.data.frame(r)
}, mc.cores=4))
psAnyMtVaf <- los[order(order(samples)),]

survConcordance(allSurv ~ psAnyMtVaf$linear.predictor)

```

```

## Call:
## survConcordance(formula = allSurv ~ psAnyMtVaf$linear.predictor)
##
## n= 950
## Concordance= 0.7287559 se= 0.0238873
## concordant discordant tied.risk tied.time std(c-d)
## 49091.000 14009.000 13580.000 1.000 3663.356

```

Dynamic/cumulative AUC

```

auc.uno <- AUC.uno(survAll2, survAll2, psAnyMtVaf$linear.predictor[w], times=t)

plot(auc.uno$times, auc.uno$auc, xlab="Time (years)", ylab="AUC", pch=16, col="grey80", ylim = c(0,1.0))
lines(auc.uno$times, predict(loess(auc.uno$auc ~ auc.uno$times, span=0.25)))
abline(h=auc.uno$iauc, lty = 3, lwd = 1)
legend("bottomright", bty = "n", cex = 1.2, legend = paste("AUC = ",round(auc.uno$iauc,2)))

```

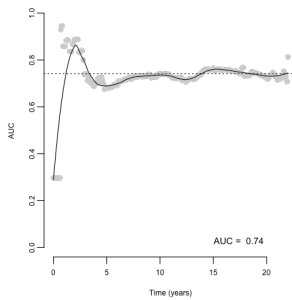

```
AnyMtVaf.a <- auc.uno
```

#### 7.4.11.2 Number of mutations + vaf

```

d <- data.frame(m,v)
summary(f <- coxph(allSurv ~ ., data=d ))

```

```

## Call:
## coxph(formula = allSurv ~ ., data = d)
##
## n= 950, number of events= 120
##
##      coef exp(coef) se(coef)      z Pr(>|z|)
## m 0.653487 1.922231 0.088287 7.402 1.34e-13 ***
## v 0.040976 1.041827 0.006562 6.245 4.25e-10 ***
## ---
## Signif. codes:  0 '***' 0.001 '**' 0.01 '*' 0.05 '.' 0.1 ' ' 1
##
##      exp(coef) exp(-coef) lower .95 upper .95
## m      1.922      0.5202      1.617      2.285
## v      1.042      0.9599      1.029      1.055
##
## Concordance= 0.744 (se = 0.024 )
## Rsquare= 0.142 (max possible= 0.801 )
## Likelihood ratio test= 145.3 on 2 df,  p=0
## Wald test               = 213.3 on 2 df,  p=0
## Score (logrank) test = 302.9 on 2 df,  p=0

```

```

los <- do.call("rbind",mclapply(levels(samples), function(l){
  i <- samples!=l
  f <- coxph(allSurv ~ ., data=d, subset=i)
  p <- as.matrix(d[!i,]) %*% f$coefficients
  r <- cbind(matrix(f$coefficients, nrow=length(p), ncol=length(f$coefficients), b
yrow=TRUE), linear.predictor=p)
  colnames(r) <- c(names(f$coefficients), "linear.predictor")
  as.data.frame(r)
}, mc.cores=4))
psNMtVaf <- los[order(order(samples)),]

survConcordance(allSurv ~ psNMtVaf$linear.predictor)

```

```

## Call:
## survConcordance(formula = allSurv ~ psNMtVaf$linear.predictor)
##
## n= 950
## Concordance= 0.7431403 se= 0.0238873
## concordant discordant tied.risk tied.time std(c-d)
## 50194.000 12906.000 13580.000 1.000 3663.356

```

Dynamic/cumulative AUC

```
auc.uno <- AUC.uno(survAll2, survAll2, psNmtVaf$linear.predictor[w], times=t)

plot(auc.uno$times, auc.uno$auc, xlab="Time (years)", ylab="AUC", pch=16, col="grey80", ylim = c(0,1.0))
lines(auc.uno$times, predict(loess(auc.uno$auc ~ auc.uno$times, span=0.25)))
abline(h=auc.uno$iauc, lty = 3, lwd = 1)
legend("bottomright", bty = "n", cex = 1.2, legend = paste("AUC = ",round(auc.uno$iauc,2)))
```

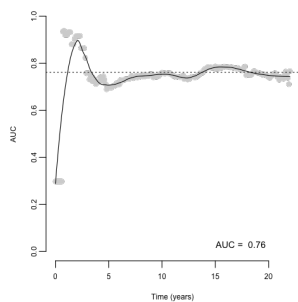

```
NMtVaf.a <- auc.uno
```

### 7.4.11.3 Number of mutations + cumulative vaf

```
d <- data.frame(m,c)
summary(f <- coxph(allSurv ~ ., data=d))
```

```
## Call:
## coxph(formula = allSurv ~ ., data = d)
##
## n = 950, number of events = 120
##
##      coef exp(coef) se(coef)      z Pr(>|z|)
## m 0.613264  1.846449 0.090393  6.784 1.17e-11 ***
## c 0.033648  1.034220 0.005036  6.681 2.38e-11 ***
## ---
## Signif. codes:  0 '***' 0.001 '**' 0.01 '*' 0.05 '.' 0.1 ' ' 1
##
## exp(coef) exp(-coef) lower .95 upper .95
## m  1.846    0.5416    1.547    2.204
## c  1.034    0.9669    1.024    1.044
##
## Concordance = 0.744 (se = 0.024)
## Rsquare = 0.144 (max possible = 0.801)
## Likelihood ratio test = 148.2 on 2 df,  p=0
## Wald test = 223.3 on 2 df,  p=0
## Score (logrank) test = 350.7 on 2 df,  p=0
```

```
los <- do.call("rbind",mclapply(levels(samples), function(l){
  i <- samples[l]
  f <- coxph(allSurv ~ ., data=d, subset=i)
  p <- as.matrix(d[!i,]) %>% f$coefficients
  r <- cbind(matrix(f$coefficients, nrow=length(p), ncol=length(f$coefficients), b
yrow=TRUE), linear.predictor=p)
  colnames(r) <- c(names(f$coefficients), "linear.predictor")
  as.data.frame(r)
}, mc.cores=4))
psNmtCumVaf <- los[order(order(samples)),]

survConcordance(allSurv ~ psNmtCumVaf$linear.predictor)
```

```
## Call:
## survConcordance(formula = allSurv ~ psNmtCumVaf$linear.predictor)
##
## n = 950
## Concordance = 0.743362 se = 0.0238873
## concordant discordant tied.risk tied.time std(c-d)
## 50211.000 12889.000 13580.000 1.000 3663.356
```

Dynamic/cumulative AUC

```
auc.uno <- AUC.uno(survAll2, survAll2, psNmtCumVaf$linear.predictor[w], times=t)

plot(auc.uno$times, auc.uno$auc, xlab="Time (years)", ylab="AUC", pch=16, col="grey80", ylim = c(0,1.0))
lines(auc.uno$times, predict(loess(auc.uno$auc ~ auc.uno$times, span=0.25)))
abline(h=auc.uno$iauc, lty = 3, lwd = 1)
legend("bottomright", bty = "n", cex = 1.2, legend = paste("AUC = ",round(auc.uno$iauc,2)))
```

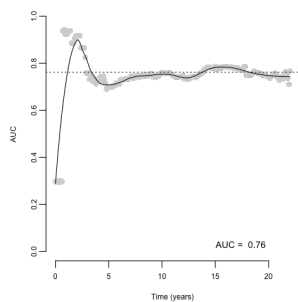

```
NmtCumVaf.a <- auc.uno
```

#### Gene-level risks

```
d <- allX
summary(f <- coxph(allSurv ~ ., data=d))
```

```
## Call:
## coxph(formula = allSurv ~ ., data = d)
##
## n = 950, number of events = 120
##
##          coef exp(coef) se(coef)      z Pr(>|z|)
## ASXL1_0.1  0.45410  1.57475  0.25483  1.782  0.0748
## BCOR_0.1   4.53517  93.23942  15.29850  0.296  0.7669
## CBL_0.1    0.02418  1.02448  0.74288  0.033  0.9740
## DNMT3A_0.1 0.13468  1.14417  0.18286  0.737  0.4614
## IDH1_0.1   0.39412  1.48307  0.63231  0.623  0.5331
## IDH2_0.1   0.51163  1.66800  0.29079  1.759  0.0785
## JAK2_0.1   0.59064  1.80514  0.39331  1.502  0.1332
## KDM6A_0.1  0.15988  1.17337  32.12704  0.005  0.9960
## KMT2C_0.1 -0.50258  0.60497  1.77003 -0.284  0.7765
## KMT2D_0.1 -0.01333  0.98676  0.58364 -0.023  0.9818
## KRAS_0.1   0.54336  1.72178  12.36468  0.044  0.9649
## NF1_0.1    -0.76668  0.46455  5.94275 -0.129  0.8973
## NRAS_0.1   7.40428  1643.00852  6.01855  1.230  0.2186
## PHF6_0.1   4.31340  74.69375  15.42773  0.280  0.7798
## PTPN11_0.1 4.49429  89.50474  6.18432  0.727  0.4674
## RAD21_0.1  0.07319  1.07594  6.89358  0.011  0.9915
## RUNX1_0.1  0.17980  1.19698  0.24611  0.731  0.4650
## SF3B1_0.1  1.10331  3.01414  0.52063  2.119  0.0341 *
## SRSF2_0.1  0.34535  1.41248  0.21771  1.586  0.1127
## TET2_0.1   0.17179  1.18743  0.20206  0.850  0.3952
## TP53_0.1   2.17381  8.79176  0.55321  3.929  8.51e-05 ***
## U2AF1_0.1  2.74012  15.48884  0.35246  7.774  7.55e-15 ***
## age_10    -0.01189  0.98818  0.10907 -0.109  0.9132
## gender    -0.01138  0.98868  0.19862 -0.057  0.9543
## cohort    -0.13561  0.87318  0.23791 -0.570  0.5687
## ---
## Signif. codes:  0 '***' 0.001 '**' 0.01 '*' 0.05 '.' 0.1 ' ' 1
##
##          exp(coef) exp(-coef) lower .95 upper .95
## ASXL1_0.1  1.5747  0.6350222  9.557e-01 2.595e+00
## BCOR_0.1   93.2394  0.0107251  8.861e-12 9.811e+14
## CBL_0.1    1.0245  0.9761095  2.389e-01 4.394e+00
## DNMT3A_0.1 1.1442  0.8739972  7.995e-01 1.637e+00
## IDH1_0.1   1.4831  0.6742750  4.295e-01 5.121e+00
## IDH2_0.1   1.6680  0.5995195  9.434e-01 2.949e+00
## JAK2_0.1   1.8051  0.5539734  8.351e-01 3.902e+00
## KDM6A_0.1  1.1734  0.8522477  5.283e-28 2.606e+27
## KMT2C_0.1  0.6050  1.6529815  1.884e-02 1.943e+01
## KMT2D_0.1  0.9868  1.0134221  3.144e-01 3.097e+00
## KRAS_0.1   1.7218  0.5807959  5.142e-11 5.765e+10
## NF1_0.1    0.4646  2.1526020  4.060e-06 5.315e+04
## NRAS_0.1   1643.0085  0.0006086  1.238e-02 2.181e+08
## PHF6_0.1   74.6937  0.0133880  5.510e-12 1.012e+15
## PTPN11_0.1 89.5047  0.0111726  4.872e-04 1.644e+07
## RAD21_0.1  1.0759  0.9294227  1.459e-06 7.936e+05
## RUNX1_0.1  1.1970  0.8354364  7.389e-01 1.939e+00
## SF3B1_0.1  3.0141  0.3317696  1.086e+00 8.362e+00
## SRSF2_0.1  1.4125  0.7079756  9.219e-01 2.164e+00
## TET2_0.1   1.1874  0.8421566  7.991e-01 1.764e+00
## TP53_0.1   8.7918  0.1137429  2.973e+00 2.600e+01
## U2AF1_0.1  15.4888  0.0645626  7.763e+00 3.091e+01
## age_10     0.9882  1.0119578  7.980e-01 1.224e+00
## gender     0.9887  1.0114489  6.699e-01 1.459e+00
## cohort     0.8732  1.1452345  5.478e-01 1.392e+00
##
## Concordance = 0.81 (se = 0.027)
## Rsquare = 0.069 (max possible = 0.801)
## Likelihood ratio test = 67.53 on 25 df, p=8.884e-06
## Wald test = 110.8 on 25 df, p=9.049e-13
## Score (logrank) test = 782.6 on 25 df, p=0
```

```

los <- do.call("rbind",mclapply(levels(samples), function(l){
  i <- samples!=l
  f <- coxph(allSurv ~ ., data=d, subset=i)
  p <- as.matrix(d[,i,]) %*% f$coefficients
  r <- cbind(matrix(f$coefficients, nrow=length(p), ncol=length(f$coefficients), b
yrow=TRUE), linear.predictor=p)
  colnames(r) <- c(names(f$coefficients), "linear.predictor")
  as.data.frame(r)
}, mc.cores=4))
psGenes <- los[order(order(samples)),]

survConcordance(allSurv ~ psGenes$linear.predictor)

```

```

## Call:
## survConcordance(formula = allSurv ~ psGenes$linear.predictor)
##
## n= 950
## Concordance= 0.7799296 se= 0.02746328
## concordant discordant tied.risk tied.time std(c-d)
## 59805.000 16875.000 0.000 1.000 4211.768

```

#### Dynamic/cumulative AUC

```

auc.uno <- AUC.uno(survAll2, survAll2, psGenes$linear.predictor[w], times=t)

plot(auc.uno$times, auc.uno$auc, xlab="Time (years)", ylab="AUC", pch=16, col="grey80", ylim = c(0,1.0))
lines(auc.uno$times, predict(loess(auc.uno$auc ~ auc.uno$times, span=0.25)))
abline(h=auc.uno$iauc, lty = 3, lwd = 1)
legend("bottomright", bty = "n", cex = 1.2, legend = paste("AUC = ",round(auc.uno$iauc,2)))

```

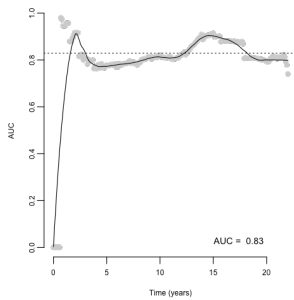

```

Genes.a <- auc.uno

# Concordance summary
c <- rbind(
  `(1) Any mutations`=as.data.frame(survConcordance(allSurv ~ psAnyMt$linear.predictor)[c("concordance", "std.err")]),
  `(2) Any mt + VAF`=as.data.frame(survConcordance(allSurv ~ psAnyMtVaf$linear.predictor)[c("concordance", "std.err")]),
  `(3) No. mt + cumulative VAF`=as.data.frame(survConcordance(allSurv ~ psNMtCumVaf$linear.predictor)[c("concordance", "std.err")]),
  `(4) Gene model`=as.data.frame(survConcordance(allSurv ~ psGenes$linear.predictor)[c("concordance", "std.err")])
)
c

```

|                             | concordance<br><dbl> | std.err<br><dbl> |
|-----------------------------|----------------------|------------------|
| (1) Any mutations           | 0.5431925            | 0.02388586       |
| (2) Any mt + VAF            | 0.7287559            | 0.02388730       |
| (3) No. mt + cumulative VAF | 0.7433620            | 0.02388730       |
| (4) Gene model              | 0.7799296            | 0.02746328       |

4 rows

```

set1 <- RColorBrewer::brewer.pal(6, "Set1")

par(mar = c(9, 4, 1.5, 0.5) + 0.1, mgp=c(2.7,0.4,0), las=1, tcl=-0.2)
b <- barplot(c$concordance-0.5, ylab="Concordance", col=set1, ylim=c(0.5,0.88), of
fset=0.5)
mg14::rotatedLabel(x=b, labels=rownames(c))
segments(b,c$concordance+c$std.err,b,c$concordance-c$std.err)

```

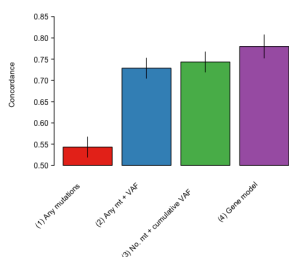

#### Dynamic/cumulative AUC summary

```
d.auc <- data.frame(iauc = c(AnyMt.a$iauc, AnyMtVaf.a$iauc, NmtCumVaf.a$iauc, 0.79
))
rownames(d.auc) <- c("(1) Any mutations", "(2) Any mt + VAF", "(3) No. mt + cumulative
VAF", "(4) Gene model")
```

d.auc

|                             | iauc<br><dbl> |
|-----------------------------|---------------|
| (1) Any mutations           | 0.5528776     |
| (2) Any mt + VAF            | 0.7420613     |
| (3) No. mt + cumulative VAF | 0.7618961     |
| (4) Gene model              | 0.7900000     |

4 rows

```
par(mar = c(9, 4, 1.5, 0.5) + 0.1, mgp=c(2.7,0.4,0), las=1, tcl=-0.2)
b <- barplot(d.auc$iauc-0.5, ylab="Dynamic AUC", col=set1, ylim=c(0.5,0.80), offse
t=0.5)
mg14::rotatedLabel(x=b, labels=rownames(d.auc))
```

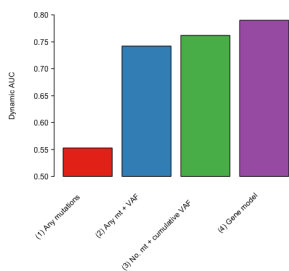

#### AML-free survival by number of drivers

```
nonc <- rowSums(allX[,allGroups=="Genes"]>0)
nonc <- cut(nonc, c(-1,0,1,2,max(nonc)))
plot(survfit(allSurv-nonc), col=set1, xlab="Time after first sample [yr]", ylab="A
ML-free fraction", bty='L', yaxs='i', ylim=c(0,1.01))
legend("bottomleft", c(0,1,2,"3+"), col=set1, lty=1, bty='n', title="no. drivers")
```

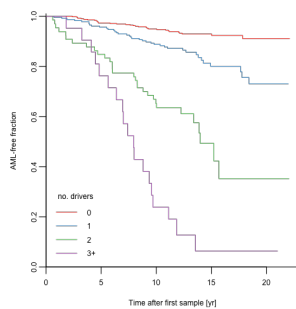

#### AML-free survival by max VAF

```
mvaf <- apply(allX[,allGroups=="Genes"], 1, max)*10
mvaf <- cut(mvaf, c(-1,0,4,8,max(mvaf)))
plot(survfit(allSurv-mvaf), col=set1, xlab="Time after first sample [yr]", ylab="A
ML-free fraction", bty='L', yaxs='i', ylim=c(0,1.01))
levels(mvaf)[1] <- "None"
legend("bottomleft", levels(mvaf), col=set1, lty=1, bty='n', title="Max. VAF%")
```

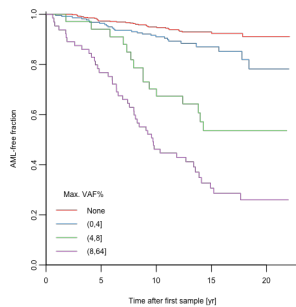

## 8 Logistic regression

```
library(glmnet)
library(ROCR)
```

```
## Loading required package: gplots
```

```
##
## Attaching package: 'gplots'
```

```
## The following object is masked from 'package:stats':
##
## lowess
```

## 8.1 Combined

```
set.seed(42)
y <- allSurv[,3]
x <- allX
x <- as.matrix(cbind(x, mu.Genes=rowSums(x[,allGroups=="Genes"])))
fitLogRidge <- cv.glmnet(x, y, alpha=0, standardize=FALSE, penalty.factor=c(allGro
ups=="Genes",FALSE), family="binomial", lambda=10^seq(-5,5,0.1)/nrow(x))
fitLog <- glm(y ~ x[,ncol(x)], family="binomial")
coefLogRidge <- coef(fitLogRidge, s=fitLogRidge$lambda.min)[-1,1]
w <- names(coefLogRidge) %in% colnames(allX)[allGroups=="Genes"]
coefLogRidge[w] <- coefLogRidge[w] + coefLogRidge["mu.Genes"]
names(coefLogRidge) <- colnames(x)
s <- summary(survfit(allSurv ~1))

plot(predict(fitLogRidge, newx=x, s=fitLogRidge$lambda.min),fitAll$linear.predicto
rs)
```

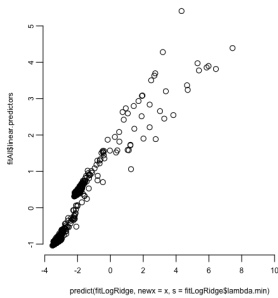

```
cor(predict(fitLogRidge, newx=x, s=fitLogRidge$lambda.min),fitAll$linear.predictor
s)
```

```
##           [,1]
## 1 0.9325608
```

## 8.2 Discovery cohort

```
set.seed(42)
x <- cbind(as.matrix(torontoX), mu.Genes=rowSums(torontoX[torontoGroups=="Genes"]
))
fitLogRidgeToronto <- cv.glmnet(x, torontoSurv[,2], alpha=0, standardize=FALSE, pe
nalty.factor=c(torontoGroups=="Genes",FALSE), family="binomial", lambda=10^seq(-5
,5,0.1)/nrow(x))
l <- max(which(abs(fitLogRidgeToronto$cvm - min(fitLogRidgeToronto$cv)) < 0.01))
coefFitLogRidgeToronto <- coef(fitLogRidgeToronto, s=fitLogRidge$lambda.min *nrow(
allX)/nrow(torontoX))[-1,1]
w <- names(coefFitLogRidgeToronto) %in% colnames(torontoX)[torontoGroups=="Genes"]
coefFitLogRidgeToronto[w] <- coefFitLogRidgeToronto[w] + coefFitLogRidgeToronto["m
u.Genes"]
```

## 8.3 Validation cohort

```
set.seed(42)
x <- cbind(as.matrix(sangerX), mu.Genes=rowSums(sangerX[sangerGroups=="Genes"]
))
y <- sangerSurv[,3]
fitLogRidgeSanger <- glmnet(x, y, alpha=0, standardize=FALSE, penalty.factor=c(san
gerGroups%in%c("Genes","Blood"),1e-2), family="binomial", lambda=10^seq(-5,5,0.1)/
nrow(x))
coefFitLogRidgeSanger <- coef(fitLogRidgeSanger, s=fitLogRidge$lambda.min*nrow(all
X)/nrow(sangerX)/4)[-1,1]
w <- names(coefFitLogRidgeSanger) %in% colnames(sangerX)[sangerGroups=="Genes"]
coefFitLogRidgeSanger[w] <- coefFitLogRidgeSanger[w] + coefFitLogRidgeSanger["mu.G
enes"]
coefFitLogRidgeSanger
```

```
## ASXL1_0.1 CBL_0.1 DNMT3A_0.1 JAK2_0.1 KMT2C_0.1 KMT2D_0.1 KRAS
_0.1 NF1_0.1 NRAS_0.1 RAD21_0.1
## 1.61735484 0.62402794 0.60690505 1.21223108 1.28664688 0.38990853 1.3057
9768 1.05008349 1.12131863 1.08384807
## SF3B1_0.1 SRSF2_0.1 TET2_0.1 TP53_0.1 U2AF1_0.1 age_10 ge
nder systol_100 diastol_100 bmi_10
## 0.95795153 0.76775960 0.87432787 2.09849607 2.46513749 0.15915519 -0.1710
4884 -0.26674155 0.40623412 0.78151214
## cholestl_10 triglyc hdl ldl lym mcv_100 rd
w_10 wbc_10 plt_100 hgb_10
## 0.02221735 -0.02231645 -0.60655423 0.08051073 0.02388812 -0.48424380 1.4392
5261 -0.13343432 0.28531137 0.80105113
## mu.Genes
## 1.16143798
```

## 8.4 Bootstrap CIs

```

coefLogRidgeBoot <- sapply(1:100, function(foo){
  set.seed(foo)
  y <- allSurv[,3]
  x <- allX
  x <- as.matrix(cbind(x, mu.Genes=rowSums(x[,allGroups=="Genes"])))
  b <- sample(1:nrow(x), replace=TRUE)
  fitLogRidgeBoot <- glmnet(x[b,], y[b], alpha=0, standardize=FALSE, pen
alty.factor=c(allGroups=="Genes",FALSE, FALSE), family="binomial", lambda=10^seq(-
5,5,0.1)/nrow(x))
  coefLogRidgeBoot <- coef(fitLogRidgeBoot, s=fitLogRidgeBoot$lambda.min)[-1
,1]
  w <- names(coefLogRidgeBoot) %in% colnames(allX)[allGroups=="Genes"]
  coefLogRidgeBoot[w] <- coefLogRidgeBoot[w] + coefLogRidgeBoot["mu.Gene
s"]
  names(coefLogRidgeBoot) <- colnames(x)
  coefLogRidgeBoot
})

```

## 8.5 Forest plot

```

par(bty="n", mar=c(3,6,3,10)+.5, mgp=c(2,0.5,0), xpd=FALSE)
c <- exp(coefLogRidge[-25])
o <- c(23:24,1:22,25)
ci <- apply(coefLogRidgeBoot,1,quantile, c(0.025,0.975))[,,-25]
y <- rev(seq_along(c))
plot(c[o], y, xlab="relative risk", log='x', ylab='', yaxt="n", pch=NA, xlim=c(0.5
,10))
abline(h=y, col="#EEEEEE", lty=1)
abline(v=1, lty=1, col="grey")
abline(v=c("mu.Genes"), col=mg14::colTrans(set1[3]), lty=1)
segments(exp(ci[1,o]), y, exp(ci[2,o]),y)
points(c[o], y, xlab="relative risk", bg=set1[3], cex=2, pch=c(rep(21,24), 23))
m <- match(names(c)[o],names(coefFitLogRidgeToronto))
points(exp(coefFitLogRidgeToronto[m]), y,bg=set1[4], pch=c(rep(21,24), 23), cex=1)
m <- match(names(c)[o],names(coefFitLogRidgeSanger))
points(exp(coefFitLogRidgeSanger[m]), y,bg=set1[5], pch=c(rep(21,24), 23), cex=1)
mtext(side=2, sub("mu.Genes", "avg. genes",sub("_."+,"",names(c)[o])), at=y, las=2,
font=c(1,1,rep(3,22),1))

r <- sapply(split(as.data.frame(allX>0), control), colMeans)
f <- sapply(split(allX, control), apply, 2, function(x) mean(x[x>0]))
par(xpd=NA)
points(rep(18,22),y[3:24], cex=sqrt(r[o[3:24],2]*10), pch=21, bg=set1[2])
points(rep(18*1.2,22), y[3:24], cex=sqrt(r[o[3:24],1]*10), pch=21, bg=set1[1])
points(rep(36,22),y[3:24], cex=sqrt(f[o[3:24],2]), pch=21, bg=set1[2])
points(rep(36*1.2,22), y[3:24], cex=sqrt(f[o[3:24],1]), pch=21, bg=set1[1])
legend(x=0.5, y=28, pch=21, pt.bg=set1[c(4,5,3)], c("DC","VC","combined"), bty="n"
, ncol=3, text.width=0.1)

text(y=24, x=18, "recurrence")
text(y=24, x=38, "VAF")

axis(1, at=c(18,18*1.2), c("control","AML"), las=2, line=-1)
axis(1, at=c(36,36*1.2), c("control","AML"), las=2, line=-1)

```



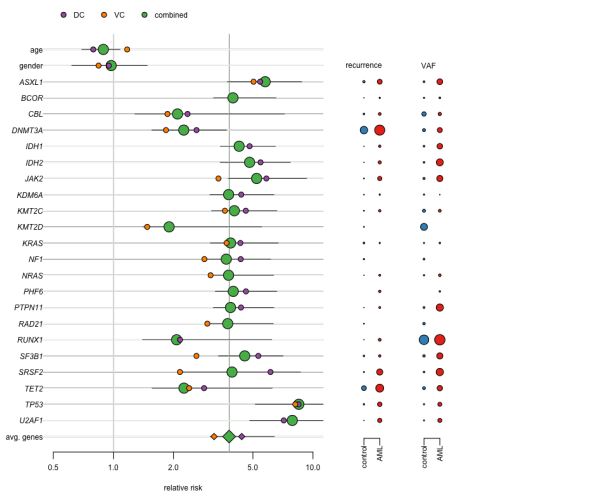

## 8.6 AUC

```
aucLogRidgeBoot <- t(sapply(1:100, function(foo){
  set.seed(foo)
  y <- allSurv[,3]
  x <- allX
  x <- as.matrix(cbind(x, mu.Genes=rowSums(x[,allGroups=="Genes"
])))
  b <- sample(1:nrow(x), replace=TRUE)
  oob <- setdiff(1:nrow(x),b)
  c(inb=performance(prediction(x[b,] %*% coefLogRidgeBoot[,foo],
y[b]),"auc")@y.values[[1]],
  oob=performance(prediction(x[oob,] %*% coefLogRidgeBoo
t[,foo], y[oob]),"auc")@y.values[[1]]
}))
apply(aucLogRidgeBoot, 2, quantile)
```

```
##           inb           oob
## 0%      0.7600825 0.7331746
## 25%     0.7981192 0.7814137
## 50%     0.8107881 0.8058353
## 75%     0.8228798 0.8254089
## 100%    0.8616209 0.8650056
```

```
performance(prediction(as.matrix(torontoX) %*% coefFitLogRidgeToronto[-22], toront
oSurv[,2]),"auc")@y.values[[1]]
```

```
## [1] 0.7649573
```

```
performance(prediction(as.matrix(sangerImp) %*% coefFitLogRidgeToronto[-22], sange
rSurv[,3]),"auc")@y.values[[1]]
```

```
## [1] 0.806366
```

```
performance(prediction(as.matrix(sangerX) %*% coefFitLogRidgeSanger[-31], sangerSu
rv[,3]),"auc")@y.values[[1]]
```

```
## [1] 0.8479775
```

```
performance(prediction(ImputeMissing(sangerX, as.matrix(torontoImp)) %*% coefFitLo
gRidgeSanger[-31], torontoSurv[,2]),"auc")@y.values[[1]]
```

```
## [1] 0.6885916
```

## 9 Tabulate results

```

# library(xlsx)
# wb <- createWorkbook("xlsx")
# sheet <- createSheet(wb, sheetName="Cox PH adjusted (combined)")
# addDataFrame(waldWeighted,
#   sheet,
#   colnamesStyle = CellStyle(wb) + Font(wb, isBold=TRUE) + Border(),
#   rownamesStyle = CellStyle(wb) + Font(wb, isBold=TRUE)
# )
# sheet <- createSheet(wb, sheetName="Cox PH adjusted (DC)")
# addDataFrame(waldWeightedToronto,
#   sheet,
#   colnamesStyle = CellStyle(wb) + Font(wb, isBold=TRUE) + Border(),
#   rownamesStyle = CellStyle(wb) + Font(wb, isBold=TRUE)
# )
# sheet <- createSheet(wb, sheetName="Cox PH adjusted (VC)")
# addDataFrame(waldWeightedSanger,
#   sheet,
#   colnamesStyle = CellStyle(wb) + Font(wb, isBold=TRUE) + Border(),
#   rownamesStyle = CellStyle(wb) + Font(wb, isBold=TRUE)
# )
# sheet <- createSheet(wb, sheetName="Logistic regression (combined)")
# addDataFrame(data.frame(`Coef combined`=coefLogRidge, CI=t(apply(coefLogRidgeBoo
t, 1, quantile, c(0.025,0.975))),
#   check.names=FALSE),
#   sheet,
#   colnamesStyle = CellStyle(wb) + Font(wb, isBold=TRUE) + Border(),
#   rownamesStyle = CellStyle(wb) + Font(wb, isBold=TRUE)
# )
# sheet <- createSheet(wb, sheetName="Logistic regression (DC)")
# addDataFrame(data.frame(`Coef combined`=coefFitLogRidgeToronto,
#   check.names=FALSE),
#   sheet,
#   colnamesStyle = CellStyle(wb) + Font(wb, isBold=TRUE) + Border(),
#   rownamesStyle = CellStyle(wb) + Font(wb, isBold=TRUE)
# )
# sheet <- createSheet(wb, sheetName="Logistic regression (Sanger)")
# addDataFrame(data.frame(`Coef combined`=coefFitLogRidgeSanger,
#   check.names=FALSE),
#   sheet,
#   colnamesStyle = CellStyle(wb) + Font(wb, isBold=TRUE) + Border(),
#   rownamesStyle = CellStyle(wb) + Font(wb, isBold=TRUE)
# )
# saveWorkbook(wb, file="SupplementaryTables.xlsx")

```

## 10 Clinical/Demographic model

Necessary to reconstruct matrices and survival objects to use data from VC for all 8 samples sequenced in both cohorts ## Discovery cohort Data 83 pre-AML (keeping duplicates with validation cohort)

```

f = "./arch_data/DC_vaf_matrix_no_duplicates_414ctrl_83aml.csv"
torontoData <- read.csv(f)

torontoData$gender <- ifelse(torontoData$Sex == "male", 1,
  ifelse(torontoData$Sex == "female", 0, torontoData$Sex))
table(torontoData$gender)

```

```

##
## 0 1
## 293 204

```

```

torontoData$gender <- as.numeric(torontoData$gender)
colnames(torontoData)

```

```

## [1] "Sample" "ASXL1" "BCOR" "CALR" "CBL" "DNMT3A"
"IDH1" "IDH2"
## [9] "JAK2" "KDM6A" "KIT" "KMT2C" "KRAS" "NF1"
"NRAS" "PHF6"
## [17] "PTPN11" "RUNX1" "SF3B1" "SRSF2" "TET2" "TP53"
"U2AF1" "Diagnosis"
## [25] "fu_years" "age" "Sex" "no_drivers" "gender"

```

Manually standardize magnitudes

```

torontoData <- torontoData[!duplicated(torontoData),]

gene_vars <- c("CALR", "NRAS", "DNMT3A", "SF3B1", "IDH1", "KIT", "TET2", "RAD21",
"JAK2", "CBL", "KRAS", "PTPN11", "IDH2", "TP53", "NF1", "SRSF2", "CEBPA", "ASXL1",
"RUNX1", "U2AF1", "BCOR", "KDM6A", "PHF6", "KMT2C", "KMT2D")

torontoX <- torontoData[, colnames(torontoData) %in% c(gene_vars, "age", "gender")
]

torontoX <- as.data.frame(torontoX)

```

Only include genes in model if mutated in >2 samples

```

thr <- 2
torontoX <- torontoX[,colSums(torontoX != 0)>=thr]

torontoGroups <- factor(names(torontoX) %in% c("age", "gender")+1, level=1:2, labels=c("Genes", "Demographics"))
colnames(torontoX)

```

```

## [1] "ASXL1" "CALR" "CBL" "DNMT3A" "IDH1" "IDH2" "JAK2" "KDM6A" "K
MT2C" "KRAS" "NF1" "PHF6"
## [13] "PTPN11" "RUNX1" "SF3B1" "SRSF2" "TET2" "TP53" "U2AF1" "age" "g
ender"

```

```
torontoGroups
```

```
## [1] Genes Genes Genes Genes Genes Genes
Genes Genes
## [9] Genes Genes Genes Genes Genes Genes
Genes Genes
## [17] Genes Genes Genes Demographics Demographics
## Levels: Genes Demographics
```

Manually standardize age and mutation VAFs

```
torontoX$age <- torontoX$age/10
names(torontoX)[which(names(torontoX)== "age")] <- "age_10"
g <- torontoGroups == "Genes"
torontoX[,g] <- torontoX[,g]*10
names(torontoX)[g] <- paste(names(torontoX)[g], "0.1", sep="_")
colnames(torontoX)
```

```
## [1] "ASXL1_0.1" "CALR_0.1" "CBL_0.1" "DNMT3A_0.1" "IDH1_0.1" "IDH2_0.1"
" JAK2_0.1" "KDM6A_0.1"
## [9] "KMT2C_0.1" "KRAS_0.1" "NF1_0.1" "PHF6_0.1" "PTPN11_0.1" "RUNX1_0.1"
" SF3B1_0.1" "SRSF2_0.1"
## [17] "TET2_0.1" "TP53_0.1" "U2AF1_0.1" "age_10" "gender"
```

```
torontoSurv <- Surv(torontoData$fu_years, torontoData$Diagnosis=="AML")
plot(survfit(torontoSurv~ 1), col="black", main="DC", xlab="Time after first sa
mple (years)", ylab="AML-free fraction", bty='L', yaxs='i', ylim=c(0,1.01), mark.t
ime = T)
```

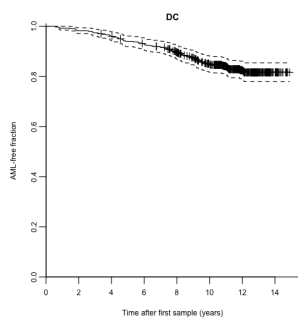

```
plot(survfit(torontoSurv ~ torontoData$Diagnosis), xlab='Time after first sample (
years)', main = "DC", ylab='AML-free fraction', bty='L', yaxs='i', ylim=c(0,1.01),
mark.time = T, col = set1[1:2])
```

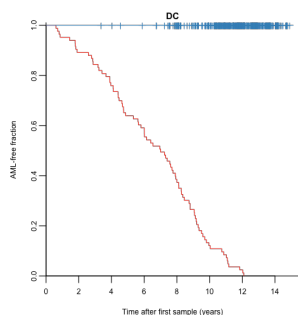

## 10.1 Validation cohort

all 37 pre-AML samples including overlap with DC

```
f = "./arch_data/VC_vaf_matrix_262ctrl_37aml.csv"
sangerData <- read.csv(f)

sangerData$hcdx <- as.Date(sangerData$hcdx)
sangerData$dodx <- as.Date(sangerData$dodx)

sangerPatients <- sub("[a-z]+$", "", sangerData$Sample)
o <- order(sangerPatients, as.numeric(sangerData$hcdx))

sangerData <- sangerData[o,]
sangerPatients <- sangerPatients[o]

clinical_vars <- c("systol", "diastol", "bmi", "cholestl", "triglyc", "hdl", "ldl",
"lym", "mcv", "rdw", "wbc", "plt", "hgb")
sangerX <- sangerData[, colnames(sangerData) %in% c(gene_vars, "age", "gender", clin
ical_vars)]
sangerX <- as.data.frame(sangerX)

sangerX <- sangerX[, colSums(sangerX != 0, na.rm=TRUE) >= thr]
sangerGroups <- factor(grepl("[a-z]", colnames(sangerX))*2, levels=0:2, labels=c(
"Genes", "Demographics", "Blood"))
sangerGroups[names(sangerX) %in% c("age", "gender")] <- "Demographics"
table(sangerGroups)
```

```
## sangerGroups
## Genes Demographics Blood
## 15 2 13
```

```
colnames(sangerX)
```

```
## [1] "ASXL1" "CBL" "DNMT3A" "JAK2" "KMT2C" "KMT2D" "KRAS"
"NF1" "NRAS" "RAD21"
## [11] "SF3B1" "SRSF2" "TET2" "TP53" "U2AF1" "age" "gender"
"systol" "diastol" "bmi"
## [21] "cholest1" "triglyc" "hdl" "ldl" "lym" "mcv" "rdw"
"wbc" "plt" "hgb"
```

sangerGroups

```
## [1] Genes Genes Genes Genes Genes Genes
Genes Genes
## [9] Genes Genes Genes Genes Genes Genes
Genes Demographics
## [17] Demographics Blood Blood Blood Blood Blood
Blood Blood
## [25] Blood Blood Blood Blood Blood Blood
## Levels: Genes Demographics Blood
```

```
g <- sangerGroups=="Genes"
sangerX[g] <- sangerX[g] * 10
names(sangerX)[g] <- paste(names(sangerX[g]),"0.1", sep="_")
y <- StandardizeMagnitude(sangerX[!g])
sangerX <- cbind(sangerX[g],y)

poorMansImpute <- function(x) {x[is.na(x)] <- mean(x, na.rm=TRUE); return(x)}
sangerX <- as.data.frame(sapply(sangerX, poorMansImpute))

foo <- split(sangerData[,c("Diagnosis","hcdte","dodx")], sangerPatients)

bar <- do.call("rbind",lapply(foo, function(x){
  y <- x
  n <- nrow(y)
  y[-n,"Diagnosis"] <- "Control"
  start <- as.numeric(y$hcdte - y$hcdte[1])/365.25
  end <- c(as.numeric(y$hcdte - y$hcdte[1])[-1]/365.25, as.numeric(y$dodx[n] - y
$hcdte[1])/365.25)
  return(data.frame(Diagnosis=y[, "Diagnosis"], start=start, end=end))
}))

bar[1:10, ]
```

|           | Diagnosis<br><fctr> | start<br><dbl> | end<br><dbl> |
|-----------|---------------------|----------------|--------------|
| PD29762   | AML                 | 0.000000       | 9.754962     |
| PD29764   | AML                 | 0.000000       | 10.360027    |
| PD29792   | AML                 | 0.000000       | 14.108145    |
| PD29804   | Control             | 0.000000       | 5.138946     |
| PD29810   | Control             | 0.000000       | 18.573580    |
| PD29836.1 | Control             | 0.000000       | 2.414784     |
| PD29836.2 | AML                 | 2.414784       | 10.023272    |
| PD29851.1 | Control             | 0.000000       | 4.599589     |
| PD29851.2 | AML                 | 4.599589       | 12.205339    |
| PD29856.1 | Control             | 0.000000       | 4.331280     |

1-10 of 10 rows

```
sangerPatientsSplit <- unlist(sapply(names(foo), function(n) rep(n, nrow(foo[[n]]))
)))

sangerSurv <- Surv(time = bar$start, time2 = bar$end, event = bar$Diagnosis!="Cont
rol", origin = 0)

plot(survfit(sangerSurv~ 1), col= "black", main = "VC", xlab='Time after first sam
ple (years)', ylab='AML-free fraction', bty='L', yaxs='i', ylim=c(0,1.01), mark.ti
me = T) #mark = 1
```

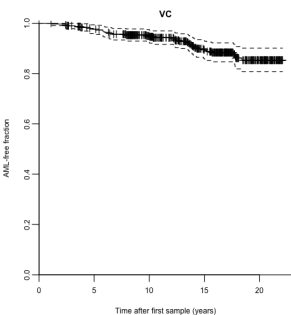

## 10.2 Expected AML incidence

Validation cohort

```
w <- c(which(sangerSurv[,1]==0)[-1]-1, nrow(sangerSurv))
sangerSurv2 <- Surv(sangerSurv[w,2], sangerSurv[w,3])

expected_rate_sanger_cr <- mean(aml_inc_cr(sangerX[w,"gender"],sangerX[w,"age_10"]
*10, sangerX[w,"age_10"]*10+ pmax(1,sangerSurv2[,1]))[!sangerSurv2[,2]])

n_total_sanger <- sum(sangerSurv2[,2])/expected_rate_sanger_cr
n_total_sanger
```

```
## [1] 13277.44
```

Discovery cohort only

```
expected_rate_toronto_cr <- mean(aml_inc_cr(torontoX[, "gender"], torontoX[, "age_10"]
]*10, torontoX[, "age_10"]*10+ pmax(1, torontoSurv[, 1]))/[torontoSurv[, 2]]
```

```
n_total_toronto <- sum(torontoSurv[, 2])/expected_rate_toronto_cr
n_total_toronto
```

```
## [1] 66014.85
```

## 10.3 Combined data

Survival

```
allSurv <- rbind(sangerSurv, Surv(rep(0, nrow(torontoSurv)), torontoSurv[, 1], toro
ntoSurv[, 2]))
allSurv <- Surv(allSurv[, 1], allSurv[, 2], allSurv[, 3])
```

Data matrix

```
cohort <- c(rep("Sanger", nrow(sangerX)), rep("Toronto", nrow(torontoX)))
i <- c(sort(setdiff(gene_vars, "CALR")), "age", "gender")
allX <- rbind(superSet(sangerData, i, fill=0), superSet(torontoData, i, fill=0))
allX <- allX[, colSums(allX>0)>thr]
allX <- cbind(allX, cohort=cohort=="Sanger") + 0
allGroups <- factor(grepl("[A-Z]", colnames(allX))+0, levels=1:0, labels=c("Genes"
, "Demographics"))
```

```
g <- allGroups=="Genes"
allX <- cbind(10*allX[, g], StandardizeMagnitude(allX[, !g]))
colnames(allX)[g] <- paste(colnames(allX)[g], "0.1", sep="_")
control <- c(sangerData$Diagnosis=="Control", torontoData$Diagnosis=="Control")
```

Weights

```
weights <- rep(1, nrow(allX))
weights[cohort=="Sanger" & control] <- n_total_sanger/sum(cohort=="Sanger" & contr
ol & allSurv[, 1]==0)
weights[cohort=="Toronto" & control] <- n_total_toronto/sum(cohort=="Toronto" & co
ntrol)
```

```
n_total <- n_total_sanger + n_total_toronto
n_total
```

```
## [1] 79292.3
```

## 10.4 Coxph model fits

```
sigma0 <- 0.1
nu <- 1
which.mu <- "Genes"
```

### 10.4.1 Discovery cohort

#### 10.4.1.1 Raw

```
fitToronto <- CoxRFX(torontoX, torontoSurv, groups=torontoGroups, which.mu=which.m
u, nu=nu, sigma0=sigma0)
waldToronto <- WaldTest(fitToronto)
```

```
##           group      coef  coef-mu      sd      z df  p.value sig
## ASXL1_0.1   Genes  0.6922  0.049613  0.1172  5.908  1 3.47e-09 ***
## CALR_0.1   Genes  0.6239 -0.018696  0.0710  8.784  1 1.58e-18 ***
## CBL_0.1    Genes  0.5335 -0.109028  0.1293  4.126  1 3.70e-05 ***
## DNMT3A_0.1 Genes  0.5843 -0.058207  0.1059  5.517  1 3.44e-08 ***
## IDH1_0.1   Genes  0.6912  0.048657  0.1245  5.550  1 2.86e-08 ***
## IDH2_0.1   Genes  0.5136 -0.128999  0.1151  4.460  1 8.19e-06 ***
## JAK2_0.1   Genes  0.7120  0.069470  0.1243  5.730  1 1.00e-08 ***
## KDM6A_0.1  Genes  0.6419 -0.000647  0.0590  10.887  1 1.32e-27 ***
## KMT2C_0.1  Genes  0.6658  0.023265  0.0621  10.725  1 7.79e-27 ***
## KRAS_0.1   Genes  0.6403 -0.002210  0.0590  10.855  1 1.89e-27 ***
## NF1_0.1    Genes  0.6412 -0.001393  0.0590  10.870  1 1.61e-27 ***
## PHF6_0.1   Genes  0.6475  0.004993  0.0595  10.891  1 1.27e-27 ***
## PTPN11_0.1 Genes  0.6595  0.016950  0.0592  11.145  1 7.57e-29 ***
## RUNX1_0.1  Genes  0.4100 -0.232587  0.0923  4.443  1 8.89e-06 ***
## SF3B1_0.1  Genes  0.7728  0.130235  0.1019  7.585  1 3.33e-14 ***
## SRSF2_0.1  Genes  0.4783 -0.164235  0.0945  5.062  1 4.16e-07 ***
## TET2_0.1   Genes  0.6389 -0.003667  0.1295  4.932  1 8.13e-07 ***
## TP53_0.1   Genes  0.8079  0.165351  0.0673  12.009  1 3.19e-33 ***
## U2AF1_0.1  Genes  0.8537  0.211135  0.0773  11.048  1 2.23e-28 ***
## age_10     Demographics -0.0836 -0.083628  0.0975 -0.858  1 3.91e-01
## gender     Demographics  0.0113  0.011327  0.1091  0.104  1 9.17e-01
```

```
survConcordance(fitToronto$urv ~ fitToronto$linear.predictors)
```

```
## Call:
## survConcordance(formula = fitToronto$urv ~ fitToronto$linear.predictors)
##
##      n = 497
## Concordance = 0.7538671 se = 0.03218546
## concordant discordant tied.risk tied.time      std(c-d)
## 26561.00      8672.00          0.00          1.00      2267.98
```

### 10.4.2 Validation cohort

## 10.4.2.1 Raw

```
fitSanger <- CoxRFX(sangerX, sangerSurv, groups=sangerGroups, which.mu=which.mu, n
u=nu, sigma0=sigma0)
waldSanger <- WaldTest(fitSanger)
```

```
##              group      coef  coef-mu    sd      z  df  p.value sig
## ASXL1_0.1      Genes  0.64051  0.105357 0.11285  5.676  1 1.38e-08 ***
## CBL_0.1        Genes  0.52291 -0.012246 0.08720  5.997  1 2.01e-09 ***
## DNMT3A_0.1     Genes  0.43301 -0.102144 0.11026  3.927  1 8.60e-05 ***
## JAK2_0.1       Genes  0.52046 -0.014699 0.09655  5.391  1 7.02e-08 ***
## KMT2C_0.1      Genes  0.54634  0.011184 0.08151  6.703  1 2.05e-11 ***
## KMT2D_0.1      Genes  0.42573 -0.109421 0.14122  3.015  1 2.57e-03 **
## KRAS_0.1       Genes  0.53897  0.003816 0.08013  6.726  1 1.74e-11 ***
## NF1_0.1        Genes  0.52911 -0.006044 0.08135  6.504  1 7.80e-11 ***
## NRAS_0.1       Genes  0.53431 -0.000849 0.08011  6.670  1 2.56e-11 ***
## RAD21_0.1      Genes  0.53226 -0.002897 0.08049  6.613  1 3.77e-11 ***
## SF3B1_0.1      Genes  0.53076 -0.004391 0.08104  6.550  1 5.76e-11 ***
## SRSF2_0.1      Genes  0.50357 -0.031583 0.11851  4.249  1 2.14e-05 ***
## TET2_0.1       Genes  0.58716  0.052000 0.10482  5.602  1 2.12e-08 ***
## TP53_0.1       Genes  0.58827  0.053119 0.08077  7.283  1 3.25e-13 ***
## U2AF1_0.1      Genes  0.59395  0.058796 0.08084  7.347  1 2.03e-13 ***
## age_10         Demographics 0.08031  0.080306 0.11847  0.678  1 4.98e-01
## gender         Demographics -0.11803 -0.118029 0.11360 -1.039  1 2.99e-01
## systol_100     Blood  0.01074  0.010736 0.04230  0.254  1 8.00e-01
## diastol_100    Blood  0.02297  0.022974 0.02697  0.852  1 3.94e-01
## bmi_10         Blood  0.09128  0.091285 0.07510  1.215  1 2.24e-01
## cholestl_10    Blood  0.00934  0.009343 0.01381  0.676  1 4.99e-01
## triglyc        Blood  0.02435  0.024354 0.09637  0.253  1 8.00e-01
## hdl            Blood -0.07521 -0.075205 0.07691 -0.978  1 3.28e-01
## ldl            Blood  0.12764  0.127641 0.09931  1.285  1 1.99e-01
## lym            Blood  0.07714  0.077135 0.09427  0.818  1 4.13e-01
## mcv_100        Blood -0.00987 -0.009867 0.00826 -1.195  1 2.32e-01
## rdw_10         Blood  0.06196  0.061956 0.02072  2.990  1 2.79e-03 **
## wbc_10         Blood  0.01894  0.018939 0.03734  0.507  1 6.12e-01
## plt_100        Blood  0.05344  0.053435 0.09405  0.568  1 5.70e-01
## hgb_10         Blood  0.05198  0.051979 0.02446  2.125  1 3.36e-02 *
```

```
survConcordance(sangerSurv ~ fitSanger$linear.predictors)
```

```
## Call:
## survConcordance(formula = sangerSurv ~ fitSanger$linear.predictors)
##
## n = 459
## Concordance= 0.7224015 se= 0.04865039
## concordant discordant tied.risk tied.time std(c-d)
## 6714.0000 2580.0000 0.0000 0.0000 904.3134
```

## 10.4.2.2 Adjusted

```
fitWeightedSanger <- CoxRFX(sangerX, sangerSurv, sangerGroups, which.mu=which.mu,
sigma0=sigma0, nu=nu, weights=weights[cohort=="Sanger"])
waldWeightedSanger <- WaldTest(fitWeightedSanger)
```

```
##              group      coef  coef-mu    sd      z  df  p.value sig
## ASXL1_0.1      Genes  2.634306  0.838861 0.43502  6.05558  1 1.40e-09 ***
## CBL_0.1        Genes  0.630557 -1.164888 1.13502  0.55555  1 5.79e-01
## DNMT3A_0.1     Genes  0.698827 -1.096619 0.22597  3.09251  1 1.98e-03 **
## JAK2_0.1       Genes  0.049363 -1.746082 0.90486  0.05455  1 9.56e-01
## KMT2C_0.1      Genes  1.829655  0.034210 1.05055  1.74162  1 8.16e-02 .
## KMT2D_0.1      Genes -0.004783 -1.800228 0.75790 -0.00631  1 9.95e-01
## KRAS_0.1       Genes  2.139544  0.344099 0.40749  5.25049  1 1.52e-07 ***
## NF1_0.1        Genes  1.252510 -0.542935 0.89204  1.40410  1 1.60e-01
## NRAS_0.1       Genes  1.730987 -0.064459 0.36379  4.75820  1 1.95e-06 ***
## RAD21_0.1      Genes  1.487062 -0.308383 0.68933  2.15726  1 3.10e-02 *
## SF3B1_0.1      Genes  1.309652 -0.485793 0.96376  1.35890  1 1.74e-01
## SRSF2_0.1      Genes  1.451418 -0.344027 0.27015  5.37269  1 7.76e-08 ***
## TET2_0.1       Genes  1.222954 -0.572491 0.12864  9.50695  1 1.96e-21 ***
## TP53_0.1       Genes  4.699561  2.904116 0.91319  5.14632  1 2.66e-07 ***
## U2AF1_0.1      Genes  5.800067  4.004622 0.74776  7.75664  1 8.72e-15 ***
## age_10         Demographics 0.024711  0.024711 0.12062  0.20487  1 8.38e-01
## gender         Demographics -0.140352 -0.140352 0.11358 -1.23575  1 2.17e-01
## systol_100     Blood -0.000324 -0.000324 0.04456 -0.00726  1 9.94e-01
## diastol_100    Blood  0.019654  0.019654 0.02894  0.67907  1 4.97e-01
## bmi_10         Blood  0.101555  0.101555 0.08137  1.24811  1 2.12e-01
## cholestl_10    Blood  0.007469  0.007469 0.01457  0.51275  1 6.08e-01
## triglyc        Blood  0.007316  0.007316 0.10707  0.06832  1 9.46e-01
## hdl            Blood -0.108973 -0.108973 0.08295 -1.31365  1 1.89e-01
## ldl            Blood  0.149658  0.149658 0.10397  1.43938  1 1.50e-01
## lym            Blood  0.066987  0.066987 0.09901  0.67660  1 4.99e-01
## mcv_100        Blood -0.015964 -0.015964 0.00832 -1.91787  1 5.51e-02 .
## rdw_10         Blood  0.073201  0.073201 0.01789  4.09058  1 4.30e-05 ***
## wbc_10         Blood  0.020190  0.020190 0.04345  0.46465  1 6.42e-01
## plt_100        Blood  0.077199  0.077199 0.10027  0.76987  1 4.41e-01
## hgb_10         Blood  0.044376  0.044376 0.02513  1.76558  1 7.75e-02 .
```

```
survConcordance(sangerSurv ~ fitWeightedSanger$linear.predictors, weights=weights[
cohort=="Sanger"])
```

```
## Call:
## survConcordance(formula = sangerSurv ~ fitWeightedSanger$linear.predictors,
## weights = weights[cohort == "Sanger"])
##
## n = 459
## Concordance= 0.7639423 se= 0.04828991
## concordant discordant tied.risk tied.time std(c-d)
## 334537.56 103371.88 0.00 0.00 42293.22
```

```
w <- c(which(sangerSurv[,1]==0)[-1]-1, nrow(sangerSurv))
s <- Surv(sangerSurv[w,2], sangerSurv[w,3])
a <- AUC.uno(s, s, fitWeightedSanger$linear.predictors[w], times= c(0, 22, 0.1))
round(a$iauc, digits = 3)
```

```
## [1] 0.761
```

## 11 Model excluding controls without mutations

Include only controls with ARCH & all pre-AML (regardless of mutation status) ## Discovery cohort (Toronto) Data

```
f = "./arch_data/DC_vaf_matrix_no_duplicates_414ctrl_83aml.csv"
torontoData <- read.csv(f)

gene_vars <- c("CALR", "NRAS", "DNMT3A", "SF3B1", "IDH1", "KIT", "TET2", "RAD21",
"JAK2", "CBL", "KRAS", "PTPN11", "IDH2", "TP53", "NF1", "SRSF2", "CEBPA", "ASXL1",
"RUNX1", "U2AF1", "BCOR", "KDM6A", "PHF6", "KMT2C", "KMT2D")

table(torontoData$Diagnosis)
```

```
##
##      AML Control
##      83      414
```

```
torontoData$gender <- ifelse(torontoData$Sex == "male", 1,
                             ifelse(torontoData$Sex == "female", 0, torontoData$Sex))
dim(torontoData)
```

```
## [1] 497 29
```

```
torontoData <- torontoData[rowSums(torontoData[, colnames(torontoData) %in% gene_vars])>0 | torontoData$Diagnosis == "AML", ]
dim(torontoData)
```

```
## [1] 240 29
```

```
table(torontoData$gender)
```

```
##
##      0  1
## 135 105
```

```
torontoData$gender <- as.numeric(torontoData$gender)
colnames(torontoData)
```

```
## [1] "Sample"      "ASXL1"      "BCOR"      "CALR"      "CBL"      "DNMT3A"
"IDH1"      "IDH2"
## [9] "JAK2"      "KDM6A"      "KIT"      "KMT2C"      "KRAS"      "NF1"
"NRAS"      "PHF6"
## [17] "PTPN11"      "RUNX1"      "SF3B1"      "SRSF2"      "TET2"      "TP53"
"U2AF1"      "Diagnosis"
## [25] "fu_years"      "age"      "Sex"      "no_drivers" "gender"
```

Manually standardize magnitudes

```
torontoData <- torontoData[!duplicated(torontoData),]

torontoX <- torontoData[, colnames(torontoData) %in% c(gene_vars, "age", "gender")
]

torontoX <- as.data.frame(torontoX)
thr <- 2
torontoX <- torontoX[,colSums(torontoX != 0)>=thr]

torontoGroups <- factor(names(torontoX) %in% c("age", "gender")+1, level=1:2, label
s=c("Genes", "Demographics"))
colnames(torontoX)
```

```
## [1] "ASXL1" "CALR" "CBL" "DNMT3A" "IDH1" "IDH2" "JAK2" "KDM6A" "K
MT2C" "KRAS" "NF1" "PHF6"
## [13] "PTPN11" "RUNX1" "SF3B1" "SRSF2" "TET2" "TP53" "U2AF1" "age" "g
ender"
```

```
torontoGroups
```

```
## [1] Genes      Genes      Genes      Genes      Genes      Genes
Genes      Genes
## [9] Genes      Genes      Genes      Genes      Genes      Genes      Genes
Genes      Genes
## [17] Genes      Genes      Genes      Demographics Demographics
## Levels: Genes Demographics
```

```
# Manually standardize age and mutation VAFs
torontoX$age <- torontoX$age/10
names(torontoX)[which(names(torontoX)=="age")] <- "age_10"
g <- torontoGroups == "Genes"
torontoX[,g] <- torontoX[,g]*10
names(torontoX)[g] <- paste(names(torontoX)[g], "0.1", sep="_")
colnames(torontoX)
```

```
## [1] "ASXL1_0.1" "CALR_0.1" "CBL_0.1" "DNMT3A_0.1" "IDH1_0.1" "IDH2_0.1"
" " "JAK2_0.1" "KDM6A_0.1"
## [9] "KMT2C_0.1" "KRAS_0.1" "NF1_0.1" "PHF6_0.1" "PTPN11_0.1" "RUNX1_0.1"
" " "SF3B1_0.1" "SRSF2_0.1"
## [17] "TET2_0.1" "TP53_0.1" "U2AF1_0.1" "age_10" "gender"
```

```
torontoSurv <- Surv(torontoData$fu_years, torontoData$Diagnosis=="AML")
plot(survfit(torontoSurv~ 1), col="black", main="DC", xlab="Time after first sample (years)", ylab="AML-free fraction", bty='L', yaxs='i', ylim=c(0,1.01), mark.time = T)
```

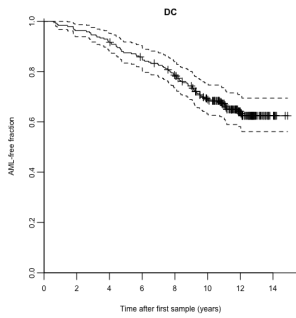

```
plot(survfit(torontoSurv ~ torontoData$Diagnosis), xlab="Time after first sample (years)", main="DC", ylab="AML-free fraction", bty='L', yaxs='i', ylim=c(0,1.01), mark.time = T, col = set1[1:2])
```

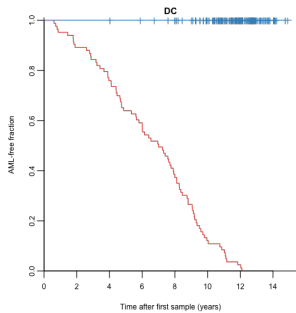

## 11.1 Validation cohort

```
f = "./arch_data/VC_vaf_matrix_262ctrl_37aml.csv"
sangerData <- read.csv(f)
dim(sangerData)
```

```
## [1] 459 52
```

```
sangerData <- sangerData[rowSums(sangerData[, colnames(sangerData) %in% gene_vars]
)>0 | sangerData$Diagnosis == "AML", ]
dim(sangerData)
```

```
## [1] 173 52
```

```
sangerData$hcdx <- as.Date(sangerData$hcdx)
sangerData$dodx <- as.Date(sangerData$dodx)

sangerPatients <- sub("[a-z]+$", "", sangerData$Sample)
o <- order(sangerPatients, as.numeric(sangerData$hcdx))

sangerData <- sangerData[o, ]
sangerPatients <- sangerPatients[o]

clinical_vars <- c("systol", "diastol", "bmi", "cholestl", "triglyc", "hdl", "ldl",
"lym", "mcv", "rdw", "wbc", "plt", "hgb")
sangerX <- sangerData[, colnames(sangerData) %in% c(gene_vars, "age", "gender", clinical_vars)]
sangerX <- as.data.frame(sangerX)

sangerX <- sangerX[, colSums(sangerX != 0, na.rm=TRUE) >= thr]
sangerGroups <- factor(grepl("^[a-z]", colnames(sangerX))*2, levels=0:2, labels=c("Genes", "Demographics", "Blood"))
sangerGroups[names(sangerX) %in% c("age", "gender")] <- "Demographics"
table(sangerGroups)
```

```
## sangerGroups
## Genes Demographics Blood
## 15 2 13
```

```
colnames(sangerX)
```

```
## [1] "ASXL1" "CBL" "DNMT3A" "JAK2" "KMT2C" "KMT2D" "KRAS"
"NF1" "NRAS" "RAD21"
## [11] "SF3B1" "SRSF2" "TET2" "TP53" "U2AF1" "age" "gender"
"systol" "diastol" "bmi"
## [21] "cholestl" "triglyc" "hdl" "ldl" "lym" "mcv" "rdw"
"wbc" "plt" "hgb"
```

```
sangerGroups
```



```
## [1] Genes Genes Genes Genes Genes Genes
Genes Genes
## [9] Genes Genes Genes Genes Genes Genes
Genes Demographics
## [17] Demographics Blood Blood Blood Blood
Blood Blood
## [25] Blood Blood Blood Blood Blood Blood
## Levels: Genes Demographics Blood
```

```
g <- sangerGroups=="Genes"
sangerX[g] <- sangerX[g] * 10
names(sangerX)[g] <- paste(names(sangerX[g]),"0.1", sep="_")
y <- StandardizeMagnitude(sangerX[!g])
sangerX <- cbind(sangerX[g],y)

poorMansImpute <- function(x) {x[is.na(x)] <- mean(x, na.rm=TRUE); return(x)}
sangerX <- as.data.frame(sapply(sangerX, poorMansImpute))

foo <- split(sangerData[,c("Diagnosis","hcdte","dodx")], sangerPatients)

bar <- do.call("rbind",lapply(foo, function(x){
  y <- x
  n <- nrow(y)
  y[-n,"Diagnosis"] <- "Control"
  start <- as.numeric(y$hcdte - y$hcdte[1])/365.25
  end <- c(as.numeric(y$hcdte - y$hcdte[1])[-1])/365.25, as.numeric(y$dodx[n] - y
$hcdte[1])/365.25)
  return(data.frame(Diagnosis=y["Diagnosis"], start=start, end=end))
}))

bar[1:10, ]
```

|           | Diagnosis<br><fctr> | start<br><dbl> | end<br><dbl> |
|-----------|---------------------|----------------|--------------|
| PD29762   | AML                 | 0.000000       | 9.754962     |
| PD29764   | AML                 | 0.000000       | 10.360027    |
| PD29792   | AML                 | 0.000000       | 14.108145    |
| PD29810   | Control             | 0.000000       | 18.573580    |
| PD29836.1 | Control             | 0.000000       | 2.414784     |
| PD29836.2 | AML                 | 2.414784       | 10.023272    |
| PD29851.1 | Control             | 0.000000       | 4.599589     |
| PD29851.2 | AML                 | 4.599589       | 12.205339    |
| PD29856.1 | Control             | 0.000000       | 4.331280     |
| PD29856.2 | AML                 | 4.331280       | 17.828884    |

1-10 of 10 rows

```
sangerPatientsSplit <- unlist(sapply(names(foo), function(n) rep(n, nrow(foo[[n]]))
)))

sangerSurv <- Surv(time = bar$start, time2 = bar$end, event = bar$Diagnosis!="Cont
rol", origin = 0)

plot(survfit(sangerSurv~ 1), col= "black", main = "VC", xlab='Time after first sam
ple (years)', ylab='AML-free fraction', bty='L', yaxs='i', ylim=c(0,1.01), mark.ti
me = T) #mark = 1
```

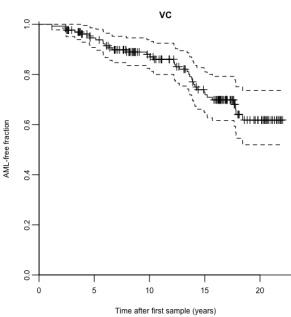

## 11.2 Expected AML incidence

Validation cohort

```
w <- c(which(sangerSurv[,1]==0)[-1]-1, nrow(sangerSurv))
sangerSurv2 <- Surv(sangerSurv[w,2], sangerSurv[w,3]) ## Unique individuals

expected_rate_sanger_cr <- mean(aml_inc_cr(sangerX[w,"gender"],sangerX[w,"age_10"]
*10, sangerX[w,"age_10"]*10+ pmax(1,sangerSurv2[,1]))[!sangerSurv2[,2]])

n_total_sanger <- sum(sangerSurv2[,2])/expected_rate_sanger_cr
n_total_sanger
```

```
## [1] 14208.3
```

Discovery cohort

```
expected_rate_toronto_cr <- mean(aml_inc_cr(torontoX[, "gender"], torontoX[, "age_10"]
]*10, torontoX[, "age_10"]*10+ pmax(1, torontoSurv[, 1])[!torontoSurv[, 2]])
```

```
n_total_toronto <- sum(torontoSurv[, 2])/expected_rate_toronto_cr
n_total_toronto
```

```
## [1] 55688.66
```

## 11.3 Combined data

Survival

```
allSurv <- rbind(sangerSurv, Surv(rep(0, nrow(torontoSurv)), torontoSurv[, 1], toro
ntoSurv[, 2]))
allSurv <- Surv(allSurv[, 1], allSurv[, 2], allSurv[, 3])
```

Data matrix

```
cohort <- c(rep("Sanger", nrow(sangerX)), rep("Toronto", nrow(torontoX)))
i <- c(sort(setdiff(gene_vars, "CALR")), "age", "gender")
allX <- rbind(superSet(sangerData, i, fill=0), superSet(torontoData, i, fill=0))
allX <- allX[, colSums(allX>0)>thr]
allX <- cbind(allX, cohort=cohort=="Sanger") + 0
allGroups <- factor(grepl("[A-Z]", colnames(allX))+0, levels=1:0, labels=c("Genes"
, "Demographics"))
```

```
g <- allGroups=="Genes"
allX <- cbind(10*allX[, g], StandardizeMagnitude(allX[, !g]))
colnames(allX)[g] <- paste(colnames(allX)[g], "0.1", sep="_")
control <- c(sangerData$Diagnosis=="Control", torontoData$Diagnosis=="Control")
```

Weights

```
weights <- rep(1, nrow(allX))
weights[cohort=="Sanger" & control] <- n_total_sanger/sum(cohort=="Sanger" & contr
ol & allSurv[, 1]==0)
weights[cohort=="Toronto" & control] <- n_total_toronto/sum(cohort=="Toronto" & co
ntrol)
```

```
n_total <- n_total_sanger + n_total_toronto
n_total
```

```
## [1] 69896.97
```

## 11.4 Coxph model fits

```
sigma0 <- 0.1
nu <- 1
which.mu <- "Genes"
```

### 11.4.1 DC

#### 11.4.1.1 Raw

```
fitToronto <- CoxRFX(torontoX, torontoSurv, groups=torontoGroups, which.mu=which.m
u, nu=nu, sigma0=sigma0)
waldToronto <- WaldTest(fitToronto)
```

| ##            | group        | coef    | coef-mu   | sd     | z      | df | p.value  | sig |
|---------------|--------------|---------|-----------|--------|--------|----|----------|-----|
| ## ASXL1_0.1  | Genes        | 0.4801  | 0.050389  | 0.1108 | 4.335  | 1  | 1.46e-05 | *** |
| ## CALR_0.1   | Genes        | 0.4076  | -0.022055 | 0.0700 | 5.824  | 1  | 5.76e-09 | *** |
| ## CBL_0.1    | Genes        | 0.3119  | -0.117817 | 0.1151 | 2.710  | 1  | 6.72e-03 | **  |
| ## DNMT3A_0.1 | Genes        | 0.3010  | -0.128687 | 0.1054 | 2.857  | 1  | 4.28e-03 | **  |
| ## IDH1_0.1   | Genes        | 0.4535  | 0.023828  | 0.1092 | 4.152  | 1  | 3.29e-05 | *** |
| ## IDH2_0.1   | Genes        | 0.3789  | -0.050806 | 0.1052 | 3.602  | 1  | 3.15e-04 | *** |
| ## JAK2_0.1   | Genes        | 0.4956  | 0.065922  | 0.1136 | 4.364  | 1  | 1.28e-05 | *** |
| ## KDM6A_0.1  | Genes        | 0.4288  | -0.000932 | 0.0594 | 7.214  | 1  | 5.45e-13 | *** |
| ## KMT2C_0.1  | Genes        | 0.4450  | 0.015284  | 0.0619 | 7.194  | 1  | 6.28e-13 | *** |
| ## KRAS_0.1   | Genes        | 0.4257  | -0.004039 | 0.0595 | 7.156  | 1  | 8.31e-13 | *** |
| ## NF1_0.1    | Genes        | 0.4272  | -0.002451 | 0.0595 | 7.183  | 1  | 6.80e-13 | *** |
| ## PHF6_0.1   | Genes        | 0.4321  | 0.002404  | 0.0598 | 7.230  | 1  | 4.83e-13 | *** |
| ## PTPN11_0.1 | Genes        | 0.4414  | 0.011735  | 0.0596 | 7.407  | 1  | 1.29e-13 | *** |
| ## RUNX1_0.1  | Genes        | 0.2761  | -0.153642 | 0.0890 | 3.102  | 1  | 1.92e-03 | **  |
| ## SF3B1_0.1  | Genes        | 0.5346  | 0.104912  | 0.0892 | 5.993  | 1  | 2.06e-09 | *** |
| ## SRSF2_0.1  | Genes        | 0.3772  | -0.052539 | 0.0883 | 4.274  | 1  | 1.92e-05 | *** |
| ## TET2_0.1   | Genes        | 0.4247  | -0.005040 | 0.1174 | 3.617  | 1  | 2.98e-04 | *** |
| ## TP53_0.1   | Genes        | 0.5441  | 0.114421  | 0.0665 | 8.181  | 1  | 2.81e-16 | *** |
| ## U2AF1_0.1  | Genes        | 0.5788  | 0.149112  | 0.0722 | 8.015  | 1  | 1.10e-15 | *** |
| ## age_10     | Demographics | -0.3093 | -0.309301 | 0.1116 | -2.771 | 1  | 5.59e-03 | **  |
| ## gender     | Demographics | -0.0253 | -0.025329 | 0.1385 | -0.183 | 1  | 8.55e-01 |     |

```
survConcordance(fitToronto$urv ~ fitToronto$linear.predictors, weights = weights[
cohort=="Toronto"])
```

```
## Call:
## survConcordance(formula = fitToronto$urv ~ fitToronto$linear.predictors,
## weights = weights[cohort == "Toronto"])
##
## n = 240
## Concordance = 0.7539084 se = 0.03193557
## concordant discordant tied.risk tied.time std(c-d)
## 3255935.4 1062805.9 0.0 1.0 275842.9
```

#### 11.4.1.2 Adjusted

```
fitWeightedToronto <- CoxRFX(torontoX, torontoSurv, torontoGroups, which.mu=which.
mu, sigma0=sigma0, nu=nu, weights=weights[cohort=="Toronto"])
waldWeightedToronto <- WaldTest(fitWeightedToronto)
```

```
##           group      coef coef-mu   sd      z df p.value sig
## ASXL1_0.1    Genes  1.9719  0.1365 0.150 13.1816 1 1.12e-39 ***
## CALR_0.1     Genes -0.0794 -1.9147 1.174 -0.0676 1 9.46e-01
## CBL_0.1      Genes  0.0165 -1.8188 0.426  0.0388 1 9.69e-01
## DNMT3A_0.1   Genes  0.3722 -1.4631 0.153  2.4301 1 1.51e-02 *
## IDH1_0.1     Genes  2.3375  0.5022 0.350  6.6815 1 2.36e-11 ***
## IDH2_0.1     Genes  0.5915 -1.2438 0.240  2.4621 1 1.38e-02 *
## JAK2_0.1     Genes  1.7762 -0.0592 0.193  9.2213 1 2.94e-20 ***
## KDM6A_0.1    Genes  1.6689 -0.1664 0.362  4.6081 1 4.06e-06 ***
## KMT2C_0.1    Genes -1.2330 -3.0683 1.191 -1.0356 1 3.00e-01
## KRAS_0.1     Genes  0.9875 -0.8478 0.555  1.7785 1 7.53e-02 .
## NF1_0.1      Genes  1.3623 -0.4730 0.501  2.7193 1 6.54e-03 **
## PHF6_0.1     Genes  2.6990  0.8636 0.255 10.5887 1 3.36e-26 ***
## PTPN11_0.1   Genes  3.6339  1.7986 0.723  5.0228 1 5.09e-07 ***
## RUNX1_0.1    Genes  0.6233 -1.2120 0.136  4.5906 1 4.42e-06 ***
## SF3B1_0.1    Genes  3.1088  1.2735 0.305 10.1981 1 2.02e-24 ***
## SRSF2_0.1    Genes  1.4956 -0.3397 0.172  8.6791 1 3.99e-18 ***
## TET2_0.1     Genes  0.5772 -1.2581 0.232  2.4920 1 1.27e-02 *
## TP53_0.1     Genes  8.9422  7.1069 0.823 10.8665 1 1.66e-27 ***
## U2AF1_0.1    Genes  4.0190  2.1836 0.384 10.4738 1 1.14e-25 ***
## age_10      Demographics -0.5274 -0.5274 0.135 -3.9171 1 8.96e-05 ***
## gender      Demographics  0.0323  0.0323 0.175  0.1842 1 8.54e-01
```

```
survConcordance(fitWeightedToronto$urv ~ fitWeightedToronto$linear.predictors, we
ights=weights[cohort=="Toronto"])
```

```
## Call:
## survConcordance(formula = fitWeightedToronto$urv ~ fitWeightedToronto$linear.p
redictors,
## weights = weights[cohort == "Toronto"])
##
## n= 240
## Concordance= 0.7701663 se= 0.03193557
## concordant discordant tied.risk tied.time std(c-d)
## 3326148.9 992592.4 0.0 1.0 275842.9
```

```
#Uno's estimator of cumulative/dynamic AUC
a <- AUC.uno(torontoSurv, torontoSurv, fitWeightedToronto$linear.predictors, times
= seq(0,12, 0.1))
round(a$iauc, digits = 3)
```

```
## [1] 0.756
```

## 11.4.2 Validation cohort

### 11.4.2.1 Raw

```
fitSanger <- CoxRFX(sangerX, sangerSurv, groups=sangerGroups, which.mu=which.mu, n
u=nu, sigma0=sigma0)
waldSanger <- WaldTest(fitSanger)
```

```
##           group      coef coef-mu   sd      z df p.value sig
## ASXL1_0.1    Genes  0.41389  1.04e-01 0.13253  3.1229 1 1.79e-03 **
## CBL_0.1      Genes  0.27978 -3.01e-02 0.10678  2.6202 1 8.79e-03 **
## DNMT3A_0.1   Genes  0.15476 -1.55e-01 0.12703  1.2183 1 2.23e-01
## JAK2_0.1     Genes  0.33012  2.02e-02 0.10874  3.0359 1 2.40e-03 **
## KMT2C_0.1    Genes  0.30175 -8.17e-03 0.09722  3.1037 1 1.91e-03 **
## KMT2D_0.1    Genes  0.14350 -1.66e-01 0.15722  0.9127 1 3.61e-01
## KRAS_0.1     Genes  0.30998  5.67e-05 0.09168  3.3811 1 7.22e-04 ***
## NF1_0.1      Genes  0.29225 -1.77e-02 0.09499  3.0768 1 2.09e-03 **
## NRAS_0.1     Genes  0.30685 -3.07e-03 0.09158  3.3507 1 8.06e-04 ***
## RAD21_0.1    Genes  0.29301 -1.69e-02 0.09373  3.1261 1 1.77e-03 **
## SF3B1_0.1    Genes  0.29894 -1.10e-02 0.09393  3.1825 1 1.46e-03 **
## SRSF2_0.1    Genes  0.40493  9.50e-02 0.13441  3.0125 1 2.59e-03 **
## TET2_0.1     Genes  0.37910  6.92e-02 0.11275  3.3624 1 7.73e-04 ***
## TP53_0.1     Genes  0.36746  5.75e-02 0.09308  3.9479 1 7.88e-05 ***
## U2AF1_0.1    Genes  0.37254  6.26e-02 0.09357  3.9813 1 6.85e-05 ***
## age_10      Demographics -0.01773 -1.77e-02 0.11451 -0.1548 1 8.77e-01
## gender      Demographics -0.03369 -3.37e-02 0.10501 -0.3208 1 7.48e-01
## systol_100  Blood  0.00145  1.45e-03 0.03839  0.0377 1 9.70e-01
## diastol_100 Blood  0.00773  7.73e-03 0.02329  0.3321 1 7.40e-01
## bmi_10       Blood  0.06828  6.83e-02 0.07091  0.9628 1 3.36e-01
## cholest_10   Blood  0.01797  1.80e-02 0.01274  1.4109 1 1.58e-01
## triglyc     Blood  0.00471  4.71e-03 0.09569  0.0492 1 9.61e-01
## hdl          Blood -0.00891 -8.91e-03 0.07257 -0.1227 1 9.02e-01
## ldl          Blood  0.16056  1.61e-01 0.09725  1.6510 1 9.87e-02 .
## lym          Blood -0.02015 -2.01e-02 0.08835 -0.2280 1 8.20e-01
## mcv_100     Blood -0.00369 -3.69e-03 0.00786 -0.4694 1 6.39e-01
## rdw_10      Blood  0.05420  5.42e-02 0.02080  2.6056 1 9.17e-03 **
## wbc_10      Blood  0.00379  3.79e-03 0.03521  0.1077 1 9.14e-01
## plt_100     Blood  0.03410  3.41e-02 0.09166  0.3720 1 7.10e-01
## hgb_10      Blood  0.03314  3.31e-02 0.02245  1.4763 1 1.40e-01
```

RDW p-val 9.171138e-03

```
survConcordance(sangerSurv ~ fitSanger$linear.predictors)
```

```
## Call:
## survConcordance(formula = sangerSurv ~ fitSanger$linear.predictors)
##
## n= 173
## Concordance= 0.6611972 se= 0.05025086
## concordant discordant tied.risk tied.time std(c-d)
## 2176.0000 1115.0000 0.0000 0.0000 330.7512
```

### 11.4.2.2 Adjusted

```
fitWeightedSanger <- CoxRFX(sangerX, sangerSurv, sangerGroups, which.mu=which.mu,
sigma0=sigma0, nu=nu, weights=weights[cohort=="Sanger"])
waldWeightedSanger <- WaldTest(fitWeightedSanger)
```

```
##
## ASXL1_0.1      group      coef      coef-mu      sd          z      df      p.value sig
## CBL_0.1       Genes -0.660213 -1.826614 1.39628 -0.47284 1 6.36e-01
## DNMT3A_0.1    Genes 0.223151 -0.943251 0.24504 0.91066 1 3.62e-01
## JAK2_0.1     Genes 0.705927 -0.460474 1.04486 0.67562 1 4.99e-01
## KMT2C_0.1    Genes -0.385529 -1.551931 1.44435 -0.26692 1 7.90e-01
## KMT2D_0.1    Genes -0.627231 -1.793633 1.03607 -0.60539 1 5.45e-01
## KRAS_0.1     Genes 1.299133 0.132731 0.78999 1.64450 1 1.00e-01
## NF1_0.1      Genes -0.815764 -1.982166 1.46470 -0.55695 1 5.78e-01
## NRAS_0.1     Genes 0.728314 -0.438088 0.64251 1.13355 1 2.57e-01
## RAD21_0.1    Genes -0.678392 -1.844793 1.44210 -0.47042 1 6.38e-01
## SF3B1_0.1    Genes 0.072745 -1.093657 1.47708 0.04925 1 9.61e-01
## SRSF2_0.1    Genes 1.726024 0.559622 0.23912 7.21826 1 5.27e-13 ***
## TET2_0.1     Genes 1.101278 -0.065124 0.15079 7.30320 1 2.81e-13 ***
## TP53_0.1     Genes 4.694801 3.528400 1.13074 4.15198 1 3.30e-05 ***
## U2AF1_0.1    Genes 7.530821 6.364419 1.06931 7.04270 1 1.89e-12 ***
## age_10      Demographics -0.190256 -0.190256 0.13151 -1.44666 1 1.48e-01
## gender      Demographics -0.029742 -0.029742 0.12174 -0.24430 1 8.07e-01
## systol_100  Blood -0.032537 -0.032537 0.04764 -0.68293 1 4.95e-01
## diastol_100 Blood 0.000105 0.000105 0.02958 0.00356 1 9.97e-01
## bmi_10      Blood 0.098774 0.098774 0.08970 1.10111 1 2.71e-01
## cholestl_10 Blood 0.024226 0.024226 0.01553 1.55989 1 1.19e-01
## triglyc     Blood 0.051097 0.051097 0.11392 0.44854 1 6.54e-01
## hdl         Blood -0.082426 -0.082426 0.09326 -0.88380 1 3.77e-01
## ldl         Blood 0.248075 0.248075 0.11127 2.22950 1 2.58e-02 *
## lym         Blood -0.054414 -0.054414 0.10621 -0.51234 1 6.08e-01
## mcv_100    Blood -0.010783 -0.010783 0.00915 -1.17903 1 2.38e-01
## rdw_10     Blood 0.095279 0.095279 0.01797 5.30078 1 1.15e-07 ***
## wbc_10     Blood 0.011314 0.011314 0.04898 0.23099 1 8.17e-01
## plt_100    Blood 0.057755 0.057755 0.11248 0.51347 1 6.08e-01
## hgb_10     Blood 0.016212 0.016212 0.02615 0.62004 1 5.35e-01
```

```
survConcordance(sangerSurv ~ fitWeightedSanger$linear.predictors, weights=weights[
cohort=="Sanger"])
```

```
## Call:
## survConcordance(formula = sangerSurv ~ fitWeightedSanger$linear.predictors,
## weights = weights[cohort == "Sanger"])
##
## n = 173
## Concordance = 0.7231124 se = 0.0489519
## concordant discordant tied.risk tied.time std(c-d)
## 296852.77 113668.16 0.00 0.00 40191.56
```

```
#Uno's estimator of cumulative/dynamic AUC
w <- c(which(sangerSurv[,1]==0)[-1]-1, nrow(sangerSurv))
s <- Surv(sangerSurv[w,2], sangerSurv[w,3])
a <- AUC.uno(s, s, fitWeightedSanger$linear.predictors[w], times = c(0, 22, 0.1))
round(a$iauc, digits = 3)
```

```
## [1] 0.403
```

## 12 CoxPH model excluding all samples without ARCH-PD

### 12.1 Discovery cohort

Data

```
f = "./arch_data/DC_vaf_matrix_414ctrl_91aml.csv"
torontoData <- read.csv(f)

gene_vars <- c("CALR", "NRAS", "DNMT3A", "SF3B1", "IDH1", "KIT", "TET2", "RAD21",
"JAK2", "CBL", "KRAS", "PTPN11", "IDH2", "TP53", "NF1", "SRSF2", "CEBPA", "ASXL1",
"RUNX1", "U2AF1", "BCOR", "KDM6A", "PHF6", "KMT2C", "KMT2D")

table(torontoData$Diagnosis)
```

```
##
## AML Control
## 91 414
```

```
torontoData$gender <- ifelse(torontoData$Sex == "male", 1,
ifelse(torontoData$Sex == "female", 0, torontoData$Sex))
dim(torontoData)
```

```
## [1] 505 29
```

```
torontoData <- torontoData[rowSums(torontoData[, colnames(torontoData) %in% gene_v
ars])>0, ]
dim(torontoData)
```

```
## [1] 221 29
```

```
table(torontoData$gender)
```

```
##
## 0 1
## 126 95
```

```
torontoData$gender <- as.numeric(torontoData$gender)
colnames(torontoData)
```

```
## [1] "Sample" "ASXL1" "BCOR" "CALR" "CBL" "DNMT3A"
"IDH1" "IDH2"
## [9] "JAK2" "KDM6A" "KIT" "KMT2C" "KRAS" "NF1"
"NRAS" "PHF6"
## [17] "PTPN11" "RUNX1" "SF3B1" "SRSF2" "TET2" "TP53"
"U2AF1" "Diagnosis"
## [25] "fu_years" "age" "Sex" "no_drivers" "gender"
```

#### Manually standardize magnitudes

```
torontoData <- torontoData[!duplicated(torontoData),]

torontoX <- torontoData[, colnames(torontoData) %in% c(gene_vars, "age", "gender")
]

torontoX <- as.data.frame(torontoX)
thr <- 2
torontoX <- torontoX[,colSums(torontoX != 0)>=thr]

torontoGroups <- factor(names(torontoX) %in% c("age","gender")+1, level=1:2, label
s=c("Genes","Demographics"))
colnames(torontoX)
```

```
## [1] "ASXL1" "CALR" "CBL" "DNMT3A" "IDH1" "IDH2" "JAK2" "KDM6A" "K
MT2C" "KRAS" "NF1" "PHF6"
## [13] "PTPN11" "RUNX1" "SF3B1" "SRSF2" "TET2" "TP53" "U2AF1" "age" "g
ender"
```

```
torontoGroups
```

```
## [1] Genes Genes Genes Genes Genes Genes
Genes Genes
## [9] Genes Genes Genes Genes Genes Genes
Genes Genes
## [17] Genes Genes Genes Demographics Demographics
## Levels: Genes Demographics
```

#### Manually standardize age and mutation VAFs

```
torontoX$age <- torontoX$age/10
names(torontoX)[which(names(torontoX)=="age")] <- "age_10"
g <- torontoGroups == "Genes"
torontoX[,g] <- torontoX[,g]*10
names(torontoX)[g] <- paste(names(torontoX)[g], "0.1",sep="_")
colnames(torontoX)
```

```
## [1] "ASXL1_0.1" "CALR_0.1" "CBL_0.1" "DNMT3A_0.1" "IDH1_0.1" "IDH2_0.1"
"JAK2_0.1" "KDM6A_0.1"
## [9] "KMT2C_0.1" "KRAS_0.1" "NF1_0.1" "PHF6_0.1" "PTPN11_0.1" "RUNX1_0.
1" "SF3B1_0.1" "SRSF2_0.1"
## [17] "TET2_0.1" "TP53_0.1" "U2AF1_0.1" "age_10" "gender"
```

```
torontoSurv <- Surv(torontoData$fu_years, torontoData$Diagnosis=="AML")
plot(survfit(torontoSurv~ 1), col="black", main = "DC", xlab='Time after first sa
mple (years)', ylab='AML-free fraction', bty='L', yaxs='i', ylim=c(0,1.01), mark.t
ime = T)
```

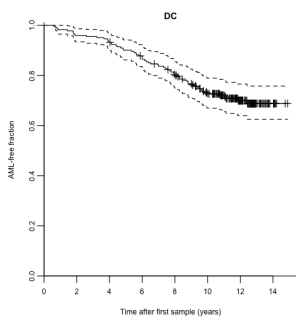

```
plot(survfit(torontoSurv ~ torontoData$Diagnosis), xlab='Time after first sample (
years)', main = "DC", ylab='AML-free fraction', bty='L', yaxs='i', ylim=c(0,1.01),
mark.time = T, col = set1[1:2])
```

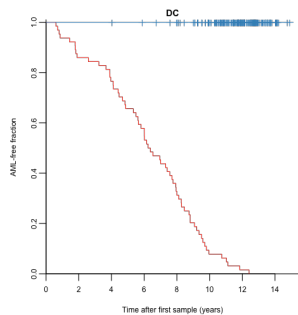

## 12.2 Validation cohort

```
f = "./arch_data/VC_vaf_matrix_no_duplicates_262ctrl_29aml.csv"
sangerData <- read.csv(f)
dim(sangerData)
```

```
## [1] 445 52
```

```
sangerData <- sangerData[rowSums(sangerData[, colnames(sangerData) %in% gene_vars]
)>0, ]
dim(sangerData)
```

```
## [1] 149 52
```

```
sangerData$hcdx <- as.Date(sangerData$hcdx)
sangerData$dodx <- as.Date(sangerData$dodx)

sangerPatients <- sub("[a-z]+$", "", sangerData$Sample)
o <- order(sangerPatients, as.numeric(sangerData$hcdx))

sangerData <- sangerData[o, ]
sangerPatients <- sangerPatients[o]

clinical_vars <- c("systol", "diastol", "bmi", "cholestl", "triglyc", "hdl", "ldl",
"lym", "mcv", "rdw", "wbc", "plt", "hgb")
sangerX <- sangerData[, colnames(sangerData) %in% c(gene_vars, "age", "gender", clinical_vars)]
sangerX <- as.data.frame(sangerX)

sangerX <- sangerX[, colSums(sangerX != 0, na.rm=TRUE) >= thr]
sangerGroups <- factor(grepl("[a-z]", colnames(sangerX))*2, levels=0:2, labels=c("Genes", "Demographics", "Blood"))
sangerGroups[names(sangerX) %in% c("age", "gender")] <- "Demographics"
table(sangerGroups)
```

```
## sangerGroups
##      Genes Demographics      Blood
##      15           2          13
```

```
colnames(sangerX)
```

```
## [1] "ASXL1" "CBL" "DNMT3A" "JAK2" "KMT2C" "KMT2D" "KRAS"
"NF1" "NRAS" "RAD21"
## [11] "SF3B1" "SRSF2" "TET2" "TP53" "U2AF1" "age" "gender"
"systol" "diastol" "bmi"
## [21] "cholestl" "triglyc" "hdl" "ldl" "lym" "mcv" "rdw"
"wbc" "plt" "hgb"
```

```
sangerGroups
```

```
## [1] Genes Genes Genes Genes Genes Genes
Genes Genes
## [9] Genes Genes Genes Genes Genes Genes
Genes Demographics
## [17] Demographics Blood Blood Blood Blood Blood
Blood Blood
## [25] Blood Blood Blood Blood Blood Blood
## Levels: Genes Demographics Blood
```

```

g <- sangerGroups=="Genes"
sangerX[g] <- sangerX[g] * 10
names(sangerX)[g] <- paste(names(sangerX[g]),"0.1", sep="_")
y <- StandardizeMagnitude(sangerX[!g])
sangerX <- cbind(sangerX[g],y)

poorMansImpute <- function(x) {x[is.na(x)] <- mean(x, na.rm=TRUE); return(x)}
sangerX <- as.data.frame(apply(sangerX, poorMansImpute))

foo <- split(sangerData[,c("Diagnosis","hcdx","dodx")], sangerPatients)

bar <- do.call("rbind",lapply(foo, function(x){
  y <- x
  n <- nrow(y)
  y[-n,"Diagnosis"] <- "Control"
  start <- as.numeric(y$hcdx[1])/365.25
  end <- c(as.numeric(y$hcdx[1])[-1]/365.25, as.numeric(y$dodx[n] - y
$hcdx[1])/365.25)
  return(data.frame(Diagnosis=y["Diagnosis"], start=start, end=end))
}))

bar[1:10, ]

```

|           | Diagnosis<br><fctr> | start<br><dbl> | end<br><dbl> |
|-----------|---------------------|----------------|--------------|
| PD29762   | AML                 | 0.000000       | 9.754962     |
| PD29764   | AML                 | 0.000000       | 10.360027    |
| PD29792   | AML                 | 0.000000       | 14.108145    |
| PD29810   | Control             | 0.000000       | 18.573580    |
| PD29836.1 | Control             | 0.000000       | 2.414784     |
| PD29836.2 | AML                 | 2.414784       | 10.023272    |
| PD29856   | AML                 | 0.000000       | 17.828884    |
| PD29896   | AML                 | 0.000000       | 6.387406     |
| PD29918.1 | Control             | 0.000000       | 5.442847     |
| PD29918.2 | AML                 | 5.442847       | 13.396304    |

1-10 of 10 rows

```

sangerPatientsSplit <- unlist(sapply(names(foo), function(n) rep(n, nrow(foo[[n]]))
)))

sangerSurv <- Surv(time = bar$start, time2 = bar$end, event = bar$Diagnosis!="Cont
rol", origin = 0)

plot(survfit(sangerSurv~ 1), col= "black", main = "VC", xlab="Time after first sam
ple (years)", ylab="AML-free fraction", bty='L', yaxs='i', ylim=c(0,1.01), mark.ti
me = T) #mark = I

```

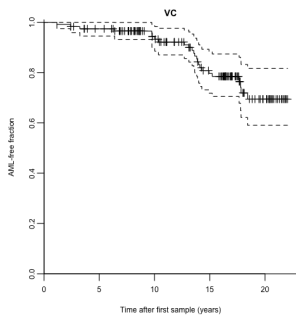

## 12.3 Expected AML incidence

Validation cohort

```

w <- c(which(sangerSurv[,1]==0)[-1]-1, nrow(sangerSurv))
sangerSurv2 <- Surv(sangerSurv[w,2], sangerSurv[w,3])

expected_rate_sanger_cr <- mean(aml_inc_cr(sangerX[w,"gender"],sangerX[w,"age_10"]
*10, sangerX[w,"age_10"]*10+ pmax(1,sangerSurv2[,1]))[!sangerSurv2[,2]])

n_total_sanger <- sum(sangerSurv2[,2])/expected_rate_sanger_cr
n_total_sanger

```

```
## [1] 9216.197
```

Discovery cohort

```

expected_rate_toronto_cr <- mean(aml_inc_cr(torontoX[, "gender"],torontoX[, "age_10"
]*10, torontoX[, "age_10"]*10+ pmax(1,torontoSurv[,1]))[!torontoSurv[,2]])

n_total_toronto <- sum(torontoSurv[,2])/expected_rate_toronto_cr
n_total_toronto

```

```
## [1] 42940.66
```

## 12.4 Combined data

Survival

```
allSurv <- rbind(sangerSurv, Surv(rep(0, nrow(torontoSurv)), torontoSurv[,1], torontoSurv[,2]))
allSurv <- Surv(allSurv[,1], allSurv[,2], allSurv[,3])
```

Data matrix

```
cohort <- c(rep("Sanger", nrow(sangerX)), rep("Toronto", nrow(torontoX)))
i <- c(sort(setdiff(gene_vars, "CALR"), "age", "gender"))
allX <- rbind(superSet(sangerData, i, fill=0), superSet(torontoData, i, fill=0))
allX <- allX[,colSums(allX>0)>=thr]
allX <- cbind(allX, cohort=cohort=="Sanger") + 0
allGroups <- factor(grepl("^[A-Z]", colnames(allX))+0, levels=1:0, labels=c("Genes", "Demographics"))

g <- allGroups=="Genes"
allX <- cbind(10*allX[,g], StandardizeMagnitude(allX[,!g]))
colnames(allX)[g] <- paste(colnames(allX)[g], "0.1", sep=" ")
control <- c(sangerData$Diagnosis=="Control", torontoData$Diagnosis=="Control")
```

Weights

```
weights <- rep(1, nrow(allX))
weights[cohort=="Sanger" & control] <- n_total_sanger/sum(cohort=="Sanger" & control & allSurv[,1]==0)
weights[cohort=="Toronto" & control] <- n_total_toronto/sum(cohort=="Toronto" & control)

n_total <- n_total_sanger + n_total_toronto
n_total
```

```
## [1] 52156.85
```

## 12.5 Coxph model fits

```
sigma0 <- 0.1
nu <- 1
which.mu <- "Genes"
```

### 12.5.1 Toronto

#### 12.5.1.1 Raw

```
fitToronto <- CoxRFX(torontoX, torontoSurv, groups=torontoGroups, which.mu=which.mu, nu=nu, sigma0=sigma0)
waldToronto <- WaldTest(fitToronto)
```

| ## | group      | coef         | coef-mu | sd        | z      | df     | p.value    | sig |
|----|------------|--------------|---------|-----------|--------|--------|------------|-----|
| ## | ASXL1_0.1  | Genes        | 0.5750  | 0.032700  | 0.1158 | 4.964  | 1 6.91e-07 | *** |
| ## | CALR_0.1   | Genes        | 0.5200  | -0.022339 | 0.0744 | 6.990  | 1 2.74e-12 | *** |
| ## | CBL_0.1    | Genes        | 0.4268  | -0.115522 | 0.1231 | 3.469  | 1 5.23e-04 | *** |
| ## | DNMT3A_0.1 | Genes        | 0.4724  | -0.069936 | 0.1062 | 4.448  | 1 8.66e-06 | *** |
| ## | IDH1_0.1   | Genes        | 0.5730  | 0.030722  | 0.1188 | 4.822  | 1 1.42e-06 | *** |
| ## | IDH2_0.1   | Genes        | 0.4711  | -0.071177 | 0.1126 | 4.184  | 1 2.86e-05 | *** |
| ## | JAK2_0.1   | Genes        | 0.6084  | 0.066072  | 0.1214 | 5.011  | 1 5.43e-07 | *** |
| ## | KDM6A_0.1  | Genes        | 0.5420  | -0.000284 | 0.0628 | 8.629  | 1 6.17e-18 | *** |
| ## | KMT2C_0.1  | Genes        | 0.5603  | 0.017953  | 0.0656 | 8.545  | 1 1.29e-17 | *** |
| ## | KRAS_0.1   | Genes        | 0.5394  | -0.002952 | 0.0628 | 8.583  | 1 9.20e-18 | *** |
| ## | NF1_0.1    | Genes        | 0.5404  | -0.001954 | 0.0628 | 8.599  | 1 8.07e-18 | *** |
| ## | PHF6_0.1   | Genes        | 0.5469  | 0.004542  | 0.0632 | 8.655  | 1 4.91e-18 | *** |
| ## | PTPN11_0.1 | Genes        | 0.5556  | 0.013243  | 0.0631 | 8.810  | 1 1.25e-18 | *** |
| ## | RUNX1_0.1  | Genes        | 0.3347  | -0.207621 | 0.0917 | 3.650  | 1 2.62e-04 | *** |
| ## | SF3B1_0.1  | Genes        | 0.6532  | 0.110858  | 0.0963 | 6.781  | 1 1.19e-11 | *** |
| ## | SRSF2_0.1  | Genes        | 0.4370  | -0.105330 | 0.0920 | 4.750  | 1 2.03e-06 | *** |
| ## | TET2_0.1   | Genes        | 0.5053  | -0.037059 | 0.1248 | 4.050  | 1 5.12e-05 | *** |
| ## | TP53_0.1   | Genes        | 0.7280  | 0.185639  | 0.0825 | 8.828  | 1 1.07e-18 | *** |
| ## | U2AF1_0.1  | Genes        | 0.7148  | 0.172443  | 0.0805 | 8.879  | 1 6.76e-19 | *** |
| ## | age_10     | Demographics | -0.0236 | -0.023625 | 0.1092 | -0.216 | 1 8.29e-01 |     |
| ## | gender     | Demographics | -0.0832 | -0.083228 | 0.1113 | -0.748 | 1 4.55e-01 |     |

```
survConcordance(fitToronto$urv ~ fitToronto$linear.predictors)
```

```
## Call:
## survConcordance(formula = fitToronto$urv ~ fitToronto$linear.predictors)
##
## n = 221
## Concordance= 0.7806171 se= 0.03687602
## concordant discordant tied.risk tied.time std(c-d)
## 8981.0000 2524.0000 0.0000 1.0000 848.5173
```

#### 12.5.1.2 Adjusted

```
fitWeightedToronto <- CoxRFX(torontoX, torontoSurv, torontoGroups, which.mu=which.mu, sigma0=sigma0, nu=nu, weights=weights[cohort=="Toronto"])
waldWeightedToronto <- WaldTest(fitWeightedToronto)
```



```
##
## ASXL1_0.1      Genes  1.9878  0.06756  0.150  13.267  1  3.60e-40 ***
## CALR_0.1      Genes  0.6189 -1.30126  0.758  0.817  1  4.14e-01
## CBL_0.1       Genes  0.2531 -1.66705  0.379  0.668  1  5.04e-01
## DNMT3A_0.1   Genes  0.5859 -1.33434  0.136  4.313  1  1.61e-05 ***
## IDH1_0.1     Genes  2.4124  0.49218  0.341  7.083  1  1.41e-12 ***
## IDH2_0.1     Genes  0.8067 -1.11352  0.231  3.498  1  4.70e-04 ***
## JAK2_0.1     Genes  1.9535  0.03333  0.193  10.131  1  4.01e-24 ***
## KDM6A_0.1    Genes  1.9181 -0.00209  0.163  11.792  1  4.31e-32 ***
## KMT2C_0.1    Genes  2.3735  0.45328  0.730  3.250  1  1.16e-03 **
## KRAS_0.1     Genes  1.7434 -0.17684  0.195  8.955  1  3.38e-19 ***
## NF1_0.1      Genes  1.8059 -0.11434  0.190  9.518  1  1.77e-21 ***
## PHF6_0.1     Genes  2.2276  0.30741  0.144  15.462  1  6.24e-54 ***
## PTPN11_0.1   Genes  2.5970  0.67679  0.277  9.366  1  7.52e-21 ***
## RUNX1_0.1    Genes  0.7172 -1.20303  0.137  5.235  1  1.65e-07 ***
## SF3B1_0.1    Genes  3.2528  1.33260  0.321  10.149  1  3.36e-24 ***
## SRSF2_0.1    Genes  1.4698 -0.45035  0.170  8.656  1  4.91e-18 ***
## TET2_0.1     Genes  0.5707 -1.34952  0.211  2.699  1  6.96e-03 **
## TP53_0.1     Genes  5.2413  3.32111  0.440  11.916  1  9.82e-33 ***
## U2AF1_0.1    Genes  3.9483  2.02809  0.365  10.817  1  2.87e-27 ***
## age_10       Demographics -0.0820 -0.08201  0.117 -0.700  1  4.84e-01
## gender       Demographics -0.0899 -0.08989  0.117 -0.771  1  4.41e-01
```

```
survConcordance(fitWeightedToronto$Surv ~ fitWeightedToronto$linear.predictors, weights=weights[cohort=="Toronto"])
```

```
## Call:
## survConcordance(formula = fitWeightedToronto$Surv ~ fitWeightedToronto$linear.predictors,
## weights = weights[cohort == "Toronto"])
##
## n = 221
## Concordance = 0.8454794 se = 0.03633541
## concordant discordant tied.risk tied.time std(c-d)
## 2196217.1 401382.8 0.0 1.0 188769.7
```

Uno's estimator of cumulative/dynamic AUC

```
a <- AUC.uno(torontoSurv, torontoSurv, fitWeightedToronto$linear.predictors, times = seq(0,12, 0.1))
round(a$iauc, digits = 3)
```

```
## [1] 0.791
```

## 12.5.2 Validation cohort

### 12.5.2.1 Raw

```
fitSanger <- CoxRFX(sangerX, sangerSurv, groups=sangerGroups, which.mu=which.mu, n.u=nu, sigma0=sigma0)
waldSanger <- WaldTest(fitSanger)
```

```
##
## ASXL1_0.1      Genes  0.673478  0.158950  0.12882  5.22794  1  1.71e-07 ***
## CBL_0.1       Genes  0.495353 -0.019175  0.10735  4.61426  1  3.94e-06 ***
## DNMT3A_0.1   Genes  0.328415 -0.186113  0.13178  2.49210  1  1.27e-02 *
## JAK2_0.1     Genes  0.493355 -0.021173  0.11739  4.20278  1  2.64e-05 ***
## KMT2C_0.1    Genes  0.519077  0.004549  0.10042  5.16888  1  2.36e-07 ***
## KMT2D_0.1    Genes  0.341708 -0.172820  0.16670  2.04989  1  4.04e-02 *
## KRAS_0.1     Genes  0.517799  0.003272  0.09650  5.36592  1  8.05e-08 ***
## NF1_0.1      Genes  0.501902 -0.012625  0.09919  5.06022  1  4.19e-07 ***
## NRAS_0.1     Genes  0.534425  0.019897  0.09703  5.50790  1  3.63e-08 ***
## RAD21_0.1    Genes  0.503868 -0.010660  0.09793  5.14544  1  2.67e-07 ***
## SF3B1_0.1    Genes  0.507855 -0.006673  0.09801  5.18184  1  2.20e-07 ***
## SRSF2_0.1    Genes  0.529928  0.015400  0.14168  3.74021  1  1.84e-04 ***
## TET2_0.1     Genes  0.593720  0.079192  0.12273  4.83743  1  1.32e-06 ***
## TP53_0.1     Genes  0.584538  0.070010  0.09773  5.98121  1  2.21e-09 ***
## U2AF1_0.1    Genes  0.592496  0.077968  0.09770  6.06442  1  1.32e-09 ***
## age_10       Demographics  0.084731  0.084731  0.12166  0.69645  1  4.86e-01
## gender       Demographics -0.007960 -0.007960  0.10340 -0.07698  1  9.39e-01
## systol_100   Blood  0.033564  0.033564  0.03644  0.92111  1  3.57e-01
## diastol_100  Blood  0.032432  0.032432  0.02299  1.41095  1  1.58e-01
## bmi_10       Blood  0.081752  0.081752  0.06892  1.18610  1  2.36e-01
## cholest_10   Blood  0.014082  0.014082  0.01344  1.04742  1  2.95e-01
## triglyc      Blood -0.000827 -0.000827  0.10813 -0.00765  1  9.94e-01
## hdl          Blood -0.007587 -0.007587  0.06927 -0.10952  1  9.13e-01
## ldl          Blood  0.134372  0.134372  0.11043  1.21684  1  2.24e-01
## lym          Blood  0.076500  0.076500  0.08867  0.86278  1  3.88e-01
## mcv_100     Blood -0.012801 -0.012801  0.00713 -1.79436  1  7.28e-02 .
## rdw_10      Blood  0.058557  0.058557  0.01828  3.20254  1  1.36e-03 **
## wbc_10      Blood  0.016691  0.016691  0.03908  0.42707  1  6.69e-01
## plt_100     Blood  0.095820  0.095820  0.09229  1.03821  1  2.99e-01
## hgb_10      Blood  0.006904  0.006904  0.01981  0.34856  1  7.27e-01
```

RDW p-val 9.171138e-03

```
survConcordance(sangerSurv ~ fitSanger$linear.predictors)
```

```
## Call:
## survConcordance(formula = sangerSurv ~ fitSanger$linear.predictors)
##
## n = 149
## Concordance = 0.7918502 se = 0.06247796
## concordant discordant tied.risk tied.time std(c-d)
## 1438.00 378.00 0.00 0.00 226.92
```

### 12.5.2.2 Adjusted

```
fitWeightedSanger <- CoxRFX(sangerX, sangerSurv, sangerGroups, which.mu=which.mu,
sigma0=sigma0, nu=nu, weights=weights[cohort=="Sanger"])
waldWeightedSanger <- WaldTest(fitWeightedSanger)
```

```
##              group   coef coef-mu   sd      z df  p.value sig
## ASXL1_0.1      Genes  3.2736  1.1639 0.5035  6.5016 1 7.95e-11 ***
## CBL_0.1        Genes  0.4415 -1.6682 1.4885  0.2966 1 7.67e-01
## DNMT3A_0.1     Genes  0.5963 -1.5134 0.2434  2.4497 1 1.43e-02  *
## JAK2_0.1       Genes -0.0225 -2.1322 1.0506 -0.0214 1 9.83e-01
## KMT2C_0.1      Genes  0.8233 -1.2864 1.4975  0.5498 1 5.82e-01
## KMT2D_0.1      Genes -0.1936 -2.3033 0.9186 -0.2108 1 8.33e-01
## KRAS_0.1       Genes  2.6546  0.5449 0.6402  4.1468 1 3.37e-05 ***
## NF1_0.1        Genes  0.8839 -1.2258 1.4275  0.6192 1 5.36e-01
## NRAS_0.1       Genes  4.8796  2.7699 0.6294  7.7532 1 8.96e-15 ***
## RAD21_0.1      Genes  0.8665 -1.2432 1.4103  0.6144 1 5.39e-01
## SF3B1_0.1      Genes  1.2701 -0.8396 1.4768  0.8601 1 3.90e-01
## SRSF2_0.1      Genes  1.6909 -0.4188 0.2626  6.4399 1 1.20e-10 ***
## TET2_0.1       Genes  1.3640 -0.7457 0.1595  8.5534 1 1.19e-17 ***
## TP53_0.1       Genes  5.1102  3.0005 1.0728  4.7634 1 1.90e-06 ***
## U2AF1_0.1      Genes  8.0069  5.8972 0.9739  8.2214 1 2.01e-16 ***
## age_10         Demographics -0.0522 -0.0522 0.1212 -0.4306 1 6.67e-01
## gender         Demographics -0.0216 -0.0216 0.0988 -0.2185 1 8.27e-01
## systol_100     Blood  0.0064  0.0064 0.0409  0.1566 1 8.76e-01
## diastol_100    Blood  0.0251  0.0251 0.0269  0.9320 1 3.51e-01
## bmi_10         Blood  0.0956  0.0956 0.0826  1.1574 1 2.47e-01
## cholestl_10    Blood  0.0143  0.0143 0.0155  0.9246 1 3.55e-01
## triglyc        Blood -0.0533 -0.0533 0.1279 -0.4169 1 6.77e-01
## hdl            Blood -0.0505 -0.0505 0.0839 -0.6015 1 5.48e-01
## ldl            Blood  0.2011  0.2011 0.1239  1.6229 1 1.05e-01
## lym            Blood  0.0499  0.0499 0.0996  0.5009 1 6.16e-01
## mcv_100        Blood -0.0238 -0.0238 0.0075 -3.1777 1 1.48e-03  **
## rdw_10         Blood  0.0832  0.0832 0.0142  5.8698 1 4.36e-09 ***
## wbc_10         Blood  0.0108  0.0108 0.0544  0.1988 1 8.42e-01
## plt_100        Blood  0.1509  0.1509 0.1056  1.4297 1 1.53e-01
## hgb_10         Blood -0.0224 -0.0224 0.0217 -1.0308 1 3.03e-01
```

RDW p-val 1.233241e-07

```
survConcordance(sangerSurv ~ fitWeightedSanger$linear.predictors, weights=weights[
cohort=="Sanger"])
```

```
## Call:
## survConcordance(formula = sangerSurv ~ fitWeightedSanger$linear.predictors,
## weights = weights[cohort == "Sanger"])
##
## n= 149
## Concordance= 0.8671072 se= 0.06105924
## concordant discordant tied.risk tied.time std(c-d)
## 135478.93 20763.49 0.00 0.00 19080.09
```

Uno's estimator of cumulative/dynamic AUC

```
w <- c(which(sangerSurv[,1]==0)[-1]-1, nrow(sangerSurv))
s <- Surv(sangerSurv[w,2], sangerSurv[w,3])
a <- AUC.uno(s, s, fitWeightedSanger$linear.predictors[w], times= c(0, 22, 0.1))
round(a$iauc, digits = 3)
```

```
## [1] 0.587
```

## 13 Session

```
devtools::session_info()
```

```
## Session info -----
## -----
```

```
## setting value
## version R version 3.4.2 (2017-09-28)
## system x86_64, darwin15.6.0
## ui X11
## language (EN)
## collate en_US.UTF-8
## tz Europe/London
## date 2018-02-16
```

```
## Packages -----
## -----
```

```
## package * version date source
## backports 1.1.1 2017-09-25 CRAN (R 3.4.2)
## base * 3.4.2 2017-10-04 local
## bitops 1.0-6 2013-08-17 CRAN (R 3.4.0)
## car 2.1-6 2017-11-19 CRAN (R 3.4.3)
## caTools 1.17.1 2014-09-10 CRAN (R 3.4.0)
## codetools 0.2-15 2016-10-05 CRAN (R 3.4.2)
## compiler 3.4.2 2017-10-04 local
## CoxHD * 0.0.73 2018-01-08 Github (gerstung-lab/CoxHD@bc60c16)
## datasets * 3.4.2 2017-10-04 local
## devtools 1.13.4 2017-11-09 CRAN (R 3.4.2)
## digest 0.6.12 2017-01-27 CRAN (R 3.4.0)
## evaluate 0.10.1 2017-06-24 CRAN (R 3.4.1)
## foreach * 1.4.3 2015-10-13 cran (@1.4.3)
## gdata 2.18.0 2017-06-06 CRAN (R 3.4.0)
## glmnet * 2.0-13 2017-09-22 cran (@2.0-13)
## gplots * 3.0.1 2016-03-30 CRAN (R 3.4.0)
## graphics * 3.4.2 2017-10-04 local
## grDevices * 3.4.2 2017-10-04 local
## grid 3.4.2 2017-10-04 local
## gtools 3.5.0 2015-05-29 CRAN (R 3.4.0)
## htmltools 0.3.6 2017-04-28 CRAN (R 3.4.0)
```

```

## iterators      1.0.8   2015-10-13  cran (@1.0.8)
## jsonlite      1.5     2017-06-01  CRAN  (R 3.4.0)
## KernSmooth   2.23-15  2015-06-29  CRAN  (R 3.4.2)
## knitr        * 1.17   2017-08-10  CRAN  (R 3.4.1)
## lattice      0.20-35  2017-03-25  CRAN  (R 3.4.2)
## lme4         1.1-15   2017-12-21  CRAN  (R 3.4.3)
## magrittr     1.5     2014-11-22  CRAN  (R 3.4.0)
## MASS        7.3-48   2017-12-25  CRAN  (R 3.4.3)
## Matrix      * 1.2-11   2017-08-21  CRAN  (R 3.4.2)
## MatrixModels 0.4-1    2015-08-22  CRAN  (R 3.4.0)
## memoise     1.1.0    2017-04-21  CRAN  (R 3.4.0)
## methods    * 3.4.2   2017-10-04  local
## mg14        0.0.5    2017-11-18  Github (mg14/mg14@a8b4ba8)
## mgcv        1.8-20   2017-09-14  CRAN  (R 3.4.2)
## mice        2.46.0   2017-10-24  cran (@2.46.0)
## minqa       1.2.4     2014-10-09  CRAN  (R 3.4.0)
## mvtnorm     1.0-6     2017-03-02  CRAN  (R 3.4.0)
## nlme        3.1-131  2017-02-06  CRAN  (R 3.4.2)
## nloptr      1.0.4     2014-08-04  CRAN  (R 3.4.0)
## nnet        7.3-12   2016-02-02  CRAN  (R 3.4.2)
## parallel   * 3.4.2    2017-10-04  local
## pbkrtest    0.4-7     2017-03-15  CRAN  (R 3.4.0)
## quantreg    5.34     2017-10-25  CRAN  (R 3.4.2)
## RColorBrewer * 1.1-2    2014-12-07  CRAN  (R 3.4.0)
## Rcpp        0.12.15  2018-01-20  cran (@0.12.15)
## rmarkdown   1.8       2017-11-17  CRAN  (R 3.4.2)
## ROCR        * 1.0-7    2015-03-26  CRAN  (R 3.4.0)
## rpart       4.1-11   2017-03-13  CRAN  (R 3.4.2)
## rprojroot   1.3-1    2017-12-18  CRAN  (R 3.4.2)
## SparseM     1.77     2017-04-23  CRAN  (R 3.4.0)
## splines     3.4.2    2017-10-04  local
## stats      * 3.4.2    2017-10-04  local
## stringi    1.1.6    2017-11-17  CRAN  (R 3.4.2)
## stringr    1.2.0    2017-02-18  CRAN  (R 3.4.0)
## survAUC    * 1.0-5    2012-09-04  CRAN  (R 3.4.0)
## survival   * 2.41-3   2017-04-04  CRAN  (R 3.4.0)
## survivalROC * 1.0.3    2013-01-13  CRAN  (R 3.4.0)
## tools      3.4.2    2017-10-04  local
## utils      * 3.4.2    2017-10-04  local
## withr      2.1.0    2017-11-01  CRAN  (R 3.4.2)
## yaml       2.1.14   2016-11-12  CRAN  (R 3.4.0)

```

This code and all data necessary to execute it is available from <http://www.github.com/gerstung-lab/>  
(<http://www.github.com/gerstung-lab/>)
